# Supplementary material for: RAISE study protocol: a cross-sectional, multilevel, neurobiological study of resilience after individual stress exposure
Source: PubMed Central journal article supplement — BMJ Open. 2021 Jan 12;11(1):e040394. doi: 10.1136/bmjopen-2020-040394 (PMC7805358; doi:10.1136/bmjopen-2020-040394), 2021-01-12
Supplement: bmjopen-2020-040394.draft_revisions.pdf [file bmjopen-2020-040394.draft_revisions.pdf]

# BMJ Open

BMJ Open is committed to open peer review. As part of this commitment we make the peer review history of every article we publish publicly available.

When an article is published we post the peer reviewers' comments and the authors' responses online. We also post the versions of the paper that were used during peer review. These are the versions that the peer review comments apply to.

The versions of the paper that follow are the versions that were submitted during the peer review process. They are not the versions of record or the final published versions. They should not be cited or distributed as the published version of this manuscript.

BMJ Open is an open access journal and the full, final, typeset and author-corrected version of record of the manuscript is available on our site with no access controls, subscription charges or pay-per-view fees (<http://bmjopen.bmj.com>).

If you have any questions on BMJ Open's open peer review process please email [info.bmjopen@bmj.com](mailto:info.bmjopen@bmj.com)

# BMJ Open

## The RAISE study protocol; a cross-sectional, multi-level, neurobiological study of studying resilience after individual stress exposure

|                               |                                                                                                                                                                                                                                                                                                                                                                                                                                                                                                                                                                                                                                                                                                                                                                                                                                                                                                                                                     |
|-------------------------------|-----------------------------------------------------------------------------------------------------------------------------------------------------------------------------------------------------------------------------------------------------------------------------------------------------------------------------------------------------------------------------------------------------------------------------------------------------------------------------------------------------------------------------------------------------------------------------------------------------------------------------------------------------------------------------------------------------------------------------------------------------------------------------------------------------------------------------------------------------------------------------------------------------------------------------------------------------|
| Journal:                      | <i>BMJ Open</i>                                                                                                                                                                                                                                                                                                                                                                                                                                                                                                                                                                                                                                                                                                                                                                                                                                                                                                                                     |
| Manuscript ID                 | bmjopen-2020-040394                                                                                                                                                                                                                                                                                                                                                                                                                                                                                                                                                                                                                                                                                                                                                                                                                                                                                                                                 |
| Article Type:                 | Protocol                                                                                                                                                                                                                                                                                                                                                                                                                                                                                                                                                                                                                                                                                                                                                                                                                                                                                                                                            |
| Date Submitted by the Author: | 13-May-2020                                                                                                                                                                                                                                                                                                                                                                                                                                                                                                                                                                                                                                                                                                                                                                                                                                                                                                                                         |
| Complete List of Authors:     | <p>Moreno-López, Laura; University of Cambridge School of Clinical Medicine, Department of Psychiatry</p> <p>Sallie, Samantha; University of Cambridge School of Clinical Medicine, Department of Psychiatry</p> <p>Ioannidis, Konstantinos; University of Cambridge School of Clinical Medicine, Department of Psychiatry; Cambridgeshire and Peterborough NHS Foundation Trust</p> <p>Kaser, Muzaffer; University of Cambridge School of Clinical Medicine, Department of Psychiatry; Cambridgeshire and Peterborough NHS Foundation Trust</p> <p>Schueler, Katja; Johannes Gutenberg Universitat Mainz, Department for Clinical and Neuropsychology</p> <p>Askelund, Adrian; University of Oslo, Department of Psychology</p> <p>Turner, Lorinda; University of Cambridge School of Clinical Medicine, Department of Medicine</p> <p>van Harmelen, Anne-Laura; University of Cambridge School of Clinical Medicine, Department of Psychiatry</p> |
| Keywords:                     | Child & adolescent psychiatry < PSYCHIATRY, IMMUNOLOGY, Magnetic resonance imaging < RADIOLOGY & IMAGING                                                                                                                                                                                                                                                                                                                                                                                                                                                                                                                                                                                                                                                                                                                                                                                                                                            |
|                               |                                                                                                                                                                                                                                                                                                                                                                                                                                                                                                                                                                                                                                                                                                                                                                                                                                                                                                                                                     |

SCHOLARONE™  
Manuscripts

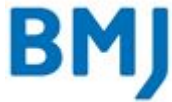

I, the Submitting Author has the right to grant and does grant on behalf of all authors of the Work (as defined in the below author licence), an exclusive licence and/or a non-exclusive licence for contributions from authors who are: i) UK Crown employees; ii) where BMJ has agreed a CC-BY licence shall apply, and/or iii) in accordance with the terms applicable for US Federal Government officers or employees acting as part of their official duties; on a worldwide, perpetual, irrevocable, royalty-free basis to BMJ Publishing Group Ltd ("BMJ") its licensees and where the relevant Journal is co-owned by BMJ to the co-owners of the Journal, to publish the Work in this journal and any other BMJ products and to exploit all rights, as set out in our [licence](#).

The Submitting Author accepts and understands that any supply made under these terms is made by BMJ to the Submitting Author unless you are acting as an employee on behalf of your employer or a postgraduate student of an affiliated institution which is paying any applicable article publishing charge ("APC") for Open Access articles. Where the Submitting Author wishes to make the Work available on an Open Access basis (and intends to pay the relevant APC), the terms of reuse of such Open Access shall be governed by a Creative Commons licence – details of these licences and which [Creative Commons](#) licence will apply to this Work are set out in our licence referred to above.

Other than as permitted in any relevant BMJ Author's Self Archiving Policies, I confirm this Work has not been accepted for publication elsewhere, is not being considered for publication elsewhere and does not duplicate material already published. I confirm all authors consent to publication of this Work and authorise the granting of this licence.

1  
2  
3  
4  
5  
6  
7  
8 **The RAISE study protocol; a cross-sectional, multi-level, neurobiological**  
9 **study of studying resilience after individual stress exposure**  
10  
11  
12  
13

14 Laura Moreno-López<sup>1,\*</sup>, Samantha N. Sallie<sup>2</sup>, Konstantinos Ioannidis<sup>3,4</sup>, Muzaffer  
15 Kaser<sup>5,6</sup>, Katja Schueler<sup>7</sup>, Adrian Dahl Askelund<sup>8</sup>, Lorinda Turner<sup>9</sup>, RAISE Consortium,  
16 & Anne-Laura van Harmelen<sup>10,\*</sup>  
17  
18  
19

20 \* Corresponding author  
21  
22  
23

24 <sup>1</sup> Department of Psychiatry, University of Cambridge, 18b Trumpington Rd, Cambridge, CB2 8AH,  
25 UK. [lm618@medschl.cam.ac.uk](mailto:lm618@medschl.cam.ac.uk).

26 <sup>2</sup> Department of Psychiatry, University of Cambridge, UK. [sns36@cam.ac.uk](mailto:sns36@cam.ac.uk).

27 <sup>3</sup> Department of Psychiatry, University of Cambridge, UK. [konstantinos.ioannidis@cpft.nhs.uk](mailto:konstantinos.ioannidis@cpft.nhs.uk).

28 <sup>4</sup> Cambridgeshire and Peterborough NHS Foundation Trust, Fulbourn, UK. [konstantinos.ioannidis@cpft.nhs.uk](mailto:konstantinos.ioannidis@cpft.nhs.uk).

29 <sup>5</sup> Department of Psychiatry, University of Cambridge, UK. [mk708@medschl.cam.ac.uk](mailto:mk708@medschl.cam.ac.uk).

30 <sup>6</sup> Cambridgeshire and Peterborough NHS Foundation Trust, Fulbourn, UK. [mk708@medschl.cam.ac.uk](mailto:mk708@medschl.cam.ac.uk).

31 <sup>7</sup> Department for Clinical and Neuropsychology, Johannes Gutenberg University of Mainz, Germany.  
32 [kschueler@uni-mainz.de](mailto:kschueler@uni-mainz.de).

33 <sup>8</sup> Department of Psychology, University of Oslo, Norway. [adrian.askelund@gmail.com](mailto:adrian.askelund@gmail.com).

34 <sup>9</sup> Department of Medicine, University of Cambridge, UK. [lt400@medschl.cam.ac.uk](mailto:lt400@medschl.cam.ac.uk)

35 <sup>10</sup> Department of Psychiatry, University of Cambridge, 18b Trumpington Rd, Cambridge, CB2 8AH, UK.  
36 [av391@medschl.cam.ac.uk](mailto:av391@medschl.cam.ac.uk).  
37  
38  
39  
40  
41  
42  
43  
44  
45  
46  
47  
48  
49  
50  
51  
52  
53  
54  
55  
56  
57  
58  
59  
60

Abstract = 294

Wordcount = 4.176

## ABSTRACT

**Introduction:** This paper describes the protocol for an ongoing project funded by the Royal Society, the Resilience After Individual Stress Exposure (RAISE) study; which aims to examine the factors and mechanisms that facilitate resilient functioning after childhood adversity (CA). **Methods and Analysis:** We aim to recruit up to 200 participants. We will use dimension reduction techniques (PCA) on standard-normally transformed individual parameters of mental health, social functioning and CA to calculate a composite measure of adaptive (i.e., ‘resilient’) psychosocial functioning. To examine the neuro-immune responses to stress and their relationship with the brain and social environment, we will use a well validated functional magnetic resonance imaging (fMRI) task; the Montreal imaging stress task (MIST), and venepuncture. We will run group or dimensional comparisons in multiple levels of biological and psychological outcomes, as well as mediation and moderation analyses to study how key biological systems (i.e., the hypothalamic-pituitary-adrenal axis and the immune system) interrelate and interact with brain function and social influences in order to facilitate resilient functioning after CA. We hypothesize that resilient functioning will be facilitated by reduced morning cortisol and cytokine levels before and after the stressor and improved neural responses to such stress, as well as increased gray matter volume in the hippocampus and prefrontal cortex, enhanced inhibitory control and emotion regulation, and more friendship and family support. **Ethics and Dissemination:** This study has been reviewed and given favourable opinion by the National Research Ethics Service, NRES Committee East of England – Cambridge Central and external reviewers from the Royal Society (RGF\R1\180064 and RGF\EA\180029). The results of the RAISE study will be disseminated through (1) publications in scientific peer reviewed journals, (2) presentations on relevant scientific conferences and meetings, (3) publications and presentations for the general public and (4) through social media.

**Keywords:** Resilience; Stress; Childhood adversity; Maltreatment; Adolescence.

### **Strengths and limitations of this study**

The RAISE study will provide a comprehensive evaluation of the neurobiological mechanisms that contribute to adolescent resilience.

The study assesses the mechanisms that contribute to adolescent resilience incorporating standardised and validated instruments of psychological functioning, childhood adversity, cognitive tasks, venepuncture and neuroimaging.

The findings will help inform intervention strategies for individuals who have experienced childhood adversity in order to prevent the development of mental health disorders, and ultimately increase resilience.

Child adversity will be assessed from self-reports subjected to reporting biases.

A longer recruitment period may be required due to Covid-19.

## 1. INTRODUCTION

Up to a third of children worldwide experience childhood adversity (CA) within the family environment (1,2). CA within the family environment comprises childhood maltreatment (including emotional, sexual, and physical abuse, and emotional and physical neglect) and intra-family adversity (including marital distress/conflict, parental alcohol dependence, aggressive parenting behaviours, parental violence, parental mental health problems, and stressful family life events) before the age of 16 (3).

CA is the leading preventable risk factor for mental illness and substance abuse (4-11). It can have a detrimental impact on a wide range of functions. For example, CA has been associated with physical (e.g., failure to thrive, poor adult health, and high mortality), cognitive (e.g., impaired inhibitory control and emotion regulation), and personal and interpersonal problems (e.g., negative self-cognitions, suicidal behaviours, increased peer rejection, social withdrawal, sexual maladjustment, aggression, and criminality) (11-19).

Importantly, adolescents with CA are at increased risk for and are more sensitive to psychosocial stress. In response to acute stress, the body reacts by releasing pro-inflammatory cytokines, such as interleukin-6 (IL-6) and tumor necrosis factor alpha (TNF- $\alpha$ ) (20). These cytokines play a key role in stress reactivity and stress recovery (21). Specifically, pro-inflammatory cytokines stimulate the hypothalamic-pituitary-adrenal (HPA) axis to release glucocorticoid hormones such as cortisol.

Glucocorticoids, in turn, suppress the further release of cytokines from the immune system (22). Thus, cortisol is an important anti-inflammatory compound in the body that is crucial for stress recovery. Pro-inflammatory cytokines and chemokines can cross the blood-brain barrier and negatively impact the function of brain regions involved in threat, reward, and executive functioning (23,24). Indeed, acute stress is associated with increased levels of pro-inflammatory cytokines in the amygdala and decreased pro-inflammatory cytokines in the medial prefrontal cortex (MPFC) (25); regions associated with executive functions and emotion regulation (26-31). Therefore, it is plausible that the alteration of these processes, or the inability to properly value and manage emotions, can lead to anxiety and/or depression in situations of negative affect (32-34).

1  
2  
3 However, although CA is associated with considerably lowered odds of adequate  
4 mental and physical health functioning later in life, a significant proportion of  
5 individuals with a history of CA function ‘better than expected,’ or, in other words, are  
6 “functioning resiliently” (35). Resilient functioning after CA is thought to be facilitated  
7 by protective ‘resilience factors’ that help individuals to adapt and recover from, or  
8 compensate for, the sequelae of CA (36, Figure 1). However, it is yet unknown whether  
9 and how neuro-immune responses to psychosocial stress differ in resilient vs.  
10 vulnerable adolescents with a history of CA.  
11  
12  
13  
14  
15  
16  
17

## 18 **2. OBJECTIVES AND HYPOTHESIS**

19  
20 Resilient functioning has been associated with various somatic components, ranging  
21 from genes and cellular mechanisms to higher-order biological systems and the social  
22 environment (see reviews in 36-38; Figure 1). In this study, we aim to test the factors  
23 and mechanisms that facilitate resilient functioning, the interactions between those  
24 factors, and how they explain resilient responses to future stress. Specifically, we will  
25 address resilience by investigating how key biological systems (i.e., the HPA axis and  
26 the immune system) interrelate and interact with brain structure, brain function, and  
27 social influences to facilitate resilient functioning after CA.  
28  
29  
30  
31  
32  
33  
34

35 All included participants will complete an online assessment to assess psychological  
36 functioning and early life experiences, an in-unit assessment day to assess neuro-  
37 immune and cognitive responses to stress, and an online follow-up assessment to assess  
38 psychological functioning after stress exposure. Resilient functioning will be quantified  
39 as the degree to which an individual functions better or worse than expected given their  
40 self-reported childhood family experiences (35; Figure 2). To examine the neuro-  
41 immune responses to stress and their relationship with brain structure and function and  
42 the social environment, we will use a well-validated functional magnetic resonance  
43 imaging (fMRI) task, The Montreal imaging stress task (MIST), and venepuncture.  
44 Since stress increases circulating inflammatory protein levels in the blood, and high  
45 levels of inflammation predict later mental health disorders, we will examine whether  
46 resilience is related to lower levels of inflammation in response to psychosocial stress,  
47 and whether this is explained by improved brain responses to stress.  
48  
49  
50  
51  
52  
53  
54  
55  
56  
57  
58  
59  
60



We hypothesise that resilient functioning will be facilitated by:

- 1) Reduced morning cortisol and cytokine levels before and after the stressor (i.e., a latent factor constructed by serum high-sensitivity c-reactive protein (hs-CRP), TNF- $\alpha$ , IL-6 and Interleukin-1 factor beta (IL1 $\beta$ ) levels, as these have been shown to be increased in those with CA and mental illness (i.e., 39-43)).
- 2) Reduced stress-related brain responses (i.e., amygdala, insula) and increased modulatory responses in the MPFC and anterior cingulate cortex (ACC) (44-46) during the MIST.
- 3) Increased functional connectivity between the DMPFC and emotion processing regions (e.g., insula, amygdala and hippocampus) during the MIST (47).
- 4) Increased gray matter volume in the hippocampus and prefrontal cortex (48-54).
- 5) Enhanced cognitive and emotional executive performance in behavioural tasks of inhibitory control and emotion regulation (32).
- 6) Lower interpersonal stress and trait anxiety, higher self-esteem, and more friendship and family support (3, 55).
- 7) Finally, we expect that the neurocognitive mechanisms that facilitate resilient functioning to stress at in-unit assessment will be related to improved cognitive and emotional functioning at follow-up (lower rumination, lower interpersonal stress, improved mood) in line with the neuro-immune network hypothesis (24; Figure 3).

### 3. METHODS

#### 3.1. Recruitment and eligibility

Recent research suggests that the link between CA and immune markers in the blood are small for hsCRP immune biomarkers in adults with depression (hsCRP  $r=0.15$ , 56). However, there are no studies investigating immune biomarkers in response to stress in adolescents. Therefore, it is difficult to determine the necessary sample size for our study. For instance, sample sizes for an intended power of 80% are  $r=0.15$ :  $n=345$ ;  $r=0.2$ :  $n=193$ ;  $r=0.3$ :  $n=84$ . Furthermore, it is well-established that sample correlations show fluctuations and are unstable in smaller samples. Simulation studies show that for a stable (i.e., replicable and generalizable) correlation, any sample would need to approach  $N=250$  individuals (57). For this reason, to increase power to find small effects, we will recruit  $N=200$  participants. With this sample size, our study is

1  
2  
3 appropriately powered to detect correlations from  $r > 0.19$ .  
4  
5

6 Participants will be recruited from the general population and from previous studies  
7 conducted in the Department of Psychiatry of the University of Cambridge. First, we  
8 will contact participants from the Neuroscience in Psychiatry Network (NSPN) study  
9 who agreed to be contacted again. NSPN is a multi-centre accelerated longitudinal  
10 community cohort study (N=2389) focusing on normative adolescent to young adult  
11 development (between the ages of 14 and 24). Overall, this sample can be described as  
12 healthy, reporting low levels of psychopathological symptoms, behaviours and/or  
13 personality traits, and average mental wellbeing scores. From this cohort, we will  
14 contact those who agreed to be contacted for future research of whom family adversity  
15 scores were in the highest 25% of the entire NSPN cohort ( $\geq 75\% = 597$  eligible  
16 individuals) as assessed by van Harmelen et al., 2017 (35). Family adversity scores in  
17 NSPN were calculated using a Principal Component Analysis (PCA) on standard-  
18 normally transformed sum scores for the Measure of Parenting Style (MOPS) and the  
19 Alabama Parenting Questionnaire (APQ) (see 35 for details). Eligible participants will  
20 be contacted via email first. This email will include the participant information sheet  
21 (PIS) of the study. A reminder email will be sent after a month. Finally, we will contact  
22 those participants who cannot be reached by email via phone call. To recruit participants  
23 from the general population we will distribute flyers and advertisements in colleges,  
24 Addenbrooke's hospital, and online. Individuals expressing an interest in the study  
25 could either email or telephone a member of the research team and leave their contact  
26 details. A member of the RAISE study research team will then phone interested  
27 individuals. During the telephone call a member of the research team will discuss the  
28 content of the PIS and assess the inclusion and exclusion criteria in order to ensure they  
29 are eligible and fully aware of the nature of the study. Eligible participants will be  
30 emailed the PIS of the study. Potential participants will be given the opportunity to raise  
31 any queries regarding any aspect of the study including confidentiality, anonymity,  
32 storage and use of data, as well as the right to withdraw.  
33  
34  
35  
36  
37  
38  
39  
40  
41  
42  
43  
44  
45  
46  
47  
48  
49  
50  
51

52  
53 The inclusion criteria will be: aged 16-26 years old; able and willing to give informed  
54 consent; able to speak, write, and understand English; BMI between 18.5 and 29.9  
55 kg/m<sup>2</sup>; have experienced adverse life experiences and/or CA within the family  
56 environment (e.g., emotional, sexual and/or physical abuse, emotional and/or physical  
57 neglect, marital distress/conflict, parental mental health problems and/or parental  
58  
59  
60

1  
2  
3 alcohol dependence, violence and/or aggressive behaviour) before the age of 16; and  
4 willing to abstain from strenuous exercise for 72 hours prior to the in-unit assessment.  
5  
6

7  
8 The exclusion criteria will be: alcohol or substance use disorder within the past 6  
9 months; current disorders likely to compromise the interpretation of the data (including,  
10 but not limited to, psychiatric disorders, immunological disorders, cardiovascular  
11 disorders, endocrine and autoimmune disorders, malignancies or infections, or any other  
12 condition to be determined by the principal investigator or delegate); current medication  
13 likely to compromise the interpretation of immunological data (including, but not  
14 limited to, corticosteroids or any other substance to be determined by the principal  
15 investigator or delegate); and contraindications to MRI (e.g., pacemaker or other  
16 implantable device or pregnancy).  
17  
18  
19  
20  
21  
22

### 23 24 3.2. Testing protocol and procedure 25

26  
27 All included participants will be asked to complete 3 phases:  
28

29  
30 Phase I: an online assessment to assess psychological functioning and early life  
31 experiences; phase II: an in-unit assessment to assess neuro-immune and cognitive  
32 responses to stress, and phase III: an online follow-up assessment to assess  
33 psychological functioning after stress exposure. Please see Figure 4 and sections below  
34 for a description of the measures included in each phase.  
35  
36  
37

#### 38 39 Phase I: online assessment 40

41  
42 The online assessment will include signing an informed consent form (ICF), the  
43 completion of a set of self-report questionnaires and two cognitive tasks online. The  
44 self-report questionnaires included in this assessment will be the Mood and Feelings  
45 Questionnaire (MFQ; 58), Revised Children's Manifest Anxiety Scale (RCMAS; 59),  
46 Leyton Obsessional Inventory (LOI; 60), the 10-item version of the Kessler  
47 Psychological Distress Scale (K10; 61), the Behaviours Checklist (BC), the Warwick-  
48 Edinburgh Mental Well-being Scale (WEMWBS; 62), the Measure of Parenting Style  
49 (MOPS; 63), the Alabama Parenting Questionnaire (APQ; 64), the Cambridge  
50 Friendship Questionnaire (CFQ), Family Assessment Device (FAD; 65, 66), Rosenberg  
51 Self-Esteem Scale (RSES; 67), Childhood Trauma Questionnaire (CTQ; 68) and the  
52 Drugs, Alcohol, and Self-Injury Inventory (DASI; 69). These questionnaires will be  
53  
54  
55  
56  
57  
58  
59  
60

1  
2  
3 used to calculate a composite measure of resilient functioning (as described in 35). The  
4 cognitive tasks will be the Emotional Stroop task (70) and Emotional Regulation task  
5 (71). More information about these measures is provided in the Supplementary  
6  
7  
8 Material.

### 11 Phase II: in-unit assessment

13  
14 Following completion of the online assessment, participants will be contacted to  
15 schedule an appointment at Addenbrooke's Hospital (Cambridge, UK), after which they  
16 will receive a letter with the appointment details. This letter will include clothing and  
17 make-up regulations for brain scanning, time and location of the facilities where the  
18 evaluations will take place, as well as the research team's contact details. It will also  
19 reiterate that participation is voluntary and that participants can withdraw at any given  
20 time during the study. The second assessment will have a duration of 5 hours and will  
21 include (1) the completion of a second ICF, (2) a clinical evaluation, (3) a research  
22 nurse protocol, (4) an MRI session, and (5) the completion of a second set of self-report  
23 questionnaires. Please see the sections below for a description of the instruments  
24 included in each assessment.  
25  
26  
27  
28  
29  
30  
31  
32

### 33 **Clinical evaluation**

34  
35  
36 Participants will be asked to attend the clinical research facility (CRF) at  
37 Addenbrooke's Hospital at 9am, where they will be given a detailed overview of the  
38 study, asked to sign the ICF, and receive a low-fat breakfast adapted to their nutritional  
39 needs. The breakfast provided will exclude antioxidants such as glutathione and  
40 vitamins E and C to reduce the effects of these variables on the inflammatory markers  
41 addressed (72). Subsequently, the clinical evaluation will take place. This session will  
42 include the evaluation of psychiatric disorders, handedness, physical activity, sleep and  
43 eating patterns, medications (e.g., oral contraception), and intellectual functioning.  
44 Specifically, we will use the following measures: The Mini-International  
45 Neuropsychiatric Interview (MINI; 73), The Edinburgh handedness inventory (74), The  
46 Short-form Frequency Food questionnaire (SFFFQ; 75) and The Wechsler Abbreviated  
47 Scale of Intelligence (WASI; 76). The measures used will be supplemented with an  
48 interview. See the Supplementary Material for a description of the instruments used in  
49 this evaluation.  
50  
51  
52  
53  
54  
55  
56  
57  
58  
59  
60

## Physiological evaluation protocol

The clinical assessment will be followed by a physiological evaluation protocol. A research nurse will assess physical variables such as body temperature, height, weight, waist circumference, blood pressure (systolic and diastolic), and will implant a cannula to take blood samples during the assessment day.

### *Venepuncture*

The implantation of the cannula will be conducted according to the standard Cambridge Clinical Research Facility protocol with risk protocols in place. These procedures include a brief interview about adverse experiences with blood assessment (such as fainting), as well as their preference for one arm or the other and if they want to lie down, or sit upright during the implantation of the cannula. Up to 30 mL of venous blood will be collected per participant for the measurement of cortisol, blood cytokines and immunophenotyping (i.e., basic immune cell counts and cell phenotyping). Blood will be extracted using an intravenous catheter inserted in the antecubital vein of the arm of the participants. 30 minutes following catheter insertion, the participants will undergo MRI scanning and will perform the psychological stress task (i.e., MIST). 1.2 mL K2 EDTA tubes will be taken for the analysis of immunophenotyping, 2.6 mL serum white tap tubes for the analysis of cytokines and 4.6 mL serum brown tap tubes for the analysis of cortisol. Bloods will be acquired at 4 time points: (-T1) 45 min before the start of the task (baseline line), (T0) right before the start of the task, (T30) right after the end of the task (peak cortisol) (T80) 80 min after the start of the task (delayed immune reactions) (81). Please see Figure 5 for a representation of the venepuncture protocol.

### Neuroimaging protocol

Before the scan, participants will complete an MRI screening form, the State-Trait Anxiety Inventory (77), and practice the MIST. Each participant will be in the MRI scanner for about 50 minutes. The MRI scanning session will comprise the following MRI sequences:

*T1-weighted three-dimensional magnetisation-prepared rapid gradient-echo (MPRAGE)* (6 mins). High spatial resolution T1-weighted structural scans will be used

1  
2  
3 to aid normalisation and visualisation of each of the other MRI modalities (as described  
4 below) and analyse brain structure (i.e., cortical thickness, grey matter volume).

5  
6  
7 *Resting state functional MRI (7 mins)*. A resting state fMRI will be used to investigate  
8 effects of inflammation on brain functional connectivity.  
9

10  
11  
12 *Montreal Imaging Stress Task (30 mins)*. We will use a modified version of the  
13 Montreal imaging stress task (MIST; 78). This task comprises a series of computerized  
14 mental arithmetic tasks with an induced failure component. The protocol consists of a  
15 training session conducted outside the imaging unit, and a test session during which the  
16 functional images are acquired. Please see the Supplementary Material for a description  
17 of the paradigm.  
18  
19

20  
21  
22  
23 After the MRI session, participants will be debriefed. We will tell them that the task was  
24 designed to be impossible to accomplish and that it did not truly assess their ability to  
25 perform mental arithmetic. Then, we will ask them to complete the STAI-State, MFQ,  
26 Life Events Questionnaire (79), and any questionnaire from the online assessment that  
27 is incomplete. After completion of the post-MRI session, the participants will have a  
28 standard meal and be given time to relax. In addition, we will have a protocol for  
29 debriefing, an information letter with relevant types of support available, and a distress  
30 protocol in case the participant reports severe distress.  
31  
32  
33  
34  
35  
36  
37

### 38 Phase III: follow-up online assessment

39  
40  
41 The follow-up and final assessment will be completed online within a month from the  
42 in-unit assessment and will include the signature of the third and last online ICF, the  
43 MFQ, RCMAS, and LEQ, as well as the following measures described in the  
44 Supplementary Material: Perceived Stress Scale (PSS; 80), Interpersonal Sensitivity  
45 Measure (IPSM; 81) and the 10-item Ruminative Response Scale (RRS-10; 82).  
46  
47  
48  
49

50 Please see the Supplementary Material for a relation of the main risk and ethical issues  
51 associated with this protocol.  
52  
53

## 54 **4. ANALYSES**

55  
56  
57 Clinical, questionnaire, and immunological data will be descriptively summarised. The  
58 significance threshold will be set at  $p < 0.05$  and Family-Wise Error (FWE) corrections  
59  
60

1  
2  
3 will be applied to correct for multiple comparisons.  
4  
5

#### 6 4.1. Preprocessing 7

##### 8 *Quantification of resilient functioning* 9

10  
11 Using the data collected during the first online assessment, we will calculate gender and  
12 age-related degree of resilient functioning based on the model by van Harmelen et al.  
13 (35). Specifically, we will conduct a PCA on standard-normally transformed individual  
14 total scores on the MFQ, RCMAS, LOI, BC, SES, K10 and WEMWBS. From this  
15 analysis, we will extract individual scores for the first component to reflect individual  
16 current psychosocial functioning scores. We will similarly conduct a PCA on standard  
17 normal transformed MOPS, CTQ and APQ data to establish a single score that reflects  
18 CA. Next, we will relate the psychosocial functioning component score against the CA  
19 score (35). From this model, we will extract the residual scores as a measure of  
20 individual degree of resilient functioning: the extent to which an individual has better,  
21 or worse, psychosocial functioning than the average score expected given their CA  
22 experiences (35). For parsimony, we will refer to this as degree of ‘resilient functioning’  
23 with higher scores reflecting better (conditional) psychosocial functioning. These  
24 individual resilient functioning scores will be utilized in the analyses described below.  
25  
26  
27  
28  
29  
30  
31  
32  
33  
34  
35

##### 36 *Imaging preprocessing* 37

38  
39 Task-evoked and resting state fMRI data will be preprocessed using Statistical  
40 Parametric Mapping 12 (SPM12) (<http://www.fil.ion.ucl.ac.uk/spm/software/spm12/>)  
41 implemented in MatLab R2018b (Mathworks, Natick, MA, USA). Images will be  
42 corrected for movement artefacts, coregistered with the T1-weighted images,  
43 normalised to a standard EPI template in the Montreal Neurological Institute (MNI)  
44 space and spatially smoothed with an 8 mm FWHM Gaussian kernel. Quality control  
45 will be performed after each pre-processing step. Structural MRI will be analysed using  
46 the FreeSurfer image analysis suite, which is widely documented and freely available  
47 online (<http://surfer.nmr.mgh.harvard.edu/>).  
48  
49  
50  
51  
52  
53  
54

##### 55 *Cortisol and immune markers preprocessing* 56

57  
58 Blood samples will be processed at the Core Biochemical Assay Laboratory (CBAL)  
59 (blood cytokines), Pathology (cortisol), and Immunology laboratory  
60



(immunophenotyping) at Addenbrookes Hospital (Cambridge, UK). 1ml of blood will be diluted 1:1 with Phosphate Buffered Saline (PBS) and stimulated with lipopolysaccharide (LPS) (LPS challenge) to analyse the production of IL-6 and other cytokines difficult to detect (83, 84). LPS-stimulated IL-6 and IL-1 $\beta$  production in peripheral leukocytes will be processed following a protocol originally developed by DeRijk et al. (85). All cytokines, including serum TNF- $\alpha$  and hs-CRP will be measured using the MSD platform.

### *Phenotyping*

50-100  $\mu$ l of blood will be used for the enumeration of the major populations of immune cells (monocytes, granulocytes, NK cells, NKT cells, CD4+ and CD8+ T cells, and B cells). We will use multi-colour flow cytometry to count and analyse the size, shape, and properties of individual cells within heterogeneous populations. We will use multivariate methods (partial least squares and PCA) to reduce dimensionality and define populations of differentially co-expressed cell counts and the unbiased gating algorithm SPADE (Spanning-tree Progression Analysis of Density-normalized Events). SPADE generates an immune cell hierarchy by clustering phenotypically similar cells into groups which can be enumerated.

### 4.2. Statistical analyses

Age, gender, socioeconomic status, and education level will be included as covariates in all analyses. Additionally, for the imaging analysis we will include the total volume of grey matter (for the analyses of grey matter), a high-pass filter uses to remove low-frequency drifts in the data (for the analysis of fMRI data), and the signal fluctuations in white matter and cerebrospinal fluid and the subject-specific 6 realignment parameters and their first order derivatives (for the analyses of functional connectivity). Finally, phase of menstrual cycle, BMI, and tobacco smoking will be used in the analyses involving immune/cortisol markers.

Hypothesis 1: Individuals with higher resilient functioning will display lower baseline cortisol and blood cytokines, faster habituation, and less cortisol volatility:

We will use a PCA to derive a factor score for endocrine or inflammatory markers at the different time points. We expect there will be two components: one relating to baseline



1  
2  
3 cortisol (or index of immune biomarkers), and one relating to cortisol *change* (or index  
4 of immune responsivity; see 86 for a similar approach). We will then utilise area under  
5 curve (AUC) analyses to examine whether degree of resilient functioning is more  
6  
7 strongly associated with general immune status (i.e., the baseline cortisol measure) or  
8 cortisol responsivity (i.e., area under the curve with respect to ground ( $AUC_G$ ) and area  
9 under the curve with respect to increase ( $AUC_I$ ) (see 87 for specifics). We will validate  
10 this result using a simple multivariate regression to examine whether the two  
11 components of immune functioning independently predict resilient functioning  
12 outcomes.  
13  
14  
15  
16  
17  
18

19 Hypotheses 2-4: Higher resilient functioning is associated with more balanced and  
20 integrated neural systems:  
21  
22

23  
24 Imaging data will be analysed using well-established methods for quantification of  
25 structural and functional parameters. We will use both whole-brain and regions of  
26 interest (ROIs) approaches. We will use the MPFC, ACC, amygdala, insula, and  
27 hippocampus as ROIs. We will conduct multiple regression analysis to test the  
28 relationships between brain imaging and the variables of interest. The significance  
29 threshold will be set at  $p < 0.05$  after family-wise error correction for multiple  
30 comparisons across the whole-brain ( $pFWE < 0.05$ ) or the voxels of the different regions  
31 of interest ROIs (i.e., using small volume correction [SVC] procedures [ $pFWE$ -  
32 SVC  $< 0.05$ ]).  
33  
34  
35  
36  
37  
38  
39

40 Hypothesis 5 & 6: Individuals with higher resilient functioning will display better  
41 cognitive control and greater levels of social support.  
42  
43  
44

45 We will use Structural Equation Modelling (SEM) to examine the relations and  
46 interrelations described in hypotheses 5 & 6. Specifically, we hypothesise that, using a  
47 multiple indicators multiple causes (MIMIC) model, we will observe that individual  
48 differences in outcome (cognitive functioning) will be explained by partially  
49 independent and complementary neural systems (i.e., all paths shown will be significant  
50 when estimated simultaneously).  
51  
52  
53  
54

55  
56 Hypothesis 7: Neurocognitive mechanisms that facilitate resilient functioning to stress  
57 are related to improved cognitive and emotional functioning at follow up.  
58  
59  
60

1  
2  
3 Using mediation modelling (e.g. Figure 2), we will examine whether the mechanisms  
4 that facilitate resilient functioning to stress are related to improved cognitive and  
5 emotional functioning (i.e., rumination, interpersonal stress, mood, etc.) at follow up.  
6  
7  
8

### 9 *Immunophenotyping analyses*

10  
11  
12 We will assess immunophenotyping data to determine whether or not resilient  
13 adolescents can be distinguished in terms of immunophenotype levels. The proportion  
14 of each immune cell type will be used as the predictor variables in a Partial Least  
15 Squares (PLS) analysis, with resilient functioning as the response variable. Using this  
16 method, we hope to identify immune patterns that are associated with resilient  
17 functioning.  
18  
19  
20  
21  
22

## 23 **5. CURRENT STATUS**

24  
25  
26 We are currently at year 3 of the project. As of March 2020, 102 participants have been  
27 recruited for the study. From those, 62 have completed phases I, II and II of the study.  
28 Only ten participants have withdrawn following informed consent due to various  
29 reasons (e.g. scheduling conflicts, presence of mental health disorders or found images  
30 presented in the Emotional Regulation Task overly distressing). Additionally, of the  
31 adolescents screened, the most common reasons for ineligibility are MRI  
32 incompatibility (e.g. dental braces), current psychotropic medication, and BMI outside  
33 18-30. Due to the uncertainty caused by the COVID-19 outbreak we cannot anticipate  
34 when we will be able to finish the recruitment of our participants. However, we are  
35 approaching community organizations and agencies across Cambridge, including  
36 agencies working with victims of trauma to aid in the recruitment of participants with  
37 CA, and therefore we anticipate the finalization of the recruitment in three months from  
38 the time we start recruiting again.  
39  
40  
41  
42  
43  
44  
45  
46  
47  
48

## 49 **6. DISCUSSION**

50  
51  
52 The RAISE study aims to examine how resilient adolescents react to psychosocial stress  
53 in order to better understand the neurobiological mechanisms that contribute to  
54 adolescent resilience. We will examine how key biological systems (i.e., the HPA axis  
55 and the immune system) interrelate and interact with brain function and social  
56 influences in order to facilitate resilient functioning after CA. We hypothesize that  
57  
58  
59  
60

1  
2  
3 resilient functioning would be facilitated by reduced baseline cortisol and cytokine  
4 levels before and after the stressor (i.e., a latent factor constructed by serum hs-CRP and  
5 TNF- $\alpha$  and IL-6 and IL1 $\beta$  levels) as these have been shown to be increased in those  
6 with CA, mental illness, reduced stress related brain responses (i.e., amygdala, insula),  
7 and increased modulatory responses in the MPFC and ACC during the MIST.  
8 Moreover, we expect to find that the neurocognitive mechanisms that facilitate resilient  
9 functioning to stress during the in-unit assessment will be related to improved cognitive  
10 and emotional functioning at follow-up (lower rumination, lower interpersonal stress,  
11 improved mood). The findings from this study will help us to determine what sets  
12 resilient individuals apart on a neurobiological level. Such knowledge will be helpful to  
13 inform intervention strategies for individuals with a history of CA to prevent the  
14 development of mental health disorders, and ultimately increase resilience in individuals  
15 who have experienced adversity in early life.

## 26 **DATA SHARING**

27  
28  
29 Data will be available at the University of Cambridge Repository and accessed upon  
30 reasonable request.  
31

## 32 **AUTHOR CONTRIBUTIONS**

33  
34 Dr. Laura Moreno-López lead the recruitment and testing of participants and drafted the  
35 manuscript. Ms. Samantha N. Sallie, Konstantinos Ioannidis, Muzaffer Kaser, Katja  
36 Schueler, Adrian Dahl Askelund and Lorinda Turner were instrumental to the design of  
37 the study and reviewed the manuscript. The RAISE consortium members were or are  
38 instrumental to the setup and/or assessment of the RAISE study. Dr. Anne-Laura van  
39 Harmelen conceptualized and designed the study, drafted the original grant proposal,  
40 obtained financial support, oversaw all study procedures, and reviewed and revised this  
41 manuscript. All authors approved the final manuscript and agree to be accountable for  
42 all aspects of the work presented.  
43  
44  
45  
46  
47  
48  
49  
50  
51

## 52 **CONFLICTS OF INTEREST**

53  
54  
55 The authors declare that they have no conflicts of interest associated with this project.  
56  
57  
58  
59  
60

## FUNDING

The RAISE study is funded by two grants from the Royal Society to Dr. Anne-Laura van Harmelen (RGF\EA\180029 & RGF\R1\180064). This work was further supported by a Royal Society Dorothy Hodgkin fellowship for Dr Anne-Laura van Harmelen (DH150176) and a Wolfe Health fellowship for Dr. Laura Moreno-López.

## ACKNOWLEDGMENTS

The authors would like to thank the adolescents and young adults who participated in this project, as well as the research nurses at the Cambridge Clinical Research Facility (Addenbrooke's Hospital) for their contributions towards recruitment of study participants. They also are grateful to current and former members of the Risk and Resilience group who have contributed to this project.

## REFERENCES

1. Stoltenborgh M, Bakermans-Kranenburg MJ, Alink LRA, IJzendoorn MH van. The prevalence of child maltreatment across the globe: review of a series of meta-analyses. *Child Abuse Review*. 2015;24(1):37–50.
2. Child maltreatment [Internet]. [cited 2020 Apr 11]. Available from: <https://www.who.int/news-room/fact-sheets/detail/child-maltreatment>
3. Fritz J, de Graaff AM, Caisley H, van Harmelen A-L, Wilkinson PO. A systematic review of amenable resilience factors that moderate and/or mediate the relationship between childhood adversity and mental health in young people. *Front Psychiatry*. 2018;9:230.
4. Agnew-Blais J, Danese A. Childhood maltreatment and unfavourable clinical outcomes in bipolar disorder: a systematic review and meta-analysis. *The Lancet Psychiatry*. 2016;3(4):342–9.
5. Hazel NA, Hammen C, Brennan PA, Najman J. Early childhood adversity and adolescent depression: the mediating role of continued stress. *Psychological Medicine*. 2008;38(4):581–9.
6. Hawker DSJ, Boulton MJ. Twenty years' research on peer victimization and psychosocial maladjustment: a meta-analytic review of cross-sectional studies. *The Journal of Child Psychology and Psychiatry and Allied Disciplines*. 2000;41(4):441–55.
7. Iffland B, Sansen LM, Catani C, Neuner F. Emotional but not physical maltreatment is independently related to psychopathology in subjects with various degrees of social anxiety: a web-based internet survey. *BMC Psychiatry*. 2012;12:49.
8. Mullen PE, Martin JL, Anderson JC, Romans SE, Herbison GP. The long-term impact of the physical, emotional, and sexual abuse of children: a community study. *Child Abuse & Neglect*. 1996;20(1):7–21.
9. Spinhoven P, Elzinga BM, Hovens JGFM, Roelofs K, Zitman FG, van Oppen P, et al. The specificity of childhood adversities and negative life events across the life span to anxiety and depressive disorders. *Journal of Affective Disorders*. 2010;126(1):103–12.

10. Vachon DD, Krueger RF, Rogosch FA, Cicchetti D. Different forms of child maltreatment have comparable consequences among children from low-income families. *JAMA Psychiatry*. 2015;72(11):1135–42.
11. Wright MO, Crawford E, Del Castillo D. Childhood emotional maltreatment and later psychological distress among college students: the mediating role of maladaptive schemas. *Child Abuse & Neglect*. 2009;33(1):59–68.
12. Danese A, Pariante CM, Caspi A, Taylor A, Poulton R. Childhood maltreatment predicts adult inflammation in a life-course study. *PNAS*. 2007;104(4):1319–24.
13. Egeland B. Taking stock: Childhood emotional maltreatment and developmental psychopathology. *Child Abuse & Neglect*. 2009;33(1):22–6.
14. Majer M, Nater UM, Lin J-MS, Capuron L, Reeves WC. Association of childhood trauma with cognitive function in healthy adults: a pilot study. *BMC Neurology*. 2010;10(1):61.
15. Nanni V, Uher R, Danese A. Childhood maltreatment predicts unfavorable course of illness and treatment outcome in depression: a meta-analysis. *The American Journal of Psychiatry*. 2012;169(2):141–51.
16. Savitz JB, Merwe LVD, Stein DJ, Solms M, Ramesar RS. Neuropsychological task performance in bipolar spectrum illness: genetics, alcohol abuse, medication and childhood trauma. *Bipolar Disorders*. 2008;10(4):479–94.
17. Shaffer A, Yates TM, Egeland BR. The relation of emotional maltreatment to early adolescent competence: developmental processes in a prospective study. *Child Abuse & Neglect*. 2009;33(1):36–44.
18. Trickett PK, Mennen FE, Kim K, Sang J. Emotional abuse in a sample of multiply maltreated, urban young adolescents: issues of definition and identification. *Child Abuse & Neglect*. 2009;33(1):27–35.
19. Yates TM, Wekerle C. The long-term consequences of childhood emotional maltreatment on development: (mal)adaptation in adolescence and young adulthood. *Child Abuse & Neglect*. 2009;33(1):19–21.

- 1  
2  
3 20. Pongratz G, Straub RH. The sympathetic nervous response in inflammation.  
4 Arthritis Research & Therapy. 2014;16.  
5  
6
- 7  
8 21. Danese A, van Harmelen A-L. The hidden wounds of childhood trauma. European  
9 Journal of Psychotraumatology. 2017;8:137584.  
10
- 11  
12 22. Silverman MN, Sternberg EM. Glucocorticoid regulation of inflammation and its  
13 behavioral and metabolic correlates: from HPA axis to glucocorticoid receptor  
14 dysfunction. Annals of the New York Academy of Sciences. 2012;1261:55–63.  
15  
16
- 17  
18 23. Danese A, Baldwin JR. Hidden wounds? Inflammatory links between childhood  
19 trauma and psychopathology. Annual Review of Psychology. 2017;68(1):517–44.  
20  
21
- 22  
23 24. Nusslock R, Miller GE. Early-life adversity and physical and emotional health  
24 across the lifespan: a neuro-immune network hypothesis. Biological Psychiatry.  
25 2016;80(1):23–32.  
26  
27
- 28  
29 25. Vecchiarelli HA, Gandhi CP, Gray JM, Morena M, Hassan KI, Hill MN. Divergent  
30 responses of inflammatory mediators within the amygdala and medial prefrontal cortex  
31 to acute psychological stress. Brain, Behavior, and Immunity. 2016;51:70–91.  
32  
33
- 34  
35 26. Davidson RJ, Lewis DA, Alloy LB, Amaral DG, Bush G, Cohen JD, et al. Neural  
36 and behavioral substrates of mood and mood regulation. Biological Psychiatry.  
37 2002;52(6):478–502.  
38  
39
- 40  
41 27. Etkin A, Büchel C, Gross JJ. The neural bases of emotion regulation. Nature  
42 Reviews Neuroscience. 2015;16(11):693–700.  
43  
44
- 45  
46 28. Johnstone T, Reekum CM van, Urry HL, Kalin NH, Davidson RJ. Failure to  
47 regulate: counterproductive recruitment of top-down prefrontal-subcortical circuitry in  
48 major depression. The Journal of Neuroscience. 2007;27(33):8877–84.  
49  
50
- 51  
52 29. Kim MJ, Whalen PJ. The structural integrity of an amygdala–prefrontal pathway  
53 predicts trait anxiety. The Journal of Neuroscience. 2009;29(37):11614–8.  
54  
55
- 56  
57 30. Ochsner KN, Gross JJ. The cognitive control of emotion. Trends in Cognitive  
58 Sciences. 2005;9(5):242–9.  
59  
60

- 1  
2  
3 31. Wager TD, Davidson ML, Hughes BL, Lindquist MA, Ochsner KN. Neural  
4 mechanisms of emotion regulation: evidence for two independent prefrontal-subcortical  
5 pathways. *Neuron*. 2008;59(6):1037–50.  
6  
7  
8  
9 32. Davidovich S, Collishaw S, Thapar AK, Harold G, Thapar A, Rice F. Do better  
10 executive functions buffer the effect of current parental depression on adolescent  
11 depressive symptoms? *Journal of Affective Disorders*. 2016;199:54–64.  
12  
13  
14 33. Lissnyder ED, Koster EHW, Derakshan N, Raedt RD. The association between  
15 depressive symptoms and executive control impairments in response to emotional and  
16 non-emotional information. *Cognition and Emotion*. 2010;24(2):264–80.  
17  
18  
19 34. Roiser JP, Elliott R, Sahakian BJ. Cognitive mechanisms of treatment in depression.  
20 *Neuropsychopharmacology*. 2012;37(1):117–36.  
21  
22  
23 35. van Harmelen A-L, Kievit RA, Ioannidis K, Neufeld S, Jones PB, Bullmore E, et al.  
24 Adolescent friendships predict later resilient functioning across psychosocial domains in  
25 a healthy community cohort. *Psychological Medicine*. 2017;47(13):2312–22.  
26  
27  
28 36. Ioannidis K, Askelund AD, Kievit RA, van Harmelen A-L. The complex  
29 neurobiology of resilient functioning after childhood maltreatment. *BMC Medicine*.  
30 2020;18(1):32.  
31  
32  
33 37. Charney DS. Psychobiological mechanisms of resilience and vulnerability:  
34 implications for successful adaptation to extreme stress. *The American Journal of*  
35 *Psychiatry*. 2004;161(2):195–216.  
36  
37  
38 38. Russo SJ, Murrough JW, Han M, Charney DS, Nestler EJ. Neurobiology of  
39 resilience. *Nature Neuroscience*. 2012;15(11):1475–84.  
40  
41  
42 39. Chamberlain SR, Cavanagh J, de Boer P, Mondelli V, Jones DNC, Drevets WC, et  
43 al. Treatment-resistant depression and peripheral C-reactive protein. *The British Journal*  
44 *of Psychiatry*. 2019;214(1):11–9.  
45  
46  
47 40. Baumeister D, Akhtar R, Ciufolini S, Pariante CM, Mondelli V. Childhood trauma  
48 and adulthood inflammation: a meta-analysis of peripheral C-reactive protein,  
49 interleukin-6 and tumour necrosis factor- $\alpha$ . *Molecular Psychiatry*. 2016;21(5):642–9.  
50  
51  
52  
53  
54  
55  
56  
57  
58  
59  
60



- 1  
2  
3 41. Carpenter LL, Gawuga CE, Tyrka AR, Lee JK, Anderson GM, Price LH.  
4 Association between plasma IL-6 response to acute stress and early-life adversity in  
5 healthy adults. *Neuropsychopharmacology*. 2010;35(13):2617–23.  
6  
7  
8  
9 42. Danese A, Caspi A, Williams B, Ambler A, Sugden K, Mika J, et al. Biological  
10 embedding of stress through inflammation processes in childhood. *Molecular*  
11 *Psychiatry*. 2011;16(3):244–6.  
12  
13  
14  
15 43. Hartwell KJ, Moran-Santa Maria MM, Twal WO, Shaftman S, DeSantis SM,  
16 McRae-Clark AL, et al. Association of elevated cytokines with childhood adversity in a  
17 sample of healthy adults. *Journal of Psychiatric Research*. 2013;47(5):604–10.  
18  
19  
20  
21 44. Gunther Moor B, Güroğlu B, Op de Macks ZA, Rombouts SARB, Van der Molen  
22 MW, Crone EA. Social exclusion and punishment of excluders: neural correlates and  
23 developmental trajectories. *NeuroImage*. 2012;59(1):708–17.  
24  
25  
26  
27 45. van Harmelen A-L, Hauber K, Gunther Moor B, Spinhoven P, Boon AE, Crone EA,  
28 et al. Childhood emotional maltreatment severity is associated with dorsal medial  
29 prefrontal cortex responsivity to social exclusion in young adults. *PLoS One*. 2014;9(1).  
30  
31  
32  
33 46. van Harmelen A-L, van Tol M-J, Dalgleish T, van der Wee NJA, Veltman DJ,  
34 Aleman A, et al. Hypoactive medial prefrontal cortex functioning in adults reporting  
35 childhood emotional maltreatment. *Social Cognitive and Affective Neuroscience*.  
36 2014;9(12):2026–33.  
37  
38  
39  
40  
41 47. Gee DG, Gabard-Durnam LJ, Flannery J, Goff B, Humphreys KL, Telzer EH, et al.  
42 Early developmental emergence of human amygdala–prefrontal connectivity after  
43 maternal deprivation. *PNAS*. 2013;110(39):15638–43.  
44  
45  
46  
47 48. Mehta MA, Golembo NI, Nosarti C, Colvert E, Mota A, Williams SCR, et al.  
48 Amygdala, hippocampal and corpus callosum size following severe early institutional  
49 deprivation: the English and Romanian adoptees study pilot. *Journal of Child*  
50 *Psychology and Psychiatry*. 2009;50(8):943–51.  
51  
52  
53  
54 49. Morey RA, Haswell CC, Hooper SR, De Bellis MD. Amygdala, hippocampus, and  
55 ventral medial prefrontal cortex volumes differ in maltreated youth with and without  
56 chronic posttraumatic stress disorder. *Neuropsychopharmacology*. 2016;41(3):791–801.  
57  
58  
59  
60

- 1  
2  
3 50. Thomaes K, Dorrepaal E, Draijer N, Ruiter MB de, Balkom AJ van, Smit JH, et al.  
4 Reduced anterior cingulate and orbitofrontal volumes in child abuse-related complex  
5 PTSD. *The Journal of Clinical Psychiatry*. 2010;71(12):1636–44.  
6  
7  
8  
9 51. Tottenham N, Hare TA, Quinn BT, McCarry TW, Nurse M, Gilhooly T, et al.  
10 Prolonged institutional rearing is associated with atypically larger amygdala volume and  
11 difficulties in emotion regulation. *Developmental Science*. 2010;13(1):46.  
12  
13  
14  
15 52. Rooij SJH van, Kennis M, Sjouwerman R, Heuvel MP van den, Kahn RS, Geuze E.  
16 Smaller hippocampal volume as a vulnerability factor for the persistence of post-  
17 traumatic stress disorder. *Psychological Medicine*. 2015;45(13):2737–46.  
18  
19  
20  
21 53. Vythilingam M, Heim C, Newport J, Miller AH, Anderson E, Bronen R, et al.  
22 Childhood trauma associated with smaller hippocampal volume in women with major  
23 depression. *The American Journal of Psychiatry*. 2002;159(12):2072–80.  
24  
25  
26  
27 54. Whittle S, Dennison M, Vijayakumar N, Simmons JG, Yücel M, Lubman DI, et al.  
28 Childhood maltreatment and psychopathology affect brain development during  
29 adolescence. *Journal of the American Academy of Child & Adolescent Psychiatry*.  
30 2013;52(9):940-952.e1.  
31  
32  
33  
34  
35 55. Gee DG, Gabard-Durnam L, Telzer EH, Humphreys KL, Goff B, Shapiro M, et al.  
36 Maternal buffering of human amygdala–prefrontal circuitry during childhood but not  
37 adolescence. *Psychological Science*. 2014;25(11):2067–78.  
38  
39  
40  
41  
42 56. Hartmann Rasmussen LJ, Moffitt TE, Eugen-Olsen J, Belsky DW, Danese A,  
43 Harrington H, et al. Cumulative childhood risk is associated with a new measure of  
44 chronic inflammation in adulthood. *Journal of Child Psychology and Psychiatry, and  
45 allied disciplines*. 2019;60(2):199–208.  
46  
47  
48  
49 57. Schönbrodt FD, Perugini M. At what sample size do correlations stabilize? *Journal  
50 of Research in Personality*. 2013;47(5):609–12.  
51  
52  
53  
54 58. Angold A, Costello EJ, Messer SC, Pickles A. Development of a short questionnaire  
55 for use in epidemiological studies of depression in children and adolescents.  
56  
57  
58  
59  
60 *International Journal of Methods in Psychiatric Research*. 1995;5(4):237–49.

- 1  
2  
3 59. Reynolds CR, Richmond BO. What I think and feel: a revised measure of children's  
4 manifest anxiety. *Journal of Abnormal Child Psychology*. 1978;6(2):271–80.  
5  
6  
7  
8 60. Bamber D, Tamplin A, Park RJ, Kyte ZA, Goodyer IM. Development of a Short  
9 Leyton Obsessional Inventory for children and adolescents. *Journal of the American*  
10 *Academy of Child & Adolescent Psychiatry*. 2002;41(10):1246–52.  
11  
12  
13  
14 61. Kessler RC, Andrews G, Colpe LJ, Hiripi E, Mroczek DK, Normand S-LT, et al.  
15 Short screening scales to monitor population prevalences and trends in non-specific  
16 psychological distress. *Psychological Medicine*. 2002;32(6):959–76.  
17  
18  
19  
20 62. Tennant R, Hiller L, Fishwick R, Platt S, Joseph S, Weich S, et al. The Warwick-  
21 Edinburgh Mental Well-being Scale (WEMWBS): development and UK validation.  
22 *Health and Quality of Life Outcomes*. 2007;5(1):63.  
23  
24  
25  
26 63. Parker G, Roussos J, Hadzi-Pavlovic D, Mitchell P, Wilhelm K, Austin M-P. The  
27 development of a refined measure of dysfunctional parenting and assessment of its  
28 relevance in patients with affective disorders. *Psychological Medicine*.  
29 1997;27(5):1193–203.  
30  
31  
32  
33  
34 64. Elgar FJ, Waschbusch DA, Dadds MR, Sigvaldason N. Development and validation  
35 of a short form of the Alabama Parenting Questionnaire. *Journal of Child and Family*  
36 *Studies*. 2007;16(2):243–59.  
37  
38  
39  
40 65. Epstein NB, Baldwin LM, Bishop DS. The McMaster Family Assessment Device.  
41 *Journal of Marital and Family Therapy*. 1983;9(2):171–80.  
42  
43  
44  
45 66. Miller IW, Epstein NB, Bishop DS, Keitner GI. The McMaster Family Assessment  
46 Device: reliability and validity. *Journal of Marital and Family Therapy*.  
47 1985;11(4):345–56.  
48  
49  
50  
51 67. Petersen W. *Society and the Adolescent Self-Image*. Morris Rosenberg. Princeton  
52 University Press, Princeton, N.J., 1965.  
53  
54  
55 68. Bernstein DP, Fink L, Handelsman L, Foote J, Lovejoy M, Wenzel K, et al. Initial  
56 reliability and validity of a new retrospective measure of child abuse and neglect. *The*  
57 *American Journal of Psychiatry*. 1994;151(8):1132–6.  
58  
59  
60

- 1  
2  
3 69. Cassels M, van Harmelen A, Neufeld S, Goodyer I, Jones PB, Wilkinson P. Poor  
4 family functioning mediates the link between childhood adversity and adolescent  
5 nonsuicidal self-injury. *Journal of Child Psychology and Psychiatry, and allied*  
6 *disciplines*. 2018;59(8):881–7.  
7  
8  
9  
10  
11 70. Preston SD, Stansfield RB. I know how you feel: Task-irrelevant facial expressions  
12 are spontaneously processed at a semantic level. *Cognitive, Affective, & Behavioral*  
13 *Neuroscience*. 2008;8(1):54–64.  
14  
15  
16  
17 71. Kanske P, Heissler J, Schönfelder S, Bongers A, Wessa M. How to regulate  
18 emotion? Neural networks for reappraisal and distraction. *Cerebral Cortex*.  
19 2011;21(6):1379–88.  
20  
21  
22  
23 72. Zhou X, Fragala MS, McElhaney JE, Kuchel GA. Conceptual and methodological  
24 issues relevant to cytokine and inflammatory marker measurements in clinical research.  
25 *Current Opinion in Clinical Nutrition and Metabolic Care*. 2010;13(5):541–7.  
26  
27  
28  
29 73. Sheehan DV, Lecrubier Y, Sheehan KH, Amorim P, Janavs J, Weiller E, et al. The  
30 Mini-International Neuropsychiatric Interview (M.I.N.I.): the development and  
31 validation of a structured diagnostic psychiatric interview for DSM-IV and ICD-10. *The*  
32 *Journal of Clinical Psychiatry*. 1998;59(suppl 20):22–33.  
33  
34  
35  
36  
37 74. Oldfield RC. The assessment and analysis of handedness: The Edinburgh inventory.  
38 *Neuropsychologia*. 1971;9(1):97–113.  
39  
40  
41  
42 75. Cleghorn CL, Harrison RA, Ransley JK, Wilkinson S, Thomas J, Cade JE. Can a  
43 dietary quality score derived from a short-form FFQ assess dietary quality in UK adult  
44 population surveys? *Public Health Nutrition*. 2016;19(16):2915–23.  
45  
46  
47  
48 76. Wechsler, D. (1999). *Wechsler Abbreviated Scale of Intelligence*. San Antonio, TX:  
49 The Psychological Corporation.  
50  
51  
52 77. Spielberger C, Gorsuch R, Lushene R, Vagg P, Jacobs G. *Manual for the State-Trait*  
53 *Anxiety Inventory*. Palo Alto, CA: Consulting Psychologists Press 1983.  
54  
55  
56  
57 78. Dedovic K, Renwick R, Mahani NK, Engert V, Lupien SJ, Pruessner JC. The  
58 Montreal Imaging Stress Task: using functional imaging to investigate the effects of  
59  
60

- 1  
2  
3 perceiving and processing psychosocial stress in the human brain. *The Journal of*  
4 *Psychiatry & Neuroscience*. 2005;30(5):319–25.  
5  
6  
7  
8 79. Goodyer IM, Herbert J, Tamplin A, Secher SM, Pearson J. Short-term outcome of  
9 major depression: II. Life events, family dysfunction, and friendship difficulties as  
10 predictors of persistent disorder. *Journal of the American Academy of Child &*  
11 *Adolescent Psychiatry*. 1997;36(4):474–80.  
12  
13  
14  
15 80. Cohen S, Kamarck T, Mermelstein R. A Global Measure of Perceived Stress.  
16 *Journal of Health and Social Behavior*. 1983;24(4):385–96.  
17  
18  
19  
20 81. Harb GC, Heimberg RG, Fresco DM, Schneier FR, Liebowitz MR. The  
21 psychometric properties of the Interpersonal Sensitivity Measure in social anxiety  
22 disorder. *Behaviour Research and Therapy*. 2002;40(8):961–79.  
23  
24  
25  
26 82. Treynor W, Gonzalez R, Nolen-Hoeksema S. Rumination reconsidered: a  
27 psychometric analysis. *Cognitive Therapy and Research*. 2003;27(3):247–59.  
28  
29  
30  
31 83. Bellingrath S, Rohleder N, Kudielka BM. Effort–reward-imbalance in healthy  
32 teachers is associated with higher LPS-stimulated production and lower glucocorticoid  
33 sensitivity of interleukin-6 in vitro. *Biological Psychology*. 2013;92(2):403–9.  
34  
35  
36  
37 84. Decker M-L, Grobusch MP, Ritz N. Influence of age and other factors on cytokine  
38 expression profiles in healthy children—a systematic review. *Frontiers in Pediatrics*.  
39 2017;5.  
40  
41  
42  
43 85. DeRijk RH, Petrides J, Deuster P, Gold PW, Sternberg EM. Changes in  
44 corticosteroid sensitivity of peripheral blood lymphocytes after strenuous exercise in  
45 humans. *The Journal of Clinical Endocrinology and Metabolism*. 1996;81(1):228–35.  
46  
47  
48  
49 86. Khoury JE, Gonzalez A, Levitan RD, Pruessner JC, Chopra K, Basile VS, et al.  
50 Summary cortisol reactivity indicators: interrelations and meaning. *Neurobiology of*  
51 *Stress*. 2015;2:34–43.  
52  
53  
54  
55 87. Fekedulegn DB, Andrew ME, Burchfiel CM, Violanti JM, Hartley TA, Charles LE,  
56 et al. Area under the curve and other summary indicators of repeated waking cortisol  
57 measurements. *Psychosomatic Medicine*. 2007;69(7):651–659.  
58  
59  
60

**RAISE Consortium list of authors:**

Alicia J. Smith<sup>1,2</sup>, Camilla Nord<sup>2</sup>, Eugenia M. Davidson<sup>1</sup>, Nadia González-García<sup>3</sup>,  
Oksana Berhe<sup>4</sup>, Paul Fletcher<sup>1,5</sup>, Paul Wilkinson<sup>1,5</sup>, Rosalie Shrofer<sup>1</sup>, Sofía Orellana<sup>1</sup>,  
Sophie L. Bellow<sup>1</sup>, Suzanne Schweizer<sup>2,6</sup>

<sup>1</sup> Department of Psychiatry, University of Cambridge, UK.

<sup>2</sup> Medical Research Council Cognition and Brain Sciences Unit, University of Cambridge, UK.

<sup>3</sup> Hospital Infantil de México Federico Gómez. Laboratorio de Neurociencias, Ciudad de México, México.

<sup>4</sup> Department of Psychiatry and Psychotherapy, Central Institute of Mental Health, Medical Faculty Mannheim, University of Heidelberg, Mannheim, Germany.

<sup>5</sup> Cambridgeshire and Peterborough NHS Foundation Trust, Fulbourn, United Kingdom

<sup>6</sup> Institute of Cognitive Neuroscience, University College London, London, UK.

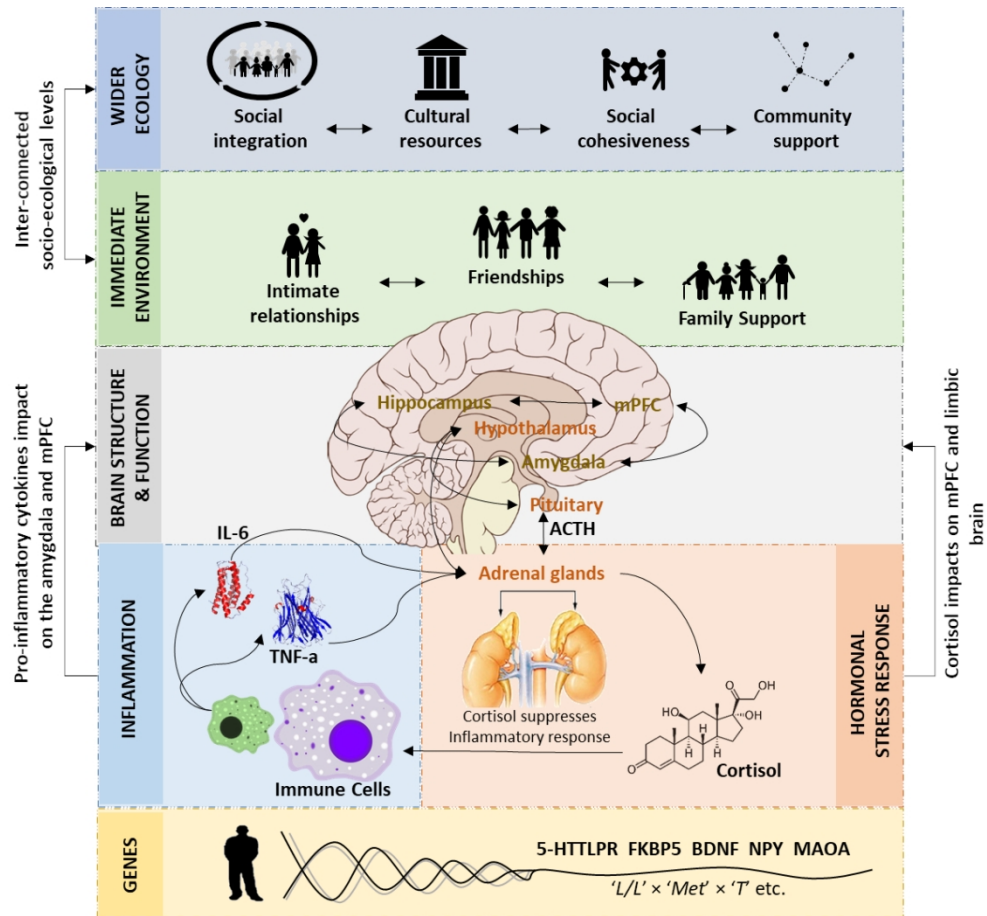

Figure 1. The complex neurobiology of resilience after childhood maltreatment (CM) (36). Resilient functioning in those individuals who have experienced CM may be facilitated by larger prefrontal cortex (PFC) and hippocampal volume and connectivity, the ability to adequately regulate emotions and dampen stress reactivity, cortisol and proinflammatory baseline and responses, polygenic resilience effects, social support from the immediate environment, and the wider ecology. For readability, the location of the hippocampus is not correct. 5-HTTLPR serotonin-transporter-linked polymorphic region, ACTH adrenocorticotropic hormone; BDNF brain-derived neurotrophic factor, FKBP5 FK binding protein 5, IL-6 interleukin 6, MAOA monoamine oxidase A, mPFC medial PFC, NPY neuropeptide-Y, TNF $\alpha$ , tumour necrosis factor- $\alpha$ .



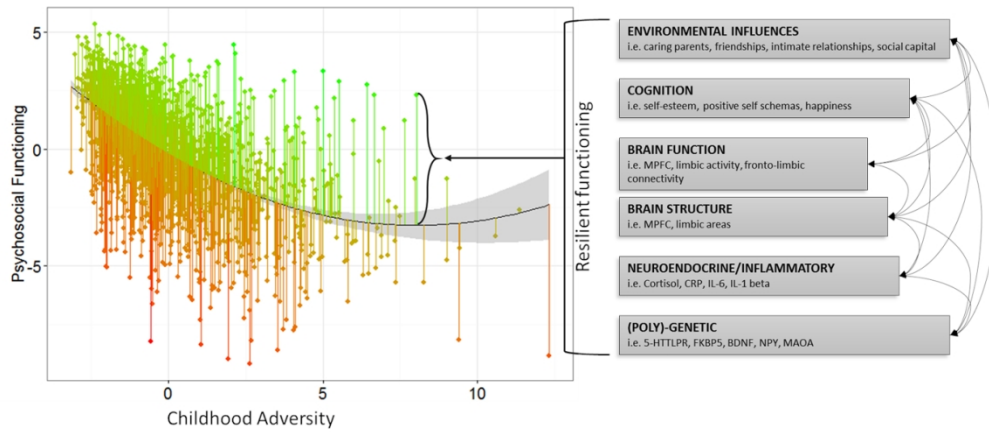

Figure 2. Risk to Resilient functioning in the NSPN sample of N=1980 adolescents (35). Green and red lines indicate functioning that is better or 'resilient' (green) or worse 'vulnerable' (red) than expected. Psychosocial functioning reflects a factor score (mean=0, SD=1) derived from multiple measures of psychiatric symptomatology, personality traits, and mental wellbeing. CA reflects a factor score (mean=0, SD=1) from two measures which assess early life family experiences.



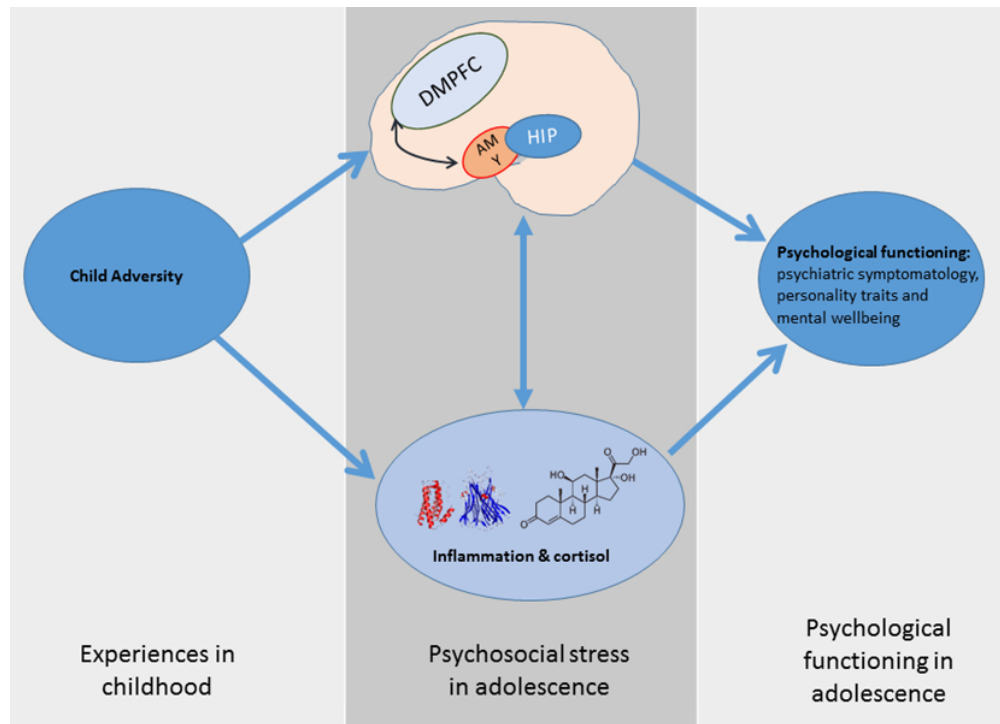

Figure 3. The neuro-immune network hypothesis of child maltreatment. Inflammatory protein and brain responses to psychosocial stress mediate the relationship between CA and psychological functioning.

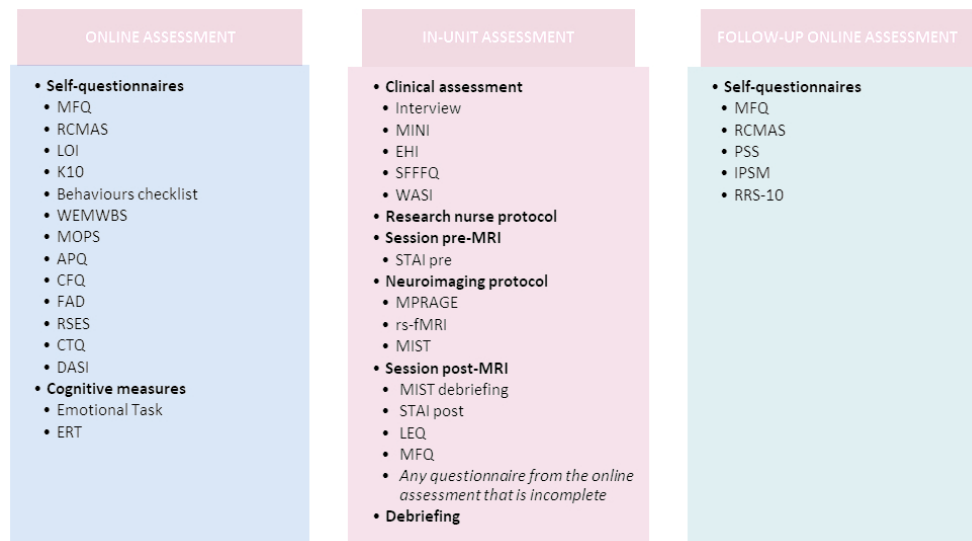

Figure 4. Summary of the study protocol. Abbreviations: APQ=Alabama Parenting Questionnaire, CFQ=Cambridge Friendship Questionnaire, CTQ=Childhood Trauma Questionnaire, DASi=Drugs Alcohol and Self-Injury, EHI=Edinburgh Handedness Inventory, ERT=Emotion Regulation Task, FAD=Family Assessment Device, IPSM=Interpersonal Sensitivity Measure, K10=Kessler Psychological Distress Scale, LEQ=Life-Events Questionnaire, LOI=Leyton Obsessional Inventory, MFQ=Mood and Feelings Questionnaire, MINI=Mini-International Neuropsychiatric Interview, MIST=Montreal Imaging Stress Task, MOPS=Measure of Parenting Style, MPRAGE=T1-Weighted rapid three-dimensional gradient-echo, PSS=Perceived Stress Scale, RCMAS=Revised Children's Manifest Anxiety Scale, RRS-10=Ruminative Response Scale, RSES=Rosenberg Self-Esteem Scale, rs-fMRI=Resting state functional magnetic resonance imaging, SFFFQ=Short-Form Frequency Food Questionnaire, STAI=State-Trait Anxiety Inventory, WASI>Wechsler Abbreviated Scale of Intelligence, WEMWBS=Warwick-Edinburgh Mental Well-Being Scale.

1  
2  
3  
4  
5  
6  
7  
8  
9  
10  
11  
12  
13  
14  
15  
16  
17  
18  
19  
20  
21  
22  
23  
24  
25  
26  
27  
28  
29  
30  
31  
32  
33  
34  
35  
36  
37  
38  
39  
40  
41  
42  
43  
44  
45  
46  
47  
48  
49  
50  
51  
52  
53  
54  
55  
56  
57  
58  
59  
60

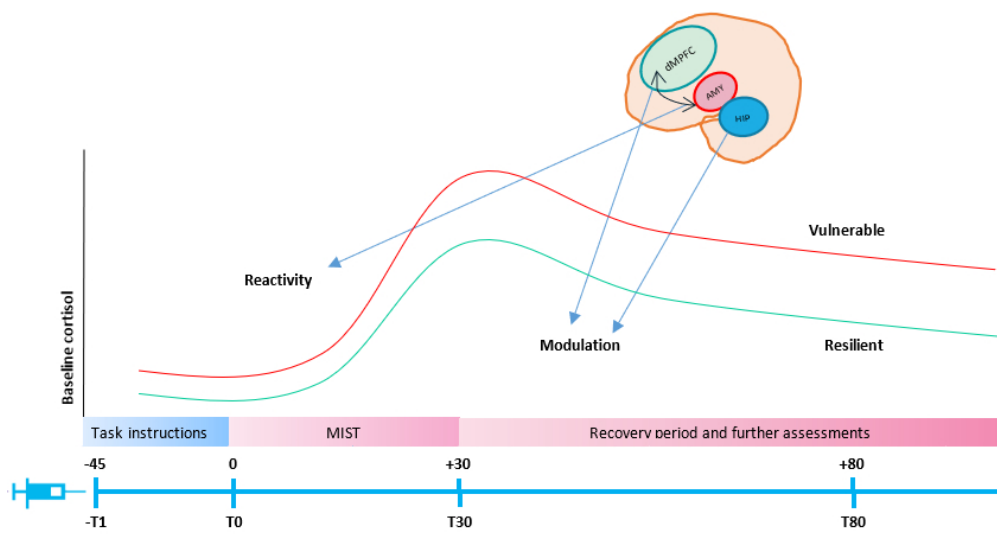

Figure 5. Venepuncture protocol. Bloods will be acquired at 4 time points: (-T1) 45 min before the start of the task, (T0) Just before the start of the task (T30) right after the start of the task, (T80) 80 min after the start of the task.

## Supplementary Material

### The RAISE study protocol; a cross-sectional, multi-level, neurobiological study of studying resilience after individual stress exposure

Laura Moreno-López<sup>1,\*</sup>, Samantha N. Sallie<sup>2</sup>, Konstantinos Ioannidis<sup>3,4</sup>, Muzaffer Kaser<sup>5,6</sup>, Katja Schueler<sup>7</sup>, Adrian Dahl Askelund<sup>8</sup>, Lorinda Turner<sup>9</sup>, RAISE Consortium, & Anne-Laura van Harmelen<sup>10,\*</sup>

#### Contents

|                                       |    |
|---------------------------------------|----|
| Measures used in Phase I.....         | 2  |
| Psychological functioning .....       | 2  |
| Child adversity.....                  | 4  |
| Cognitive functioning.....            | 4  |
| Measures used in Phase II .....       | 5  |
| Clinical evaluation.....              | 5  |
| Neuroimaging protocol.....            | 6  |
| Measures used in Phase III.....       | 7  |
| Risk and ethical issues.....          | 9  |
| Consent.....                          | 9  |
| Confidentiality.....                  | 9  |
| Risks and cost of participation ..... | 10 |
| Compensation for participation.....   | 12 |
| References .....                      | 13 |

## Measures used in Phase I

### Psychological functioning

*Mood and Feelings Questionnaire.* The Mood and Feelings Questionnaire (MFQ; Angold et al., 1995) is a 33-item instrument that was developed to measure depressive symptoms (over the course of two weeks prior and up to the date of the assessment) in children and adolescents from 8- to 18-year-olds. The MFQ has shown prognostic validity in clinical and non-clinical samples (Daviss et al., 2006; Wood et al., 1995). Higher sum scores indicate more symptoms.

*Revised Children's Manifest Anxiety Scale.* The Revised Children's Manifest Anxiety Scale (RCMAS; Reynolds & Richmond, 1978) is a 37-item questionnaire that includes three anxiety factors (physiological anxiety, worry/oversensitivity, and social concerns/concentration), as well as a total anxiety score. A higher score indicates a high level of anxiety.

*Leyton Obsessional Inventory.* The Leyton Obsessional Inventory (LOI; Bamber et al., 2002) is an 11-item questionnaire that measures obsessional/anxiety symptoms. Responses ranged from 'always,' 'mostly,' 'sometimes,' to 'never.' Higher scores indicate more obsessions.

*Kessler Psychological Distress Scale.* The 10-item version of the Kessler Psychological Distress Scale (K10; Kessler et al., 2002) measures frequency of nervousness, hopelessness, sadness, worthlessness, and fatigue. Responses are summed to create a total score, with higher scores signifying more psychological distress.

*Behaviours checklist.* The Behaviours Checklist (BC) is an 11-item questionnaire for symptoms of antisocial behaviour based on the Diagnostic and Statistical Manual (DSM-IV) conduct disorder definition. This measure has not been previously published but the results of previous analysis showed that its internal consistency was good at baseline (Cronbach's alpha=0.74) (van Harmelen et al., 2017). A high score indicates greater emotional and behavioural problems.

*Warwick-Edinburgh Mental Well-being Scale.* The Warwick-Edinburgh Mental Well-being Scale (WEMWBS; Tennant et al., 2007) was developed to enable the monitoring

1  
2  
3 of mental wellbeing in the general population; and the evaluation of projects, programs,  
4 and policies aiming to improve mental wellbeing in the UK. It comprises 14 positively  
5 worded statements with five response categories from 'none of the time' to 'all of the  
6 time.' Higher scores indicate better mental well-being.  
7  
8  
9

10  
11 *Cambridge Friendship Questionnaire.* The Cambridge Friendship Questionnaire (CFQ)  
12 is an 8-item questionnaire assessing the number, availability, and quality of friendships.  
13 Higher scores indicate better perceived overall quality of friendships. The CFQ has  
14 good measurement invariance and external validity, and has demonstrated ecological  
15 validity across two samples (van Harmelen et al., 2016).  
16  
17  
18  
19

20  
21 *Family Assessment Device.* The Family Assessment Device (FAD; Epstein et al., 1983;  
22 Miller et al., 1985) is a 12-item scale measuring overall functioning of the family. Six  
23 items describe healthy functioning and the other six describe unhealthy functioning.  
24 Each item is rated on a 4-point Likert scale (4='strongly agree,' 3='agree,' 2='disagree,'  
25 1='strongly disagree'). The higher the score the worse the family functioning.  
26  
27  
28  
29

30  
31 *Rosenberg Self-Esteem Scale.* The Rosenberg Self-Esteem Scale (RSES; Petersen,  
32 1975) is a 10-item scale that measures positive and negative feelings of self-worth. All  
33 items are answered using a 4-point Likert scale format ranging from strongly agree to  
34 strongly disagree. Lower scores indicate lower self-esteem.  
35  
36  
37

38  
39 *Childhood Trauma Questionnaire.* The Childhood Trauma Questionnaire (CTQ;  
40 Bernstein et al., 1994) is a standardised, retrospective 28-item self-report inventory that  
41 measures the severity of different types of childhood trauma, producing five clinical  
42 subscales: emotional abuse, physical abuse, sexual abuse, emotional neglect, and  
43 physical neglect. Participants respond to each item in the context of 'when you were  
44 growing up' and answer according to a 5-point Likert scale ranging from 1='never' to  
45 5='very often.' The score ranges from 5 to 25 for each subscale, with scores falling into  
46 four categories: none to low trauma exposure, low to moderate trauma exposure,  
47 moderate to severe trauma exposure, and severe to extreme trauma exposure. The  
48 measure also includes a 3-item minimisation/denial scale indicating the potential  
49 underreporting of maltreatment.  
50  
51  
52  
53  
54  
55  
56  
57  
58  
59  
60

1  
2  
3 *Drugs Alcohol and Self-injury*. The drugs, alcohol, and self-injury inventory (DASI;  
4 Cassels et al., 2018) is a 14-item self-report measure of cigarette, alcohol, and drug use,  
5 and non-suicidal self-injury.  
6  
7

### 8 9 **Child adversity**

10  
11 *Measure of Parenting Style*. The Measure of Parenting Style (MOPS; Parker et al.,  
12 1997) is a questionnaire designed to assess different approaches to parenting during the  
13 first 16 years of life. Participants have to evaluate each parent based on 15 statements  
14 (e.g., ‘overprotective of me’ and ‘uncaring of me’) using a four-point scale, yielding  
15 total scores for each parent on subscales labelled ‘indifference,’ ‘abuse,’ and ‘over-  
16 control.’ The sum scores of items in each category indicate the degree to which that  
17 parenting style was experienced by an individual.  
18

19 *The Alabama Parenting Questionnaire*. The Alabama Parenting Questionnaire (APQ;  
20 Elgar et al., 2007) measures parenting practices. Participants are asked to rate how  
21 frequently each behaviour occurred in their family home on a 5-point scale ranging  
22 from ‘never’ to ‘always.’ High scores can indicate positive (i.e., involvement) or  
23 negative (i.e., inconsistent discipline, poor supervision, corporal punishment) parenting.  
24  
25

### 26 27 **Cognitive functioning**

28  
29 *Emotional Stroop task*. In this task, participants have to categorise an adjective as angry,  
30 happy, or sad while ignoring the valence of the expression on a face upon which the  
31 adjective is superimposed (Preston & Stansfield, 2008). There are three blocks of trials:  
32 words only (32 trials), faces only (32 trials), and words and faces combined (64 trials).  
33 In the word-only block, the stimulus is one of the four emotion words (HAPPY, SAD,  
34 ANGRY, or SCARED; 8 trials each). In the face-only block, the stimulus is 1 of 16  
35 pictures of facial affect (Ekman & Friesen, 1976), each appearing twice. The 16 pictures  
36 consist of 1 picture displaying each of the four emotions (happy, sad, angry, and scared)  
37 from each of four actors (older man, younger man, blonde woman, and brunette  
38 woman). In the word-and-face block, the stimulus is 1 of the same 16 faces with one of  
39 the four emotion words superimposed semi-transparently (89% transparent) over the  
40 face, centred vertically on the nose. On 48 trials in the word-and-face block, the facial  
41 expression matched the word (congruent trials—12 repetitions of each word matched to  
42 three iterations of each of the four actors expressing that emotion). On the other 16  
43  
44  
45  
46  
47  
48  
49  
50  
51  
52  
53  
54  
55  
56  
57  
58  
59  
60

1  
2  
3 trials, the facial expression did not match the word (incongruent trials—4 repetitions of  
4 each word matched at random to one of the possible remaining incongruent facial  
5 expressions). The emotional Stroop task generates two indices of affective executive  
6 control: the incongruency index and the congruency index. The incongruency index is  
7 the cost in reaction time to correctly categorize an emotional adjective when the  
8 background face depicts an incongruent emotional expression relative to when the face  
9 depicts a neutral emotional expression. The congruency index reflects the facilitation in  
10 reaction time to categorize an emotional adjective when the background face depicts a  
11 congruent facial expression relative to the neutral condition.  
12  
13  
14  
15  
16  
17  
18

19  
20 *Emotion Regulation task.* This task assesses the use of two strategies of cognitive  
21 emotion regulation: reappraisal and attentional control (i.e., distraction) (Kanske et al.,  
22 2011). Participants view neutral or negative emotional pictures on the screen one by  
23 one. After a short time, a text instruction appears on the screen to either ‘View,’  
24 ‘Reappraise,’ or ‘Distract’ the emotion elicited by the current picture. Each picture  
25 appears in nearly every condition for approximately 6 seconds (in total, 128 trials). The  
26 ‘View’ condition refers to not regulating the emotional response to the picture at all.  
27 ‘Reappraisal’ means attenuating the initial emotional response by finding alternative  
28 interpretations of the picture. During ‘Distraction’ trials, a simple arithmetic task  
29 appears on the screen to which participants can then shift their attention in order to  
30 downregulate their emotions. After each trial, participants rate their current emotional  
31 state using the Self-Assessment Manikin (SAM). This task provides indices of  
32 individual general emotional reactivity, reappraisal effects and distraction effects.  
33 Scores are derived from rating differences between emotional categories and emotion  
34 regulation conditions.  
35  
36  
37  
38  
39  
40  
41  
42  
43  
44  
45

## 46 Measures used in Phase II

### 47 48 49 **Clinical evaluation**

50  
51  
52 *Mini-International Neuropsychiatric Interview.* The Mini-International  
53 Neuropsychiatric Interview (MINI) was developed by Sheehan and Lecrubier (Sheehan  
54 et al., 1998) to meet the need for a brief, reliable, and valid structured diagnostic  
55 interview. The MINI contains 130 questions that assess 16 axis I DSM-IV disorders and  
56 is organised in diagnostic modules. For most modules, two to four screening questions  
57  
58  
59  
60



1  
2  
3 are used to rule out the diagnosis when answered negatively. Positive responses to  
4 screening questions are explored by further investigation of other diagnostic criteria  
5 (according to the standard MINI assessment protocol).  
6  
7

8  
9 *Edinburgh Handedness Inventory.* The Edinburgh handedness inventory is an  
10 instrument used to assess the dominance of a person's hand in everyday activities  
11 (Oldfield, 1971). We will use the self-administered version.  
12  
13

14  
15 *Short-form Frequency Food Questionnaire.* The Short-form Frequency Food  
16 questionnaire (SFFFQ; Cleghorn et al., 1016) is a measure of the quality of dietary  
17 habits. It evaluates the consume of 25 items including fruit, vegetables, fibre-rich foods,  
18 high fat and high-sugar foods, meat, meat products, and fish. The participants are asked  
19 to tick one option (ranging from 'rarely' to '5+ a day') for each of the items.  
20  
21  
22  
23

24  
25 *Wechsler Abbreviated Scale of Intelligence.* The Wechsler Abbreviated Scale of  
26 Intelligence (WASI; Wechsler, 1999) is a short measure of IQ composed by four  
27 subtests: Vocabulary, Block Design, Similarities and Matrix Reasoning. We will use the  
28 subtests Vocabulary and Matrix reasoning to estimate the IQ of each participants.  
29  
30  
31

### 32 **Neuroimaging protocol**

33  
34  
35  
36 *The State-Trait Anxiety Inventory (STAI;* Spielberger et al., 1983) is a measure of state  
37 and trait anxiety that includes items such as: 'I am tense,' 'I am worried,' 'I feel calm,'  
38 and 'I feel secure.' All items are rated on a 4-point scale (e.g., from 'Almost Never' to  
39 'Almost Always'). Higher scores indicate greater anxiety. Internal consistency  
40 coefficients for the scale have ranged from 0.86 to 0.95.  
41  
42  
43

44  
45 *Montreal Imaging Stress Task (30 mins).* We will use a modified version of the  
46 Montreal imaging stress task (MIST; Dedovic et al., 2005). This task comprises a series  
47 of computerized mental arithmetic tasks with an induced failure component. The  
48 protocol consists of a training session conducted outside the imaging unit, and a test  
49 session during which the functional images are acquired. Please see the Supplementary  
50 Material for a description of the paradigm. The test session has two runs. Each run has  
51 three conditions: rest, control, and experimental. During the experimental session, the  
52 program is set to a time limit that is 10% less than the subject's average response time  
53 recorded during the training session. This approach induces a high failure rate. In  
54  
55  
56  
57  
58  
59  
60

1  
2  
3 addition, the program continuously records the participant's average response time and  
4 the number of correct responses. If the participant answers a series of 3 consecutive  
5 mental arithmetic tasks correctly, the program reduces the time limit to 10% less than  
6 the average time for the 3 correctly solved tasks. Conversely, if the subject answers a  
7 series of 3 consecutive tasks incorrectly, the program increases the time limit for the  
8 following tasks by 10%. As such, under experimental conditions, a range of about 20%  
9 to 45% correct answers is enforced (Figure S1). Moreover, between experimental runs,  
10 the participant will see a screen with information about their performance, reminding  
11 them that the average performance is about 80%–90% correct answers and that they  
12 must improve their performance. During the control condition, mental arithmetic is  
13 presented with the same level of difficulty and at the same frequency as during the  
14 experimental sessions, but no time restriction is enforced, and individual performance  
15 and average users' performance are not displayed. Feedback (“correct” or “incorrect”) is  
16 still shown after each task, but because of the absence of a time limit, average  
17 performance increases to about 90%. Finally, during the rest condition, the interface of  
18 the computer program remains on the screen, but no tasks are shown. After the first run,  
19 a member of the radiographer team will show disappointment about the participant’s  
20 performance and ask him/her to try harder (e.g., “You are not doing as well as we had  
21 hoped”, “Please remember that your performance needs to be close to the average to  
22 allow us to use your data”, “Let’s try it again” etc.).

23  
24  
25  
26  
27  
28  
29  
30  
31  
32  
33  
34  
35  
36  
37  
38  
39  
40  
41  
42  
43  
44  
45  
46  
47  
48  
49  
50  
51  
52  
53  
54  
55  
56  
57  
58  
59  
60  
*The Life-Events Questionnaire* evaluates recent undesirable and desirable life events and  
friendships (LEQ; Goodyer et al., 1997). Participants are asked to rate 13 major life  
events during the preceding 12-month period that may have affected them. These may  
include changes in school, deaths, household disasters, friendship difficulties, and  
illnesses. Respondents are asked how they felt about the event on a scale of 1=‘very  
pleasant/happy’ to 5=‘very unpleasant/sad/painful.’ A quantitative estimate of the  
adverse life events is obtained by summarising the number of events rated either 4 or 5  
for more than two weeks.

### Measures used in Phase III

*Perceived Stress Scale.* The Perceived Stress Scale (PSS; Cohen et al., 1983) is the most  
widely used psychological instrument for measuring the perception of stress. This 10-  
item scale measures the degree to which situations in one’s life are appraised as

stressful. Items are designed to tap how unpredictable, uncontrollable, and overloaded respondents find their lives. The scale also includes direct queries about current levels of experienced stress. Scores can range from 0-40 with higher scores indicating higher perceived stress.

*Interpersonal Sensitivity Measure.* The Interpersonal Sensitivity Measure (IPSM; Harb et al., 2002) is a 28-item scale that assesses excessive sensitivity to the interpersonal behaviour of others, social feedback, and (perceived or actual) negative evaluation by others. The measure includes a total score and three subscale scores: interpersonal worry and dependency (eleven items; e.g., 'I worry about what others think of me'), low self-esteem (ten items e.g., 'If other people knew what I am really like, they would think less of me'), and unassertive interpersonal behaviour (eight items; e.g., 'I find it hard to get angry with people').

*Ruminative Response Scale.* The 10-item Ruminative Response Scale (RRS-10; Treynor et al., 2003) is one of the most widely used self-report measures of rumination, comprising 10 items and describing the factors of brooding and reflection. Each item is rated on a 4-points Likert scale ranging from 1='never' to 4='always'. The total score ranges from 10 to 40, with higher scores indicating higher degrees of ruminative symptoms.

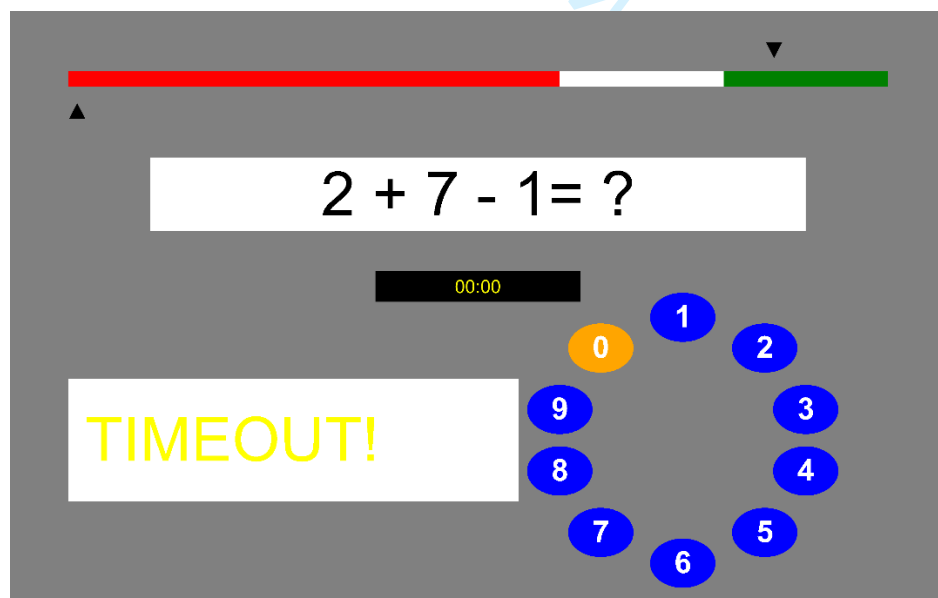

**Figure S1.** Graphical user interface of the MIST. From top to bottom, the figure shows the performance indicators (top arrow=average performance, bottom arrow=individual subject's performance), the mental arithmetic task, the progress bar reflecting the imposed time limit, the text field for feedback, and the rotary dial for the response submission.

## Risk and ethical issues

The main risk and ethical issues associated with the protocol are: 1) Consent, 2) Confidentiality, 3) Risks and costs of participation, and 4) Compensation for participation.

### **Consent**

Our participants will be 16 years old or older. We will obtain informed consent for each of the phases of the study: first, we will obtain consent verbally over the telephone when participants express their interest in the study. We will go through the PIS and inclusion/exclusion criteria to ensure participants are aware of the nature of the study. Participants will have opportunities to ask questions and details regarding confidentiality, anonymity, storage and use of data, as well as right to withdraw. Only those participants who meet the inclusion criteria and are willing to participate in the study will be invited to do so. We will send them an email with the links and instructions to complete the first online ICF, a set of self-rate questionnaires, and three cognitive tasks online. On the day of the scanning we will obtain informed consent in writing before the participants start the assessments. We will ensure that consent is voluntary and that participants are fully informed by asking whether they have understood everything on the form and whether they have any questions regarding the different assessments. We will then reiterate that participation is voluntary and that they can stop the evaluations at any time. Finally, and within a month of their in-unit evaluation at Addenbrooke's Hospital, we will send them an email with the link to complete the last online ICF and a set of self-rate questionnaires.

### **Confidentiality**

Identifiable data will be linked by a unique ID number to the participant's anonymised study assessments. Participants will be carefully monitored to ensure that the procedures are followed in accordance with the UK Data Protection Act 2018. Only RAISE study team members, who are fully aware of their responsibilities to conform to the Data Protection Act 2018, will be allowed access to the personally identifiable data which will be stored in a highly secure, password encrypted database.

1  
2  
3 The transfer and storage of the participant's biological samples (venous blood) will be  
4 appropriately handled by our collaborators according to their standard operating  
5 procedures. All tissue samples will be labelled with a non-identifiable participant ID,  
6 date of birth, data of collection and sample identifier (i.e., serum), and stored in a -80°  
7 Celsius freezer at Addenbrookes Hospital. All samples will be scanned into a secure  
8 electronic database (i.e., RedCAP) to track their location and to ensure that all samples  
9 are accounted for.  
10  
11  
12  
13  
14

15  
16 All participants will be asked to provide consent to contact their parents (<18 year old  
17 participants) or general practitioner, in case the collected data suggest that the  
18 participant might require further clinical assessment or treatment.  
19  
20  
21

### 22 **Risks and costs of participation**

23  
24  
25 *Distress during the completion of the questionnaires and cognitive tasks online:* some  
26 participants may find the questionnaires (e.g., CTQ, MFQ) or the cognitive tasks (e.g.,  
27 emotion regulation task) distressing. In order to minimise this emotional burden we  
28 have made sure that both the questionnaires and cognitive tasks included in the study  
29 reiterate that the participant may withdraw at any time during the completion of the  
30 questionnaires/tasks, in which case, they will see a screen with a list of local mental  
31 health resources with activated web links. Moreover, following the completion of the  
32 Emotional Regulation Task, participants will be debriefed to inform them that the task  
33 was designed to produce an emotional response and it is completely normal and even  
34 intended that they reacted emotionally to the pictures presented.  
35  
36  
37  
38  
39  
40  
41  
42

43 *Self-injury and suicidality disclosure:* self-injury and suicidality disclosure will be  
44 addressed during the completion of the questionnaires online and at the end of the in-  
45 unit assessment. The completion of the questionnaires is configured in such a way that  
46 the RAISE study research team will receive an immediate email if the participant  
47 discloses current self-injury or suicidality (i.e., affirmative answer on Q19 of the MFQ  
48 and/or Qs11-12, or Qs14-15 of the DASI). The principal investigator and/or a suitable  
49 member of the research team will then review the participant's questionnaires with the  
50 psychiatrists affiliated with the study and if there is concern about imminent risk of self-  
51 injury or danger to the participant (e.g. disclosed current physical, sexual, or emotional  
52 abuse), they will call the participant. This will also be an opportunity to gather further  
53  
54  
55  
56  
57  
58  
59  
60

1  
2  
3 details (particularly regarding suicidal thoughts) and clarify whether they are in need of,  
4 and seeking, the appropriate help. If the risk is imminent, we will suggest the participant  
5 call First Response Service (111) or attend E&A. If the risk is not imminent and the  
6 participant is 18+ we will suggest they talk to their GP. If the participant is 16-17, we  
7 will suggest they talk to their GP and their parents/the people they live with about how  
8 they are feeling. If the participant refuses to seek help, we have a duty to care and it will  
9 be necessary to breach confidentiality. If the participant is 18+ we will contact their GP.  
10 If the participant is 16-17 we will contact their parents/guardians first. If contacting  
11 parents/guardians is contraindicated because of poor guardians-participant relationships  
12 (e.g., when disclosing to a parent may increase risk of suicide), direct contact with the  
13 participant's GP, or other local clinic or clinical support will be sought. Important points  
14 to note during disclosure to parents/guardians include: explaining that the study  
15 measures are not clinical instruments and thus cannot be used to detect future risk with  
16 absolute certainty, expressing concern about their child's responses to specific items,  
17 reinforcing that the safety of their child is of primary importance, helping them to think  
18 about how to get a psychological evaluation of their child and encouraging them to do  
19 so, reminding them that any information shared by their child was difficult for them to  
20 disclose, and recommending non-punitive and sensitive behaviour towards their child  
21 with regard to the issue. In the in-unit assessment, in addition to having lunch and time  
22 to relax, we will have a distress protocol in place in case the participant reports severe  
23 distress during or after the assessments.

24  
25  
26  
27  
28  
29  
30  
31  
32  
33  
34  
35  
36  
37  
38  
39  
40  
41 *Risks associated with the venepuncture:* to minimise discomfort, blood taking will be  
42 conducted by a clinical research nurse, according to the standard Clinical Research  
43 Facilities operating procedures and risk protocols. The participant will have time to rest  
44 after the procedure.

45  
46  
47  
48 Distress and discomfort during brain scanning: the MIST task is intended to be stressful.  
49 Therefore, after the session, we will debrief our participants by explaining to them that  
50 the task was designed to be impossible to accomplish and that it did not assess their true  
51 ability to perform mental arithmetic. Moreover, MRI scanners are very loud. In order to  
52 reduce any potential discomfort, all participants will be given earplugs for aural  
53 protection. MRI scanning also requires participants to lie still in the scanner which some  
54 may find uncomfortable or may induce feelings of claustrophobia. We will ensure that  
55  
56  
57  
58  
59  
60

1  
2  
3 participants are as comfortable as possible by providing neck and arm pillows.  
4  
5 Furthermore, we will make sure that participants can communicate with a member of  
6  
7 the research team at any time during scanning. They will be informed that if they would  
8  
9 like to stop they may do so by pressing a button which will be easily accessible to them  
10  
11 at all times.

12  
13 *Potential clinical findings:* we will obtain consent from participants to inform their GP  
14  
15 if any clinically relevant information comes to light during their participation in the  
16  
17 study. In all cases, we will discuss it with a specialist and contact the participant first. If  
18  
19 the participant refuses to seek help, we have a duty to care and it will be necessary to  
20  
21 breach confidentiality. For neuroimaging findings, the Wolfe Brain Imaging Center  
22  
23 (where the acquisition of the images will take place) policy is that all studies will  
24  
25 include at least T1 and T2 weighted datasets, that are internally reported by a clinically  
26  
27 qualified reviewer, who will refer to the WBIC clinical lead. The clinical lead will  
28  
29 counsel the individual regarding further clinical referrals (including potential GP  
30  
31 referral).

32  
33 *Time burden:* the online assessments are not expected to last more than 2 and 1 hours  
34  
35 respectively. During the in-unit assessment each participant will be tested for no longer  
36  
37 than 5 hours in total. These durations will be clearly communicated to the participants at  
38  
39 the beginning of the study.

### 40 **Compensation for participation**

41  
42 To compensate for their time, participants will be paid £150. In addition, breakfast and  
43  
44 lunch will be provided on the in-unit assessment day.  
45  
46  
47  
48  
49  
50  
51  
52  
53  
54  
55  
56  
57  
58  
59  
60



## References

Angold A, Costello EJ, Messer SC, Pickles A. Development of a short questionnaire for use in epidemiological studies of depression in children and adolescents. *International Journal of Methods in Psychiatric Research*. 1995;5(4):237–49.

Bamber D, Tamplin A, Park RJ, Kyte ZA, Goodyer IM. Development of a Short Leyton Obsessional Inventory for children and adolescents. *Journal of the American Academy of Child & Adolescent Psychiatry*. 2002;41(10):1246–52.

Bernstein DP, Fink L, Handelsman L, Foote J, Lovejoy M, Wenzel K, et al. Initial reliability and validity of a new retrospective measure of child abuse and neglect. *The American Journal of Psychiatry*. 1994;151(8):1132–6.

Cassels M, van Harmelen A, Neufeld S, Goodyer I, Jones PB, Wilkinson P. Poor family functioning mediates the link between childhood adversity and adolescent nonsuicidal self-injury. *Journal of Child Psychology and Psychiatry, and allied disciplines*. 2018;59(8):881–7.

Cleghorn CL, Harrison RA, Ransley JK, Wilkinson S, Thomas J, Cade JE. Can a dietary quality score derived from a short-form FFQ assess dietary quality in UK adult population surveys? *Public Health Nutrition*. 2016;19(16):2915–23.

Cohen S, Kamarck T, Mermelstein R. A Global Measure of Perceived Stress. *Journal of Health and Social Behavior*. 1983;24(4):385–96.

Daviss WB, Birmaher B, Melhem NA, Axelson DA, Michaels SM, Brent DA. Criterion validity of the Mood and Feelings Questionnaire for depressive episodes in clinic and non-clinic subjects. *Journal of Child Psychology and Psychiatry*. 2006;47(9):927–34.

Dedovic K, Renwick R, Mahani NK, Engert V, Lupien SJ, Pruessner JC. The Montreal Imaging Stress Task: using functional imaging to investigate the effects of perceiving and processing psychosocial stress in the human brain. *The Journal of Psychiatry & Neuroscience*. 2005;30(5):319–25.

Ekman P, Friesen WV. *Pictures of Facial Affect*. Palo Alto, CA: Consulting Psychologists Press, 1976.



1  
2  
3 Elgar FJ, Waschbusch DA, Dadds MR, Sigvaldason N. Development and validation of  
4 a short form of the Alabama Parenting Questionnaire. *Journal of Child and Family*  
5 *Studies*. 2007;16(2):243–59.  
6  
7

8  
9 Epstein NB, Baldwin LM, Bishop DS. The McMaster Family Assessment Device.  
10 *Journal of Marital and Family Therapy*. 1983;9(2):171–80.  
11  
12

13  
14 Goodyer IM, Herbert J, Tamplin A, Secher SM, Pearson J. Short-term outcome of  
15 major depression: II. Life events, family dysfunction, and friendship difficulties as  
16 predictors of persistent disorder. *Journal of the American Academy of Child &*  
17 *Adolescent Psychiatry*. 1997;36(4):474–80.  
18  
19

20  
21 Harb GC, Heimberg RG, Fresco DM, Schneier FR, Liebowitz MR. The psychometric  
22 properties of the Interpersonal Sensitivity Measure in social anxiety disorder. *Behaviour*  
23 *Research and Therapy*. 2002;40(8):961–79.  
24  
25

26  
27 Kanske P, Heissler J, Schönfelder S, Bongers A, Wessa M. How to regulate emotion?  
28 Neural networks for reappraisal and distraction. *Cerebral Cortex*. 2011;21(6):1379–88.  
29  
30

31  
32 Kessler RC, Andrews G, Colpe LJ, Hiripi E, Mroczek DK, Normand S-LT, et al. Short  
33 screening scales to monitor population prevalences and trends in non-specific  
34 psychological distress. *Psychological Medicine*. 2002;32(6):959–76.  
35  
36

37  
38 Miller IW, Epstein NB, Bishop DS, Keitner GI. The McMaster Family Assessment  
39 Device: reliability and validity. *Journal of Marital and Family Therapy*.  
40 1985;11(4):345–56.  
41  
42

43  
44 Oldfield RC. The assessment and analysis of handedness: The Edinburgh inventory.  
45 *Neuropsychologia*. 1971;9(1):97–113.  
46  
47

48  
49 Parker G, Roussos J, Hadzi-Pavlovic D, Mitchell P, Wilhelm K, Austin M-P. The  
50 development of a refined measure of dysfunctional parenting and assessment of its  
51 relevance in patients with affective disorders. *Psychological Medicine*.  
52 1997;27(5):1193–203.  
53  
54

55  
56 Petersen W. *Society and the Adolescent Self-Image*. Morris Rosenberg. Princeton  
57 University Press, Princeton, N.J., 1965.  
58  
59  
60

1  
2  
3 Preston SD, Stansfield RB. I know how you feel: Task-irrelevant facial expressions are  
4 spontaneously processed at a semantic level. *Cognitive, Affective, & Behavioral*  
5 *Neuroscience*. 2008;8(1):54–64.  
6  
7

8  
9 Reynolds CR, Richmond BO. What I think and feel: a revised measure of children's  
10 manifest anxiety. *Journal of Abnormal Child Psychology*. 1978;6(2):271–80.  
11  
12

13 Sheehan DV, Lecrubier Y, Sheehan KH, Amorim P, Janavs J, Weiller E, et al. The  
14 Mini-International Neuropsychiatric Interview (M.I.N.I.): the development and  
15 validation of a structured diagnostic psychiatric interview for DSM-IV and ICD-10. *The*  
16 *Journal of Clinical Psychiatry*. 1998;59(suppl 20):22–33.  
17  
18  
19

20  
21 Spielberger C, Gorsuch R, Lushene R, Vagg P, Jacobs G. *Manual for the State-Trait*  
22 *Anxiety Inventory*. Palo Alto, CA: Consulting Psychologists Press 1983.  
23  
24

25  
26 Tennant R, Hiller L, Fishwick R, Platt S, Joseph S, Weich S, et al. The Warwick-  
27 Edinburgh Mental Well-being Scale (WEMWBS): development and UK validation.  
28 *Health and Quality of Life Outcomes*. 2007;5(1):63.  
29  
30

31  
32 Treynor W, Gonzalez R, Nolen-Hoeksema S. Rumination reconsidered: a psychometric  
33 analysis. *Cognitive Therapy and Research*. 2003;27(3):247–59.  
34  
35

36  
37 van Harmelen A-L van, Gibson JL, Clair MCS, Owens M, Brodbeck J, Dunn V, et al.  
38 Friendships and family support reduce subsequent depressive symptoms in at-risk  
39 adolescents. *PLOS ONE*. 2016;11(5):e0153715.  
40  
41

42  
43 van Harmelen A-L, Kievit RA, Ioannidis K, Neufeld S, Jones PB, Bullmore E, et al.  
44 Adolescent friendships predict later resilient functioning across psychosocial domains in  
45 a healthy community cohort. *Psychological Medicine*. 2017;47(13):2312–22.  
46  
47

48  
49 Wechsler, D. (1999). *Wechsler Abbreviated Scale of Intelligence*. San Antonio, TX:  
50 The Psychological Corporation.  
51

52  
53 Wood A, Kroll L, Moore A, Harrington R. Properties of the Mood and Feelings  
54 Questionnaire in adolescent psychiatric outpatients: a research note. *Journal of Child*  
55 *Psychology and Psychiatry*. 1995;36(2):327–34.  
56  
57  
58  
59  
60

# BMJ Open

## The RAISE study protocol; a cross-sectional, multi-level, neurobiological study of studying resilience after individual stress exposure

|                                 |                                                                                                                                                                                                                                                                                                                                                                                                                                                                                                                                                                                                                                                                                                                                                                                                                                                                                                                  |
|---------------------------------|------------------------------------------------------------------------------------------------------------------------------------------------------------------------------------------------------------------------------------------------------------------------------------------------------------------------------------------------------------------------------------------------------------------------------------------------------------------------------------------------------------------------------------------------------------------------------------------------------------------------------------------------------------------------------------------------------------------------------------------------------------------------------------------------------------------------------------------------------------------------------------------------------------------|
| Journal:                        | <i>BMJ Open</i>                                                                                                                                                                                                                                                                                                                                                                                                                                                                                                                                                                                                                                                                                                                                                                                                                                                                                                  |
| Manuscript ID                   | bmjopen-2020-040394.R1                                                                                                                                                                                                                                                                                                                                                                                                                                                                                                                                                                                                                                                                                                                                                                                                                                                                                           |
| Article Type:                   | Protocol                                                                                                                                                                                                                                                                                                                                                                                                                                                                                                                                                                                                                                                                                                                                                                                                                                                                                                         |
| Date Submitted by the Author:   | 23-Nov-2020                                                                                                                                                                                                                                                                                                                                                                                                                                                                                                                                                                                                                                                                                                                                                                                                                                                                                                      |
| Complete List of Authors:       | Moreno-López, Laura; University of Cambridge School of Clinical Medicine, Department of Psychiatry<br>Sallie, Samantha; University of Cambridge School of Clinical Medicine, Department of Psychiatry<br>Ioannidis, Konstantinos; University of Cambridge School of Clinical Medicine, Department of Psychiatry; Cambridgeshire and Peterborough NHS Foundation Trust<br>Kaser, Muzaffer; University of Cambridge School of Clinical Medicine, Department of Psychiatry; Cambridgeshire and Peterborough NHS Foundation Trust<br>Schueler, Katja; Johannes Gutenberg Universitat Mainz, Department for Clinical and Neuropsychology<br>Askelund, Adrian; University of Oslo, Department of Psychology<br>Turner, Lorinda; University of Cambridge School of Clinical Medicine, Department of Medicine<br>van Harmelen, Anne-Laura; University of Cambridge School of Clinical Medicine, Department of Psychiatry |
| <b>Primary Subject Heading</b>: | Mental health                                                                                                                                                                                                                                                                                                                                                                                                                                                                                                                                                                                                                                                                                                                                                                                                                                                                                                    |
| Secondary Subject Heading:      | Mental health                                                                                                                                                                                                                                                                                                                                                                                                                                                                                                                                                                                                                                                                                                                                                                                                                                                                                                    |
| Keywords:                       | Child & adolescent psychiatry < PSYCHIATRY, IMMUNOLOGY, Magnetic resonance imaging < RADIOLOGY & IMAGING                                                                                                                                                                                                                                                                                                                                                                                                                                                                                                                                                                                                                                                                                                                                                                                                         |
|                                 |                                                                                                                                                                                                                                                                                                                                                                                                                                                                                                                                                                                                                                                                                                                                                                                                                                                                                                                  |

SCHOLARONE™  
Manuscripts



I, the Submitting Author has the right to grant and does grant on behalf of all authors of the Work (as defined in the below author licence), an exclusive licence and/or a non-exclusive licence for contributions from authors who are: i) UK Crown employees; ii) where BMJ has agreed a CC-BY licence shall apply, and/or iii) in accordance with the terms applicable for US Federal Government officers or employees acting as part of their official duties; on a worldwide, perpetual, irrevocable, royalty-free basis to BMJ Publishing Group Ltd ("BMJ") its licensees and where the relevant Journal is co-owned by BMJ to the co-owners of the Journal, to publish the Work in this journal and any other BMJ products and to exploit all rights, as set out in our [licence](#).

The Submitting Author accepts and understands that any supply made under these terms is made by BMJ to the Submitting Author unless you are acting as an employee on behalf of your employer or a postgraduate student of an affiliated institution which is paying any applicable article publishing charge ("APC") for Open Access articles. Where the Submitting Author wishes to make the Work available on an Open Access basis (and intends to pay the relevant APC), the terms of reuse of such Open Access shall be governed by a Creative Commons licence – details of these licences and which [Creative Commons](#) licence will apply to this Work are set out in our licence referred to above.

Other than as permitted in any relevant BMJ Author's Self Archiving Policies, I confirm this Work has not been accepted for publication elsewhere, is not being considered for publication elsewhere and does not duplicate material already published. I confirm all authors consent to publication of this Work and authorise the granting of this licence.

1  
2  
3  
4  
5  
6  
7  
8 **The RAISE study protocol; a cross-sectional, multi-level, neurobiological**  
9 **study of studying resilience after individual stress exposure**  
10  
11  
12  
13

14 Laura Moreno-López<sup>1,\*</sup>, Samantha N. Sallie<sup>2</sup>, Konstantinos Ioannidis<sup>3,4</sup>, Muzaffer  
15 Kaser<sup>5,6</sup>, Katja Schueler<sup>7</sup>, Adrian Dahl Askelund<sup>8</sup>, Lorinda Turner<sup>9</sup>, RAISE Consortium,  
16 & Anne-Laura van Harmelen<sup>10,\*</sup>  
17  
18  
19

20 \* Corresponding author  
21  
22  
23

24 <sup>1</sup> Department of Psychiatry, University of Cambridge, 18b Trumpington Rd, Cambridge, CB2 8AH,  
25 UK. [lm618@medschl.cam.ac.uk](mailto:lm618@medschl.cam.ac.uk).

26 <sup>2</sup> Department of Psychiatry, University of Cambridge, UK. [sns36@cam.ac.uk](mailto:sns36@cam.ac.uk).

27 <sup>3</sup> Department of Psychiatry, University of Cambridge, UK. [konstantinos.ioannidis@cpft.nhs.uk](mailto:konstantinos.ioannidis@cpft.nhs.uk).

28 <sup>4</sup> Cambridgeshire and Peterborough NHS Foundation Trust, Fulbourn, UK. [konstantinos.ioannidis@cpft.nhs.uk](mailto:konstantinos.ioannidis@cpft.nhs.uk).

29 <sup>5</sup> Department of Psychiatry, University of Cambridge, UK. [mk708@medschl.cam.ac.uk](mailto:mk708@medschl.cam.ac.uk).

30 <sup>6</sup> Cambridgeshire and Peterborough NHS Foundation Trust, Fulbourn, UK. [mk708@medschl.cam.ac.uk](mailto:mk708@medschl.cam.ac.uk).

31 <sup>7</sup> Department for Clinical and Neuropsychology, Johannes Gutenberg University of Mainz, Germany.  
32 [kschueler@uni-mainz.de](mailto:kschueler@uni-mainz.de).

33 <sup>8</sup> Department of Psychology, University of Oslo, Norway. [adrian.askelund@gmail.com](mailto:adrian.askelund@gmail.com).

34 <sup>9</sup> Department of Medicine, University of Cambridge, UK. [lt400@medschl.cam.ac.uk](mailto:lt400@medschl.cam.ac.uk)

35 <sup>10</sup> Department of Psychiatry, University of Cambridge, 18b Trumpington Rd, Cambridge, CB2 8AH, UK.  
36 [av391@medschl.cam.ac.uk](mailto:av391@medschl.cam.ac.uk).  
37  
38  
39  
40  
41  
42  
43  
44  
45  
46  
47  
48  
49  
50  
51  
52  
53  
54  
55  
56  
57  
58  
59  
60

Abstract = 294

Wordcount = 4.582

## ABSTRACT

**Introduction:** This paper describes the protocol for an ongoing project funded by the Royal Society, the Resilience After Individual Stress Exposure (RAISE) study; which aims to examine the factors and mechanisms that facilitate resilient functioning after childhood adversity (CA). **Methods and Analysis:** We aim to recruit up to 200 participants. We will use dimension reduction techniques (PCA) on standard-normally transformed individual parameters of mental health, social functioning and CA to calculate a composite measure of adaptive (i.e., ‘resilient’) psychosocial functioning. To examine the neuro-immune responses to stress and their relationship with the brain and social environment, we will use a well validated functional magnetic resonance imaging (fMRI) task; the Montreal imaging stress task (MIST), and venepuncture. We will run group or dimensional comparisons in multiple levels of biological and psychological outcomes, as well as mediation and moderation analyses to study how key biological systems (i.e., the hypothalamic-pituitary-adrenal axis and the immune system) interrelate and interact with brain function and social influences in order to facilitate resilient functioning after CA. We hypothesize that resilient functioning will be facilitated by reduced morning cortisol and cytokine levels before and after the stressor and improved neural responses to such stress, as well as increased gray matter volume in the hippocampus and prefrontal cortex, enhanced inhibitory control and emotion regulation, and more friendship and family support. **Ethics and Dissemination:** This study has been reviewed and given favourable opinion by the National Research Ethics Service, NRES Committee East of England – Cambridge Central and external reviewers from the Royal Society (RGF\R1\180064 and RGF\EA\180029). The results of the RAISE study will be disseminated through (1) publications in scientific peer reviewed journals, (2) presentations on relevant scientific conferences and meetings, (3) publications and presentations for the general public and (4) through social media.

**Keywords:** Resilience; Stress; Childhood adversity; Maltreatment; Adolescence.

### **Strengths and limitations of this study**

The RAISE study will provide a comprehensive evaluation of the neurobiological mechanisms that contribute to adolescent resilience.

We will use standardised and validated instruments of psychological functioning, childhood adversity, cognitive tasks, venepuncture and neuroimaging.

The exclusion of psychiatric patients will restraint the data to the resilience side of the spectrum

Child adversity will be assessed from self-reports that are subjected to reporting biases.

A longer recruitment period may be required due to Covid-19.

## 1. INTRODUCTION

Childhood adversity is the leading preventable risk factor for mental illness and substance abuse [1–8]. This kind of experiences, which can happen within the family environment (e.g., in the form of childhood maltreatment and/or intra-family adversity) or outside the household (e.g., trauma and bullying), can have a detrimental impact on a wide range of functions. For example, CA has been associated with physical (e.g., failure to thrive, poor adult health, and high mortality), cognitive (e.g., impaired inhibitory control and emotion regulation), and personal and interpersonal problems (e.g., negative self-cognitions, suicidal behaviours, increased peer rejection, social withdrawal, sexual maladjustment, aggression, and criminality) [8–16].

Importantly, adolescents with CA are at increased risk for and are more sensitive to psychosocial stress. In response to acute stress, the body reacts by releasing pro-inflammatory cytokines, such as interleukin-6 (IL-6) and tumor necrosis factor alpha (TNF- $\alpha$ ) [17]. These cytokines play a key role in stress reactivity and stress recovery [18]. Specifically, pro-inflammatory cytokines stimulate the hypothalamic-pituitary-adrenal (HPA) axis to release glucocorticoid hormones such as cortisol.

Glucocorticoids, in turn, suppress the further release of cytokines from the immune system [19]. Thus, cortisol is an important anti-inflammatory compound in the body that is crucial for stress recovery. Pro-inflammatory cytokines and chemokines can cross the blood-brain barrier and negatively impact the function of brain regions involved in threat, reward, and executive functioning [20,21]. Indeed, acute stress has been associated with increased levels of pro-inflammatory cytokines in the amygdala and decreased pro-inflammatory cytokines in the medial prefrontal cortex (MPFC) [22]; regions associated with executive functions and emotion regulation [23–28]. Therefore, it is plausible that the alteration of these processes, or the inability to properly value and manage emotions, can lead to anxiety and/or depression in situations of negative affect [29–31].

However, although CA is associated with considerably lowered odds of adequate mental and physical health functioning later in life, a significant proportion of individuals with a history of CA function ‘better than expected,’ or, in other words, are “functioning resiliently” [32]. These individuals may have benefited from protective ‘resilience factors’ [33,34] which exist across social, cognitive, neuronal, physiological



1  
2  
3 and genetic levels. For example, good mental health after CA has been associated with  
4 increased hippocampal volume and greater connectivity between the central executive  
5 network and limbic regions as well as a greater ability to regulate emotions [35], higher  
6 self-esteem [36,37] and social support [32,38].  
7  
8  
9

## 10 **2. OBJECTIVES AND HYPOTHESIS**

11  
12  
13 Resilient functioning has been associated with various components, ranging from genes  
14 and cellular mechanisms to higher-order biological systems and the social environment  
15 (see reviews in [39–41]; Figure 1). However, it is yet unknown whether and how neuro-  
16 immune responses to psychosocial stress differ in resilient vs. vulnerable adolescents  
17 with a history of CA. In this study, we aim to test the factors and mechanisms that  
18 facilitate resilient functioning, the interactions between those factors, and how they  
19 explain resilient responses to future stress. Specifically, we will address resilience by  
20 investigating how key biological systems (i.e., the HPA axis and the immune system)  
21 interrelate and interact with brain structure, brain function, and social influences to  
22 facilitate resilient functioning after CA.  
23  
24  
25  
26  
27  
28  
29  
30

31 All included participants will complete an online assessment to assess psychological  
32 functioning and early life experiences, an in-unit assessment day to assess neuro-  
33 immune and cognitive responses to stress, and an online follow-up assessment to assess  
34 psychological functioning after stress exposure. Resilient functioning will be quantified  
35 as the degree to which an individual functions better or worse than expected given their  
36 self-reported childhood adversity experiences ([32,39]; Figure 2). Specifically, to  
37 examine the neuro-immune responses to stress and their relationship with brain  
38 structure and function and the social environment, we will use a well-validated  
39 functional magnetic resonance imaging (fMRI) task, The Montreal imaging stress task  
40 (MIST), and venepuncture. Since stress increases circulating inflammatory protein  
41 levels in the blood, and high levels of inflammation predict later mental health  
42 disorders, we will examine whether resilience is related to lower levels of inflammation  
43 in response to psychosocial stress, and whether this is explained by improved brain  
44 responses to stress.  
45  
46  
47  
48  
49  
50  
51  
52  
53  
54  
55

56 We hypothesise that resilient functioning will be facilitated by:

- 57  
58  
59 1) Reduced morning cortisol and cytokine levels before and after the stressor (i.e., a  
60

1  
2  
3 latent factor constructed by serum high-sensitivity c-reactive protein (hs-CRP),  
4 TNF- $\alpha$ , IL-6 and Interleukin-1 factor beta (IL1 $\beta$ ) levels, as these have been shown  
5 to be increased in those with CA and mental illness (i.e., [42–46]).  
6  
7

- 8  
9  
10  
11  
12 2) Reduced stress-related brain responses (i.e., amygdala, insula) and increased  
13 modulatory responses in the MPFC and anterior cingulate cortex (ACC) [47–49]  
14 during the MIST.  
15  
16 3) Increased functional connectivity between the DMPFC and emotion processing  
17 regions (e.g., insula, amygdala and hippocampus) during the MIST [50].  
18  
19 4) Increased gray matter volume in the hippocampus and prefrontal cortex [35,51–57].  
20  
21 5) Enhanced cognitive and emotional executive performance in behavioural tasks of  
22 inhibitory control and emotion regulation [29].  
23  
24 6) Higher self-esteem and more friendship and family support which will aid lower  
25 anxiety and perceived stress after the MIST [36,58].  
26  
27 7) Finally, we expect that the neurocognitive mechanisms that facilitate resilient  
28 functioning to stress at in-unit assessment will be related to improved cognitive and  
29 emotional functioning at follow-up (lower rumination, lower interpersonal stress,  
30 improved mood) in line with the neuro-immune network hypothesis ([21]; Figure  
31 3).  
32  
33  
34  
35

### 36 3. METHODS

#### 37 3.1. Recruitment and eligibility

38  
39  
40  
41 Recent research suggests that the link between CA and immune markers in the blood  
42 are small for hsCRP immune biomarkers in adults with depression (hsCRP  $r=0.15$ ,  
43 [59]). However, there are no studies investigating immune biomarkers in response to  
44 stress in adolescents. Therefore, it is difficult to determine the necessary sample size for  
45 our study. For instance, sample sizes for an intended power of 80% are  $r=0.15$ :  $n=345$ ;  
46  $r=0.2$ :  $n=193$ ;  $r=0.3$ :  $n=84$ . Furthermore, it is well-established that sample correlations  
47 show fluctuations and are unstable in smaller samples. Simulation studies show that for  
48 a stable (i.e., replicable and generalizable) correlation, any sample would need to  
49 approach  $N=250$  individuals [60]. For this reason, to increase power to find small  
50 effects, we will recruit  $N=200$  participants. With this sample size, our study is  
51 appropriately powered to detect correlations from  $r>0.19$ .  
52  
53  
54  
55  
56  
57  
58  
59  
60

1  
2  
3 Participants will be recruited from the general population and from previous studies  
4 conducted in the Department of Psychiatry of the University of Cambridge. First, we  
5 will contact participants from the Neuroscience in Psychiatry Network (NSPN) study  
6 who agreed to be contacted again. NSPN is a multi-centre accelerated longitudinal  
7 community cohort study (N=2389) focusing on normative adolescent to young adult  
8 development (between the ages of 14 and 24). Overall, this sample can be described as  
9 healthy, reporting low levels of psychopathological symptoms, behaviours and/or  
10 personality traits, and average mental wellbeing scores. From this cohort, we will  
11 contact those who agreed to be contacted for future research of whom family adversity  
12 scores were in the highest 25% of the entire NSPN cohort ( $\geq 75\%$ =597 eligible  
13 individuals) as assessed by van Harmelen et al., 2017 [32]. Family adversity scores in  
14 NSPN were calculated using a Principal Component Analysis (PCA) on standard-  
15 normally transformed sum scores for the Measure of Parenting Style (MOPS) and the  
16 Alabama Parenting Questionnaire (APQ). Eligible participants will be contacted via  
17 email first. This email will include the participant information sheet (PIS) of the study.  
18 A reminder email will be sent after a month. Finally, we will contact those participants  
19 who cannot be reached by email via phone call. To recruit participants from the general  
20 population we will distribute flyers and advertisements in colleges, Addenbrooke's  
21 hospital, and online. Individuals expressing an interest in the study could either email or  
22 telephone a member of the research team and leave their contact details. A member of  
23 the RAISE study research team will then phone interested individuals. During the  
24 telephone call a member of the research team will discuss the content of the PIS and  
25 assess the inclusion and exclusion criteria in order to ensure they are eligible and fully  
26 aware of the nature of the study. Eligible participants will be emailed the PIS of the  
27 study. Potential participants will be given the opportunity to raise any queries regarding  
28 any aspect of the study including confidentiality, anonymity, storage and use of data, as  
29 well as the right to withdraw.

30  
31  
32  
33  
34  
35  
36  
37  
38  
39  
40  
41  
42  
43  
44  
45  
46  
47  
48  
49  
50  
51 The inclusion criteria will be: aged 16-26 years old; able and willing to give informed  
52 consent; able to speak, write, and understand English; BMI between 18.5 and 29.9  
53 kg/m<sup>2</sup>; have experienced adverse life experiences and/or CA within the family  
54 environment including childhood maltreatment (e.g., emotional, sexual and/or physical  
55 abuse, emotional and/or physical neglect) and intra-family adversity (e.g., marital  
56 distress/conflict, parental mental health problems and/or parental alcohol dependence,  
57  
58  
59  
60

1  
2  
3 violence and/or aggressive behaviour) before the age of 16; and willing to abstain from  
4 strenuous exercise for 72 hours prior to the in-unit assessment.  
5  
6

7  
8 The exclusion criteria will be: alcohol or substance use disorder within the past 6  
9 months; current disorders likely to compromise the interpretation of the data (including,  
10 but not limited to, psychiatric disorders, immunological disorders, cardiovascular  
11 disorders, endocrine and autoimmune disorders, malignancies or infections, or any other  
12 condition to be determined by the principal investigator or delegate); current medication  
13 likely to compromise the interpretation of immunological data (including, but not  
14 limited to, corticosteroids or any other substance to be determined by the principal  
15 investigator or delegate); and contraindications to MRI (e.g., pacemaker or other  
16 implantable device or pregnancy).  
17  
18  
19  
20  
21  
22

### 23 24 3.2. Testing protocol and procedure 25

26  
27 All included participants will be asked to complete 3 phases:  
28

29  
30 Phase I: an online assessment to assess psychological functioning and early life  
31 experiences; phase II: an in-unit assessment to assess neuro-immune and cognitive  
32 responses to stress, and phase III: an online follow-up assessment to assess  
33 psychological functioning after stress exposure. Please see Figure 4 and sections below  
34 for a description of the measures included in each phase.  
35  
36  
37  
38

#### 39 Phase I: online assessment 40

41  
42 The online assessment will include signing an informed consent form (ICF), the  
43 completion of a set of self-report questionnaires and two cognitive tasks online. The  
44 self-report questionnaires included in this assessment will be the Mood and Feelings  
45 Questionnaire (MFQ; [61]), Revised Children's Manifest Anxiety Scale (RCMAS;  
46 [62]), Leyton Obsessional Inventory (LOI; [63]), the 10-item version of the Kessler  
47 Psychological Distress Scale (K10; [64]), the Child Behaviours Checklist (CBC; [65]),  
48 the Warwick-Edinburgh Mental Well-being Scale (WEMWBS; [66]), the Measure of  
49 Parenting Style (MOPS; [67]), the Alabama Parenting Questionnaire (APQ; [68]), the  
50 Cambridge Friendship Questionnaire (CFQ), Family Assessment Device (FAD;  
51 [69,70]), Rosenberg Self-Esteem Scale (RSES; [71]), Childhood Trauma Questionnaire  
52 (CTQ; [72]) and the Drugs, Alcohol, and Self-Injury Inventory (DASI; [73]). These  
53  
54  
55  
56  
57  
58  
59  
60

1  
2  
3 questionnaires will be used to calculate a composite measure of resilient functioning as  
4 described below. The cognitive tasks will be the Emotional Stroop task [74] and  
5 Emotional Regulation task [75]. More information about these measures is provided in  
6 the Supplementary Material.  
7  
8  
9

## 10 Phase II: in-unit assessment

11  
12  
13 Following completion of the online assessment, participants will be contacted to  
14 schedule an appointment at Addenbrooke's Hospital (Cambridge, UK), after which they  
15 will receive a letter with the appointment details. This letter will include clothing and  
16 make-up regulations for brain scanning, time and location of the facilities where the  
17 evaluations will take place, as well as the research team's contact details. It will also  
18 reiterate that participation is voluntary and that participants can withdraw at any given  
19 time during the study. The second assessment will have a duration of 5 hours and will  
20 include (1) the completion of a second ICF, (2) a clinical evaluation, (3) a research  
21 nurse protocol, (4) an MRI session, and (5) the completion of a second set of self-report  
22 questionnaires. Please see the sections below for a description of the instruments  
23 included in each assessment.  
24  
25  
26  
27  
28  
29  
30  
31  
32

## 33 **Clinical evaluation**

34  
35  
36 Participants will be asked to attend the clinical research facility (CRF) at  
37 Addenbrooke's Hospital at 9am, where they will be given a detailed overview of the  
38 study, asked to sign the ICF, and receive a low-fat breakfast adapted to their nutritional  
39 needs. The breakfast provided will exclude antioxidants such as glutathione and  
40 vitamins E and C to reduce the effects of these variables on the inflammatory markers  
41 addressed [76]. Subsequently, the clinical evaluation will take place. This session will  
42 include the evaluation of psychiatric disorders, handedness, physical activity, sleep and  
43 eating patterns, medications (e.g., oral contraception), and intellectual functioning.  
44 Specifically, we will use the following measures: The Mini-International  
45 Neuropsychiatric Interview (MINI; [77]), The Edinburgh handedness inventory [78],  
46 The Short-form Frequency Food questionnaire (SFFFQ; [79]) and The Wechsler  
47 Abbreviated Scale of Intelligence (WASI; [80]). The measures used will be  
48 supplemented with an interview. See the Supplementary Material for a description of  
49 the instruments used in this evaluation.  
50  
51  
52  
53  
54  
55  
56  
57  
58  
59  
60

## Physiological evaluation protocol

The clinical assessment will be followed by a physiological evaluation protocol. A research nurse will assess physical variables such as body temperature, height, weight, waist circumference, blood pressure (systolic and diastolic), and will implant a cannula to take blood samples during the assessment day.

### *Venepuncture*

The implantation of the cannula will be conducted according to the standard Cambridge Clinical Research Facility protocol with risk protocols in place. These procedures include a brief interview about adverse experiences with blood assessment (such as fainting), as well as their preference for one arm or the other and if they want to lie down, or sit upright during the implantation of the cannula. Up to 30 mL of venous blood will be collected per participant for the measurement of cortisol, blood cytokines and immunophenotyping (i.e., basic immune cell counts and cell phenotyping). Blood will be extracted using an intravenous catheter inserted in the antecubital vein of the arm of the participants. 30 minutes following catheter insertion, the participants will undergo MRI scanning and will perform the psychological stress task (i.e., MIST). 1.2 mL K2 EDTA tubes will be taken for the analysis of immunophenotyping, 2.6 mL serum white tap tubes for the analysis of cytokines and 4.6 mL serum brown tap tubes for the analysis of cortisol. Bloods will be acquired at 4 time points: (-T1) 45 min before the start of the task (baseline line), (T0) right before the start of the task, (T30) right after the end of the task (peak cortisol) (T80) 80 min after the start of the task (delayed immune reactions) [81]. Please see Figure 5 for a representation of the venepuncture protocol.

### Neuroimaging protocol

Before the scan, participants will complete an MRI screening form, the State-Trait Anxiety Inventory [82], and practice the MIST. Each participant will be in the MRI scanner for about 50 minutes. The MRI scanning session will comprise the following MRI sequences:

*T1-weighted three-dimensional magnetisation-prepared rapid gradient-echo (MPRAGE)* (6 mins). High spatial resolution T1-weighted structural scans will be used

1  
2  
3 to aid normalisation and visualisation of each of the other MRI modalities (as described  
4 below) and analyse brain structure (i.e., cortical thickness, grey matter volume).

5  
6  
7 *Resting state functional MRI (7 mins)*. A resting state fMRI will be used to investigate  
8 effects of inflammation on brain functional connectivity.

9  
10  
11  
12 *Montreal Imaging Stress Task (30 mins)*. We will use a modified version of the  
13 Montreal imaging stress task (MIST; [83]). This task comprises a series of  
14 computerized mental arithmetic tasks with an induced failure component. The protocol  
15 consists of a training session conducted outside the imaging unit, and a test session  
16 during which the functional images are acquired. Please see the Supplementary Material  
17 for a description of the paradigm.

18  
19  
20  
21  
22  
23 After the MRI session, participants will be debriefed. We will tell them that the task was  
24 designed to be impossible to accomplish and that it did not truly assess their ability to  
25 perform mental arithmetic. Then, we will ask them to complete the STAI-State, MFQ,  
26 Life Events Questionnaire [84], and any questionnaire from the online assessment that  
27 is incomplete. After completion of the post-MRI session, the participants will have a  
28 standard meal and be given time to relax. In addition, we will have a protocol for  
29 debriefing, an information letter with relevant types of support available, and a distress  
30 protocol in case the participant reports severe distress.

### 31 32 33 34 35 36 37 38 Phase III: follow-up online assessment

39  
40  
41 The follow-up and final assessment will be completed online within a month from the  
42 in-unit assessment and will include the third and last online ICF, the MFQ, RCMAS,  
43 and LEQ, as well as the following measures described in the Supplementary Material:  
44 Perceived Stress Scale (PSS; [85]), Interpersonal Sensitivity Measure (IPSM; [86]) and  
45 the 10-item Ruminative Response Scale (RRS-10; [87]).

46  
47  
48 Please see the Supplementary Material for a relation of the main risk and ethical issues  
49 associated with this protocol.

### 50 51 52 53 54 3.3. Patient and Public Involvement

55  
56  
57 A group of 3 adolescents participated in a Lived Experience Advisory group to assess  
58 the protocol and materials included in the study (e.g. Participant Information Sheet,  
59  
60



consent forms, questionnaires etc.). We have made the following changes as a result of their feedback: (1) we have included a risk protocol in case a participant feel distressed during the completion of the questionnaires, (2) we have increased the payment for the completion of the study to account for the time burden of the questionnaires and the distress associated with the cannulation, and (3) we have modified the participant information sheet in accordance with their suggestions.

#### 4. ANALYSES

Clinical, questionnaire, and immunological data will be descriptively summarised. The significance threshold will be set at  $p < 0.05$  and Family-Wise Error (FWE) corrections will be applied to correct for multiple comparisons.

##### 4.1. Preprocessing

###### *Quantification of resilient functioning*

Using the data collected during the first online assessment, we will calculate gender and age-related degree of resilient functioning based on the model described in van Harmelen et al. [32]; see also Ioannidis et al. [39] for a description of the benefits and pitfalls of this method. Specifically, we will conduct two PCAs; one for psychosocial functioning using standard-normally transformed individual total scores on the MFQ, RCMAS, LOI, CBC, K10 and WEMWBS; and another one for CA, including standard-normally transformed sum scores for the MOPS, APQ, FAD and CTQ. From both analyses, we will extract individual scores for the first component to reflect individual current psychosocial functioning and recalled CA experience scores. Next, we will regress the psychosocial functioning component score against the CA score, testing for possible linear, quadratic or cubic relationships. From this model, we will extract the residual scores as a measure of individual degree of resilient functioning: the extent to which an individual has better, or worse, psychosocial functioning than the average score expected given their CA experiences. For parsimony, we will refer to this as degree of 'resilient functioning' with higher scores reflecting better (conditional) psychosocial functioning outcomes. These individual resilient functioning scores will be utilised in the analyses described below.



### *Imaging preprocessing*

Task-evoked and resting state fMRI data will be preprocessed using Statistical Parametric Mapping 12 (SPM12) (<http://www.fil.ion.ucl.ac.uk/spm/software/spm12/>) and the CONN toolbox (<https://web.conn-toolbox.org/>) implemented in MatLab R2019b (Mathworks, Natick, MA, USA). Images will be corrected for movement artefacts, coregistered with the T1-weighted images, normalised to a standard EPI template in the Montreal Neurological Institute (MNI) space and spatially smoothed with an 8 mm FWHM Gaussian kernel. Quality control will be performed after each pre-processing step. Structural MRI will be analysed using the FreeSurfer image analysis suite, which is widely documented and freely available online (<http://surfer.nmr.mgh.harvard.edu/>).

### *Cortisol and immune markers preprocessing*

Blood samples will be processed at the Core Biochemical Assay Laboratory (CBAL) (blood cytokines), Pathology (cortisol), and Immunology laboratory (immunophenotyping) at Addenbrookes Hospital (Cambridge, UK). 1ml of blood will be diluted 1:1 with Phosphate Buffered Saline (PBS) and stimulated with lipopolysaccharide (LPS) (LPS challenge) to analyse the production of IL-6 and other cytokines difficult to detect [88,89]. LPS-stimulated IL-6 and IL-1 $\beta$  production in peripheral leukocytes will be processed following a protocol originally developed by DeRijk et al. [90]. All cytokines, including serum TNF- $\alpha$  and hs-CRP will be measured using the MSD platform.

### *Phenotyping*

50-100 ul of blood will be used for the enumeration of the major populations of immune cells (monocytes, granulocytes, NK cells, NKT cells, CD4+ and CD8+ T cells, and B cells). We will use multi-colour flow cytometry to count and analyse the size, shape, and properties of individual cells within heterogeneous populations. We will use multivariate methods (partial least squares and PCA) to reduce dimensionality and define populations of differentially co-expressed cell counts and the unbiased gating algorithm SPADE (Spanning-tree Progression Analysis of Density-normalized Events). SPADE generates an immune cell hierarchy by clustering phenotypically similar cells into groups which can be enumerated.

## 4.2. Statistical analyses

Age, gender, socioeconomic status, and education level will be included as covariates in all analyses. Additionally, for the imaging analysis we will include the total volume of grey matter (for the analyses of grey matter), a high-pass filter uses to remove low-frequency drifts in the data (for the analysis of fMRI data), and the signal fluctuations in white matter and cerebrospinal fluid and the subject-specific 6 realignment parameters and their first order derivatives (for the analyses of functional connectivity). Finally, phase of menstrual cycle, BMI, and tobacco smoking will be used in the analyses involving immune/cortisol markers.

Hypothesis 1: Individuals with higher resilient functioning will display lower baseline cortisol and blood cytokines, faster habituation, and less cortisol volatility:

We will use a PCA to derive a factor score for endocrine or inflammatory markers at the different time points. We expect there will be two components: one relating to baseline cortisol (or index of immune biomarkers), and one relating to cortisol *change* (or index of immune responsivity; see [91] for a similar approach). We will then utilise area under curve (AUC) analyses to examine whether degree of resilient functioning is more strongly associated with general immune status (i.e., the baseline cortisol measure) or cortisol responsivity (i.e., area under the curve with respect to ground ( $AUC_G$ ) and area under the curve with respect to increase ( $AUC_I$ ) (see [92] for specifics). We will validate this result using a simple multivariate regression to examine whether the two components of immune functioning independently predict resilient functioning outcomes.

Hypotheses 2-4: Higher resilient functioning is associated with more balanced and integrated neural systems:

For the event-related fMRI analysis, we will use both whole-brain and regions of interest (ROIs) approaches. To examine the effect of stress, we will examine brain responses to the contrast 'experimental + control condition' vs. 'rest condition'. Then, in a second level analysis, we will conduct a multiple regression analysis with resilience scores as regressor of interest. The ROIs use will be the MPFC, ACC, amygdala, insula, and hippocampus. Finally, we will run a psychophysiological interaction (PPI) analysis to test hypothesis 3 (i.e., increased functional connectivity between the DMPFC and

1  
2  
3 emotion processing regions during the MIST).

4  
5  
6 For the analysis of resting state fMRI, we will use whole-brain and ROIs approaches.  
7 Our first approach will be a data-driven analysis. We will use intrinsic connectivity  
8 contrast (ICC; [93]). The use of ICC does not require a priori selection of a seed region  
9 but instead objectively defines how well each voxel is connected to the rest of the brain.  
10 Following the calculation of a resting state ICC map for each participant, we will test  
11 associations between ICC maps and resilient functioning. Specifically, we will correlate  
12 resilient functioning with the voxel level ICC using a multiple regression analyses in  
13 SPM. Finally, we will calculate functional connectivity maps and network involvement  
14 of the regions found to be associated with resilient functioning.  
15  
16  
17  
18  
19  
20  
21

22 The significance thresholds will be set at  $p < 0.05$  after family-wise error correction for  
23 multiple comparisons across the whole-brain ( $p_{FWE} < 0.05$ ) or the voxels of the  
24 different regions of interest ROIs (i.e., using small volume correction [SVC] procedures  
25 [ $p_{FWE-SVC} < 0.05$ ]).  
26  
27  
28  
29

30 Hypothesis 5 & 6: Individuals with higher resilient functioning will display better  
31 cognitive control and greater levels of social support.  
32  
33

34 We will use Structural Equation Modelling (SEM) to examine the relations and  
35 interrelations described in hypotheses 5 & 6. Specifically, we hypothesise that, using a  
36 multiple indicators multiple causes (MIMIC) model, we will observe that individual  
37 differences in outcome (cognitive functioning) will be explained by partially  
38 independent and complementary neural systems (i.e., all paths shown will be significant  
39 when estimated simultaneously).  
40  
41  
42  
43  
44  
45

46 Hypothesis 7: Neurocognitive mechanisms that facilitate resilient functioning to stress  
47 are related to improved cognitive and emotional functioning at follow up.  
48  
49

50  
51 Using mediation modelling (e.g. Figure 2), we will examine whether the mechanisms  
52 that facilitate resilient functioning to stress are related to improved cognitive and  
53 emotional functioning (i.e., rumination, interpersonal stress, mood, etc.) at follow up.  
54  
55  
56

### 57 *Immunophenotyping analyses*

58  
59 We will assess immunophenotyping data to determine whether or not resilient  
60

1  
2  
3 adolescents can be distinguished in terms of immunophenotype levels. The proportion  
4 of each immune cell type will be used as the predictor variables in a Partial Least  
5 Squares (PLS) analysis, with resilient functioning as the response variable. Using this  
6 method, we hope to identify immune patterns that are associated with resilient  
7 functioning.  
8  
9  
10  
11

## 12 **5. CURRENT STATUS**

13  
14  
15 This study has been reviewed and given favourable opinion by the National Research  
16 Ethics Service, NRES Committee East of England – Cambridge Central and external  
17 reviewers from the Royal Society (RGF\R1\180064 and RGF\EA\180029). We are  
18 currently at year 3 of the project. As of March 2020, 102 participants have been  
19 recruited for the study. From those, 62 have completed phases I, II and II of the study.  
20 Only ten participants have withdrawn following informed consent due to various  
21 reasons (e.g. scheduling conflicts, presence of mental health disorders or found images  
22 presented in the Emotional Regulation Task overly distressing). Additionally, of the  
23 adolescents screened, the most common reasons for ineligibility are MRI  
24 incompatibility (e.g. dental braces), current psychotropic medication, and BMI outside  
25 18-30. Due to the uncertainty caused by the COVID-19 outbreak we cannot anticipate  
26 when we will be able to finish the recruitment of our participants. However, we are  
27 approaching community organizations and agencies across Cambridge, including  
28 agencies working with victims of trauma to aid in the recruitment of participants with  
29 CA, and therefore we anticipate the finalization of the recruitment in three months from  
30 the time we start recruiting again.  
31  
32  
33  
34  
35  
36  
37  
38  
39  
40  
41  
42  
43

## 44 **6. DISCUSSION**

45  
46 The RAISE study aims to examine how resilient adolescents react to psychosocial stress  
47 in order to better understand the neurobiological mechanisms that contribute to  
48 adolescent resilience. We will examine how key biological systems (i.e., the HPA axis  
49 and the immune system) interrelate and interact with brain function and social  
50 influences in order to facilitate resilient functioning after CA. We hypothesize that  
51 resilient functioning would be facilitated by reduced baseline cortisol and cytokine  
52 levels before and after the stressor (i.e., a latent factor constructed by serum hs-CRP and  
53 TNF- $\alpha$  and IL-6 and IL1 $\beta$  levels) as these have been shown to be increased in those  
54  
55  
56  
57  
58  
59  
60

1  
2  
3 with CA, mental illness, reduced stress related brain responses (i.e., amygdala, insula),  
4 and increased modulatory responses in the MPFC and ACC during the MIST.  
5  
6 Moreover, we expect to find that the neurocognitive mechanisms that facilitate resilient  
7  
8 functioning to stress during the in-unit assessment will be related to improved cognitive  
9  
10 and emotional functioning at follow-up (lower rumination, lower interpersonal stress,  
11  
12 improved mood). The findings from this study will help us to determine what sets  
13  
14 resilient individuals apart on a neurobiological level. Such knowledge will be helpful to  
15  
16 inform intervention strategies for individuals with a history of CA to prevent the  
17  
18 development of mental health disorders, and ultimately increase resilience in individuals  
19  
20 who have experienced adversity in early life. Although we will take a dimensional  
21  
22 approach, examining individual variation in degree of resilient functioning and  
23  
24 including individuals with past histories of psychiatric disorders and subthreshold  
25  
26 mental health disorders, the exclusion of patients with current psychiatric disorders will  
27  
28 limit the interpretability of the data and our findings. Future studies should include  
29  
30 participants with current mental health disorders to ensure the representation of both  
31  
32 dimensions of the spectrum.

### 33 34 35 36 37 38 39 40 41 42 43 44 45 46 47 48 49 50 51 52 53 54 55 56 57 58 59 60

## DATA SHARING

Data will be available at the University of Cambridge Repository and accessed upon reasonable request.

## AUTHOR CONTRIBUTIONS

Dr. Laura Moreno-López lead the recruitment and testing of participants and drafted the manuscript. Ms. Samantha N. Sallie, Konstantinos Ioannidis, Muzaffer Kaser, Katja Schueler, Adrian Dahl Askelund and Lorinda Turner were instrumental to the design of the study and reviewed the manuscript. The RAISE consortium members were or are instrumental to the setup and/or assessment of the RAISE study. Dr. Anne-Laura van Harmelen conceptualized and designed the study, drafted the original grant proposal, obtained financial support, oversaw all study procedures, and reviewed and revised this manuscript. All authors approved the final manuscript and agree to be accountable for all aspects of the work presented.

## CONFLICTS OF INTEREST

The authors declare that they have no conflicts of interest associated with this project.

## FUNDING

The RAISE study is funded by two grants from the Royal Society to Dr. Anne-Laura van Harmelen (RGF\EA\180029 & RGF\R1\180064). This work was further supported by a Royal Society Dorothy Hodgkin fellowship for Dr Anne-Laura van Harmelen (DH150176) and a Wolfe Health fellowship for Dr. Laura Moreno-López.

## ACKNOWLEDGMENTS

The authors would like to thank the adolescents and young adults who participated in this project, as well as the research nurses at the Cambridge Clinical Research Facility (Addenbrooke's Hospital) for their contributions towards recruitment of study participants. They also are grateful to current and former members of the Risk and Resilience group who have contributed to this project.

**REFERENCES**

- 1 Agnew-Blais J, Danese A. Childhood maltreatment and unfavourable clinical outcomes in bipolar disorder: A systematic review and meta-analysis. *The Lancet Psychiatry* Published Online First: 2016. doi:10.1016/S2215-0366(15)00544-1
- 2 Hazel NA, Hammen C, Brennan PA, *et al.* Early childhood adversity and adolescent depression: The mediating role of continued stress. *Psychol Med* Published Online First: 2008. doi:10.1017/S0033291708002857
- 3 Hawker DSJ, Boulton MJ. Twenty years' research on peer victimization and psychosocial maladjustment: A meta-analytic review of cross-sectional studies. *J Child Psychol. Psychiatry Allied Discip.* 2000. doi:10.1017/S0021963099005545
- 4 Iffland B, Sansen LM, Catani C, *et al.* Emotional but not physical maltreatment is independently related to psychopathology in subjects with various degrees of social anxiety: A web-based internet survey. *BMC Psychiatry* Published Online First: 2012. doi:10.1186/1471-244X-12-49
- 5 Mullen PE, Martin JL, Anderson JC, *et al.* The long-term impact of the physical, emotional, and sexual abuse of children: A community study. *Child Abus Negl* Published Online First: 1996. doi:10.1016/0145-2134(95)00112-3
- 6 Spinhoven P, Elzinga BM, Hovens JGFM, *et al.* The specificity of childhood adversities and negative life events across the life span to anxiety and depressive disorders. *J Affect Disord* Published Online First: 2010. doi:10.1016/j.jad.2010.02.132
- 7 Vachon DD, Krueger RF, Rogosch FA, *et al.* Assessment of the harmful psychiatric and behavioral effects of different forms of child maltreatment. *JAMA Psychiatry* Published Online First: 2015. doi:10.1001/jamapsychiatry.2015.1792
- 8 Wright MOD, Crawford E, Del Castillo D. Childhood emotional maltreatment and later psychological distress among college students: The mediating role of maladaptive schemas. *Child Abus Negl* Published Online First: 2009. doi:10.1016/j.chiabu.2008.12.007



- 1  
2  
3 9 Danese A, Pariante CM, Caspi A, *et al.* Childhood maltreatment predicts adult  
4 inflammation in a life-course study. *Proc Natl Acad Sci U S A* Published Online  
5 First: 2007. doi:10.1073/pnas.0610362104  
6  
7  
8  
9 10 Egeland B. Taking stock: Childhood emotional maltreatment and developmental  
10 psychopathology. *Child Abus. Negl.* 2009. doi:10.1016/j.chiabu.2008.12.004  
11  
12  
13 11 Majer M, Nater UM, Lin JMS, *et al.* Association of childhood trauma with  
14 cognitive function in healthy adults: A pilot study. *BMC Neurol* Published Online  
15 First: 2010. doi:10.1186/1471-2377-10-61  
16  
17  
18  
19 12 Nanni V, Uher R, Danese A. Childhood maltreatment predicts unfavorable  
20 course of illness and treatment outcome in depression: A meta-analysis. *Am J*  
21 *Psychiatry* Published Online First: 2012. doi:10.1176/appi.ajp.2011.11020335  
22  
23  
24  
25 13 Savitz JB, van der Merwe L, Stein DJ, *et al.* Neuropsychological task  
26 performance in bipolar spectrum illness: Genetics, alcohol abuse, medication and  
27 childhood trauma. *Bipolar Disord* Published Online First: 2008.  
28 doi:10.1111/j.1399-5618.2008.00591.x  
29  
30  
31  
32  
33 14 Shaffer A, Yates TM, Egeland BR. The relation of emotional maltreatment to  
34 early adolescent competence: Developmental processes in a prospective study.  
35 *Child Abus Negl* Published Online First: 2009. doi:10.1016/j.chiabu.2008.12.005  
36  
37  
38  
39 15 Trickett PK, Mennen FE, Kim K, *et al.* Emotional abuse in a sample of multiply  
40 maltreated, urban young adolescents: Issues of definition and identification.  
41 *Child Abus Negl* Published Online First: 2009. doi:10.1016/j.chiabu.2008.12.003  
42  
43  
44  
45 16 Yates TM, Wekerle C. The long-term consequences of childhood emotional  
46 maltreatment on development: (Mal)adaptation in adolescence and young  
47 adulthood. *Child Abus. Negl.* 2009. doi:10.1016/j.chiabu.2008.12.002  
48  
49  
50  
51  
52 17 Pongratz G, Straub RH. The sympathetic nervous response in inflammation.  
53 *Arthritis Res. Ther.* 2014. doi:10.1186/s13075-014-0504-2  
54  
55  
56  
57 18 Danese A, van Harmelen A-L. The hidden wounds of childhood trauma. *Eur J*  
58 *Psychotraumatol* Published Online First: 2017.  
59  
60



- 1  
2  
3 doi:10.1080/20008198.2017.1375840  
4  
5  
6 19 Silverman MN, Sternberg EM. Glucocorticoid regulation of inflammation and its  
7 functional correlates: From HPA axis to glucocorticoid receptor dysfunction.  
8 Ann. N. Y. Acad. Sci. 2012. doi:10.1111/j.1749-6632.2012.06633.x  
9  
10  
11  
12 20 Danese A, Baldwin JR. Hidden Wounds? Inflammatory Links between  
13 Childhood Trauma and Psychopathology. *Annu Rev Psychol* Published Online  
14 First: 2017. doi:10.1146/annurev-psych-010416-044208  
15  
16  
17  
18 21 Nusslock R, Miller GE. Early-life adversity and physical and emotional health  
19 across the lifespan: A neuroimmune network hypothesis. *Biol. Psychiatry*. 2016.  
20 doi:10.1016/j.biopsych.2015.05.017  
21  
22  
23  
24 22 Vecchiarelli HA, Gandhi CP, Gray JM, *et al*. Divergent responses of  
25 inflammatory mediators within the amygdala and medial prefrontal cortex to  
26 acute psychological stress. *Brain Behav Immun* Published Online First: 2016.  
27 doi:10.1016/j.bbi.2015.07.026  
28  
29  
30  
31  
32 23 Davidson RJ, Lewis DA, Alloy LB, *et al*. Neural and behavioral substrates of  
33 mood and mood regulation. *Biol. Psychiatry*. 2002. doi:10.1016/S0006-  
34 3223(02)01458-0  
35  
36  
37  
38 24 Etkin A, Büchel C, Gross JJ. The neural bases of emotion regulation. *Nat. Rev.*  
39 *Neurosci*. 2015. doi:10.1038/nrn4044  
40  
41  
42  
43 25 Johnstone T, Van Reekum CM, Urry HL, *et al*. Failure to regulate:  
44 Counterproductive recruitment of top-down prefrontal-subcortical circuitry in  
45 major depression. *J Neurosci* Published Online First: 2007.  
46 doi:10.1523/JNEUROSCI.2063-07.2007  
47  
48  
49  
50  
51 26 Kim MJ, Whalen PJ. The structural integrity of an amygdala-prefrontal pathway  
52 predicts trait anxiety. *J Neurosci* Published Online First: 2009.  
53 doi:10.1523/JNEUROSCI.2335-09.2009  
54  
55  
56  
57 27 Ochsner KN, Gross JJ. The cognitive control of emotion. *Trends Cogn. Sci.*  
58 2005. doi:10.1016/j.tics.2005.03.010  
59  
60

- 1  
2  
3 28 Wager TD, Davidson ML, Hughes BL, *et al.* Neural mechanisms of emotion  
4 regulation: Evidence for two independent prefrontal-subcortical pathways. *NIH*  
5 *Public Access* 2009.  
6  
7  
8  
9 29 Davidovich S, Collishaw S, Thapar AK, *et al.* Do better executive functions  
10 buffer the effect of current parental depression on adolescent depressive  
11 symptoms? *J Affect Disord* Published Online First: 2016.  
12  
13 doi:10.1016/j.jad.2016.03.049  
14  
15  
16  
17 30 de Lissnyder E, Koster EHW, Derakshan N, *et al.* The association between  
18 depressive symptoms and executive control impairments in response to emotional  
19 and non-emotional information. *Cogn Emot* Published Online First: 2010.  
20  
21 doi:10.1080/02699930903378354  
22  
23  
24  
25 31 Roiser JP, Elliott R, Sahakian BJ. Cognitive mechanisms of treatment in  
26 depression. *Neuropsychopharmacology*. 2012. doi:10.1038/npp.2011.183  
27  
28  
29 32 Van Harmelen AL, Kievit RA, Ioannidis K, *et al.* Adolescent friendships predict  
30 later resilient functioning across psychosocial domains in a healthy community  
31 cohort. *Psychol Med* Published Online First: 2017.  
32  
33 doi:10.1017/S0033291717000836  
34  
35  
36  
37 33 Kalisch R, Baker DG, Basten U, *et al.* The resilience framework as a strategy to  
38 combat stress-related disorders. *Nat. Hum. Behav.* 2017. doi:10.1038/s41562-  
39 017-0200-8  
40  
41  
42  
43 34 Rutter M. Resilience in the face of adversity: Protective factors and resistance to  
44 psychiatric disorder. *Br J Psychiatry* Published Online First: 1985.  
45  
46 doi:10.1192/bjp.147.6.598  
47  
48  
49  
50 35 Moreno-López L, Ioannidis K, Askelund AD, *et al.* The Resilient Emotional  
51 Brain: A Scoping Review of the Medial Prefrontal Cortex and Limbic Structure  
52 and Function in Resilient Adults With a History of Childhood Maltreatment.  
53 *Biol. Psychiatry Cogn. Neurosci. Neuroimaging*. 2020.  
54  
55 doi:10.1016/j.bpsc.2019.12.008  
56  
57  
58  
59 36 Fritz J, de Graaff AM, Caisley H, *et al.* A Systematic Review of Amenable  
60

- 1  
2  
3 Resilience Factors That Moderate and/or Mediate the Relationship Between  
4 Childhood Adversity and Mental Health in Young People. *Front Psychiatry*  
5 Published Online First: 2018. doi:10.3389/fpsyt.2018.00230  
6  
7  
8  
9 37 Askelund AD, Schweizer S, Goodyer IM, *et al.* Positive memory specificity is  
10 associated with reduced vulnerability to depression. *Nat. Hum. Behav.* 2019.  
11 doi:10.1038/s41562-018-0504-3  
12  
13  
14  
15 38 van Harmelen AL, Gibson JL, St Clair MC, *et al.* Friendships and family support  
16 reduce subsequent depressive symptoms in at-risk adolescents. *PLoS One*  
17 Published Online First: 2016. doi:10.1371/journal.pone.0153715  
18  
19  
20  
21 39 Ioannidis K, Askelund AD, Kievit RA, *et al.* The complex neurobiology of  
22 resilient functioning after childhood maltreatment. *BMC Med* Published Online  
23 First: 2020. doi:10.1186/s12916-020-1490-7  
24  
25  
26  
27  
28 40 Charney DS. Psychobiological Mechanism of Resilience and Vulnerability:  
29 Implications for Successful Adaptation to Extreme Stress. *Am. J. Psychiatry.*  
30 2004. doi:10.1176/appi.ajp.161.2.195  
31  
32  
33  
34 41 Russo SJ, Murrough JW, Han MH, *et al.* Neurobiology of resilience. *Nat.*  
35 *Neurosci.* 2012. doi:10.1038/nn.3234  
36  
37  
38  
39 42 Chamberlain SR, Cavanagh J, De Boer P, *et al.* Treatment-resistant depression  
40 and peripheral C-reactive protein. *Br J Psychiatry* Published Online First: 2019.  
41 doi:10.1192/bjp.2018.66  
42  
43  
44  
45 43 Baumeister D, Akhtar R, Ciufolini S, *et al.* Childhood trauma and adulthood  
46 inflammation: A meta-analysis of peripheral C-reactive protein, interleukin-6 and  
47 tumour necrosis factor- $\alpha$ . *Mol Psychiatry* Published Online First: 2016.  
48 doi:10.1038/mp.2015.67  
49  
50  
51  
52 44 Carpenter LL, Gawuga CE, Tyrka AR, *et al.* Association between plasma IL-6  
53 response to acute stress and early-life adversity in healthy adults.  
54 *Neuropsychopharmacology* Published Online First: 2010.  
55 doi:10.1038/npp.2010.159  
56  
57  
58  
59  
60

- 1  
2  
3 45 Danese A, Caspi A, Williams B, *et al.* Biological embedding of stress through  
4 inflammation processes in childhood. *Mol. Psychiatry*. 2011.  
5  
6 doi:10.1038/mp.2010.5  
7  
8  
9  
10 46 Hartwell KJ, Moran-Santa Maria MM, Twal WO, *et al.* Association of elevated  
11 cytokines with childhood adversity in a sample of healthy adults. *J Psychiatr Res*  
12  
13 Published Online First: 2013. doi:10.1016/j.jpsychires.2013.01.008  
14  
15  
16 47 Gunther Moor B, Güroğlu B, Op de Macks ZA, *et al.* Social exclusion and  
17 punishment of excluders: Neural correlates and developmental trajectories.  
18  
19 *Neuroimage* Published Online First: 2012.  
20  
21 doi:10.1016/j.neuroimage.2011.07.028  
22  
23  
24 48 Van Harmelen AL, Hauber K, Moor BG, *et al.* Childhood emotional  
25 maltreatment severity is associated with dorsal medial prefrontal cortex  
26  
27 responsivity to social exclusion in young adults. *PLoS One* Published Online  
28  
29 First: 2014. doi:10.1371/journal.pone.0085107  
30  
31  
32 49 Van Harmelen AL, Van Tol MJ, Dalgleish T, *et al.* Hypoactive medial prefrontal  
33  
34 cortex functioning in adults reporting childhood emotional maltreatment. *Soc*  
35  
36 *Cogn Affect Neurosci* Published Online First: 2013. doi:10.1093/scan/nsu008  
37  
38  
39 50 Gee DG, Gabard-Durnam LJ, Flannery J, *et al.* Early developmental emergence  
40  
41 of human amygdala-prefrontal connectivity after maternal deprivation. *Proc Natl*  
42  
43 *Acad Sci U S A* Published Online First: 2013. doi:10.1073/pnas.1307893110  
44  
45  
46 51 Mehta MA, Golembo NI, Nosarti C, *et al.* Amygdala, hippocampal and corpus  
47  
48 callosum size following severe early institutional deprivation: the English and  
49  
50 Romanian Adoptees study pilot. *J Child Psychol Psychiatry* Published Online  
51  
52 First: 2009. doi:10.1111/j.1469-7610.2009.02084.x  
53  
54  
55 52 Morey RA, Haswell CC, Hooper SR, *et al.* Amygdala, Hippocampus, and  
56  
57 Ventral Medial Prefrontal Cortex Volumes Differ in Maltreated Youth with and  
58  
59 without Chronic Posttraumatic Stress Disorder. *Neuropsychopharmacology*  
60  
61 Published Online First: 2016. doi:10.1038/npp.2015.205  
62  
63  
64  
65  
66  
67  
68  
69  
70  
71  
72  
73  
74  
75  
76  
77  
78  
79  
80  
81  
82  
83  
84  
85  
86  
87  
88  
89  
90  
91  
92  
93  
94  
95  
96  
97  
98  
99  
100  
101  
102  
103  
104  
105  
106  
107  
108  
109  
110  
111  
112  
113  
114  
115  
116  
117  
118  
119  
120  
121  
122  
123  
124  
125  
126  
127  
128  
129  
130  
131  
132  
133  
134  
135  
136  
137  
138  
139  
140  
141  
142  
143  
144  
145  
146  
147  
148  
149  
150  
151  
152  
153  
154  
155  
156  
157  
158  
159  
160  
161  
162  
163  
164  
165  
166  
167  
168  
169  
170  
171  
172  
173  
174  
175  
176  
177  
178  
179  
180  
181  
182  
183  
184  
185  
186  
187  
188  
189  
190  
191  
192  
193  
194  
195  
196  
197  
198  
199  
200  
201  
202  
203  
204  
205  
206  
207  
208  
209  
210  
211  
212  
213  
214  
215  
216  
217  
218  
219  
220  
221  
222  
223  
224  
225  
226  
227  
228  
229  
230  
231  
232  
233  
234  
235  
236  
237  
238  
239  
240  
241  
242  
243  
244  
245  
246  
247  
248  
249  
250  
251  
252  
253  
254  
255  
256  
257  
258  
259  
260  
261  
262  
263  
264  
265  
266  
267  
268  
269  
270  
271  
272  
273  
274  
275  
276  
277  
278  
279  
280  
281  
282  
283  
284  
285  
286  
287  
288  
289  
290  
291  
292  
293  
294  
295  
296  
297  
298  
299  
300  
301  
302  
303  
304  
305  
306  
307  
308  
309  
310  
311  
312  
313  
314  
315  
316  
317  
318  
319  
320  
321  
322  
323  
324  
325  
326  
327  
328  
329  
330  
331  
332  
333  
334  
335  
336  
337  
338  
339  
340  
341  
342  
343  
344  
345  
346  
347  
348  
349  
350  
351  
352  
353  
354  
355  
356  
357  
358  
359  
360  
361  
362  
363  
364  
365  
366  
367  
368  
369  
370  
371  
372  
373  
374  
375  
376  
377  
378  
379  
380  
381  
382  
383  
384  
385  
386  
387  
388  
389  
390  
391  
392  
393  
394  
395  
396  
397  
398  
399  
400  
401  
402  
403  
404  
405  
406  
407  
408  
409  
410  
411  
412  
413  
414  
415  
416  
417  
418  
419  
420  
421  
422  
423  
424  
425  
426  
427  
428  
429  
430  
431  
432  
433  
434  
435  
436  
437  
438  
439  
440  
441  
442  
443  
444  
445  
446  
447  
448  
449  
450  
451  
452  
453  
454  
455  
456  
457  
458  
459  
460  
461  
462  
463  
464  
465  
466  
467  
468  
469  
470  
471  
472  
473  
474  
475  
476  
477  
478  
479  
480  
481  
482  
483  
484  
485  
486  
487  
488  
489  
490  
491  
492  
493  
494  
495  
496  
497  
498  
499  
500  
501  
502  
503  
504  
505  
506  
507  
508  
509  
510  
511  
512  
513  
514  
515  
516  
517  
518  
519  
520  
521  
522  
523  
524  
525  
526  
527  
528  
529  
530  
531  
532  
533  
534  
535  
536  
537  
538  
539  
540  
541  
542  
543  
544  
545  
546  
547  
548  
549  
550  
551  
552  
553  
554  
555  
556  
557  
558  
559  
560  
561  
562  
563  
564  
565  
566  
567  
568  
569  
570  
571  
572  
573  
574  
575  
576  
577  
578  
579  
580  
581  
582  
583  
584  
585  
586  
587  
588  
589  
590  
591  
592  
593  
594  
595  
596  
597  
598  
599  
600  
601  
602  
603  
604  
605  
606  
607  
608  
609  
610  
611  
612  
613  
614  
615  
616  
617  
618  
619  
620  
621  
622  
623  
624  
625  
626  
627  
628  
629  
630  
631  
632  
633  
634  
635  
636  
637  
638  
639  
640  
641  
642  
643  
644  
645  
646  
647  
648  
649  
650  
651  
652  
653  
654  
655  
656  
657  
658  
659  
660  
661  
662  
663  
664  
665  
666  
667  
668  
669  
670  
671  
672  
673  
674  
675  
676  
677  
678  
679  
680  
681  
682  
683  
684  
685  
686  
687  
688  
689  
690  
691  
692  
693  
694  
695  
696  
697  
698  
699  
700  
701  
702  
703  
704  
705  
706  
707  
708  
709  
710  
711  
712  
713  
714  
715  
716  
717  
718  
719  
720  
721  
722  
723  
724  
725  
726  
727  
728  
729  
730  
731  
732  
733  
734  
735  
736  
737  
738  
739  
740  
741  
742  
743  
744  
745  
746  
747  
748  
749  
750  
751  
752  
753  
754  
755  
756  
757  
758  
759  
760  
761  
762  
763  
764  
765  
766  
767  
768  
769  
770  
771  
772  
773  
774  
775  
776  
777  
778  
779  
780  
781  
782  
783  
784  
785  
786  
787  
788  
789  
790  
791  
792  
793  
794  
795  
796  
797  
798  
799  
800  
801  
802  
803  
804  
805  
806  
807  
808  
809  
810  
811  
812  
813  
814  
815  
816  
817  
818  
819  
820  
821  
822  
823  
824  
825  
826  
827  
828  
829  
830  
831  
832  
833  
834  
835  
836  
837  
838  
839  
840  
841  
842  
843  
844  
845  
846  
847  
848  
849  
850  
851  
852  
853  
854  
855  
856  
857  
858  
859  
860  
861  
862  
863  
864  
865  
866  
867  
868  
869  
870  
871  
872  
873  
874  
875  
876  
877  
878  
879  
880  
881  
882  
883  
884  
885  
886  
887  
888  
889  
890  
891  
892  
893  
894  
895  
896  
897  
898  
899  
900  
901  
902  
903  
904  
905  
906  
907  
908  
909  
910  
911  
912  
913  
914  
915  
916  
917  
918  
919  
920  
921  
922  
923  
924  
925  
926  
927  
928  
929  
930  
931  
932  
933  
934  
935  
936  
937  
938  
939  
940  
941  
942  
943  
944  
945  
946  
947  
948  
949  
950  
951  
952  
953  
954  
955  
956  
957  
958  
959  
960  
961  
962  
963  
964  
965  
966  
967  
968  
969  
970  
971  
972  
973  
974  
975  
976  
977  
978  
979  
980  
981  
982  
983  
984  
985  
986  
987  
988  
989  
990  
991  
992  
993  
994  
995  
996  
997  
998  
999  
1000

- 1  
2  
3 orbitofrontal volumes in child abuse-related complex PTSD. *J Clin Psychiatry*  
4 Published Online First: 2010. doi:10.4088/JCP.08m04754blu  
5  
6  
7  
8 54 Tottenham N, Hare TA, Quinn BT, *et al.* Prolonged institutional rearing is  
9 associated with atypically large amygdala volume and difficulties in emotion  
10 regulation. *Dev Sci* Published Online First: 2010. doi:10.1111/j.1467-  
11 7687.2009.00852.x  
12  
13  
14  
15 55 Van Rooij SJH, Kennis M, Sjouwerman R, *et al.* Smaller hippocampal volume as  
16 a vulnerability factor for the persistence of post-traumatic stress disorder. *Psychol*  
17 *Med* Published Online First: 2015. doi:10.1017/S0033291715000707  
18  
19  
20  
21 56 Vythilingam M, Heim C, Newport J, *et al.* Childhood trauma associated with  
22 smaller hippocampal volume in women with major depression. *Am J Psychiatry*  
23 Published Online First: 2002. doi:10.1176/appi.ajp.159.12.2072  
24  
25  
26  
27  
28 57 Whittle S, Dennison M, Vijayakumar N, *et al.* Childhood maltreatment and  
29 psychopathology affect brain development during adolescence. *J Am Acad Child*  
30 *Adolesc Psychiatry* Published Online First: 2013. doi:10.1016/j.jaac.2013.06.007  
31  
32  
33  
34 58 Gee DG, Gabard-Durnam L, Telzer EH, *et al.* Maternal Buffering of Human  
35 Amygdala-Prefrontal Circuitry During Childhood but Not During Adolescence.  
36 *Psychol Sci* Published Online First: 2014. doi:10.1177/0956797614550878  
37  
38  
39  
40 59 Rasmussen LJH, Moffitt TE, Eugen-Olsen J, *et al.* Cumulative childhood risk is  
41 associated with a new measure of chronic inflammation in adulthood. *J Child*  
42 *Psychol Psychiatry Allied Discip* Published Online First: 2019.  
43 doi:10.1111/jcpp.12928  
44  
45  
46  
47  
48 60 Schönbrodt FD, Perugini M. At what sample size do correlations stabilize? *J Res*  
49 *Pers* Published Online First: 2013. doi:10.1016/j.jrp.2013.05.009  
50  
51  
52  
53 61 Angold A, Costello J, Van Kammen W, *et al.* Development of a short  
54 questionnaire for use in epidemiological studies of depression in children and  
55 adolescents: factor composition and structure across development. *Int J Methods*  
56 *Psychiatr Res* 1996.  
57  
58  
59  
60

- 1  
2  
3 62 Reynolds CR, Richmond BO. What I think and feel: A revised measure of  
4 children's manifest anxiety. *J Abnorm Child Psychol* Published Online First:  
5 1997. doi:10.1023/A:1025751206600  
6  
7  
8  
9 63 Bamber D, Tamplin A, Park RJ, *et al.* Development of a Short Leyton  
10 Obsessional Inventory for Children and Adolescents. *J Am Acad Child Adolesc*  
11 *Psychiatry* Published Online First: 2002. doi:10.1097/00004583-200210000-  
12 00015  
13  
14  
15  
16  
17 64 Kessler RC, Andrews G, Colpe LJ, *et al.* Short screening scales to monitor  
18 population prevalences and trends in non-specific psychological distress. *Psychol*  
19 *Med* Published Online First: 2002. doi:10.1017/S0033291702006074  
20  
21  
22  
23 65 Achenbach T. *Manual for Child Behavior Checklist/ 4-18 and 1991 Profile.*  
24 University. Burlington: 1991.  
25  
26  
27  
28 66 Tennant R, Hiller L, Fishwick R, *et al.* The Warwick-Dinburgh mental well-  
29 being scale (WEMWBS): Development and UK validation. *Health Qual Life*  
30 *Outcomes* Published Online First: 2007. doi:10.1186/1477-7525-5-63  
31  
32  
33  
34 67 Parker G, Roussos J, Hadzi-Pavlovic D, *et al.* The development of a refined  
35 measure of dysfunctional parenting and assessment of its relevance in patients  
36 with affective disorders. *Psychol Med* Published Online First: 1997.  
37 doi:10.1017/S003329179700545X  
38  
39  
40  
41  
42 68 Elgar FJ, Waschbusch DA, Dadds MR, *et al.* Development and Validation of a  
43 Short Form of the Alabama Parenting Questionnaire. *J Child Fam Stud* Published  
44 Online First: 2007. doi:10.1007/s10826-006-9082-5  
45  
46  
47  
48 69 Epstein NB, Baldwin LM, Bishop DS. THE McMASTER FAMILY  
49 ASSESSMENT DEVICE. *J Marital Fam Ther* Published Online First: 1983.  
50 doi:10.1111/j.1752-0606.1983.tb01497.x  
51  
52  
53  
54 70 Miller IW, Epstein NB, Bishop DS, *et al.* THE McMASTER FAMILY  
55 ASSESSMENT DEVICE: RELIABILITY AND VALIDITY. *J Marital Fam*  
56 *Ther* Published Online First: 1985. doi:10.1111/j.1752-0606.1985.tb00028.x  
57  
58  
59  
60

- 1  
2  
3 71 Rosenberg M. *Society and the adolescent self-image*. 2015.  
4 doi:10.1177/003803856900300250  
5  
6  
7 72 Bernstein DP, Fink L, Handelsman L, *et al*. Initial reliability and validity of a  
8 new retrospective measure of child abuse and neglect. *Am J Psychiatry* Published  
9 Online First: 1994. doi:10.1176/ajp.151.8.1132  
10  
11  
12  
13 73 Cassels M, van Harmelen AL, Neufeld S, *et al*. Poor family functioning mediates  
14 the link between childhood adversity and adolescent nonsuicidal self-injury. *J*  
15 *Child Psychol Psychiatry Allied Discip* Published Online First: 2018.  
16 doi:10.1111/jcpp.12866  
17  
18  
19  
20  
21 74 Preston SD, Stansfield RB. I know how you feel: Task-irrelevant facial  
22 expressions are spontaneously processed at a semantic level. *Cogn Affect Behav*  
23 *Neurosci* Published Online First: 2008. doi:10.3758/CABN.8.1.54  
24  
25  
26  
27 75 Kanske P, Heissler J, Schönfelder S, *et al*. How to regulate emotion? Neural  
28 networks for reappraisal and distraction. *Cereb Cortex* Published Online First:  
29 2011. doi:10.1093/cercor/bhq216  
30  
31  
32  
33 76 Zhou X, Fragala MS, McElhaney JE, *et al*. Conceptual and methodological issues  
34 relevant to cytokine and inflammatory marker measurements in clinical research.  
35 *Curr. Opin. Clin. Nutr. Metab. Care*. 2010. doi:10.1097/MCO.0b013e32833cf3bc  
36  
37  
38  
39 77 Sheehan D V., Lecrubier Y, Sheehan KH, *et al*. The Mini-International  
40 Neuropsychiatric Interview (M.I.N.I.): The development and validation of a  
41 structured diagnostic psychiatric interview for DSM-IV and ICD-10. In: *Journal*  
42 *of Clinical Psychiatry*. 1998.  
43  
44  
45  
46  
47 78 Oldfield RC. The assessment and analysis of handedness: The Edinburgh  
48 inventory. *Neuropsychologia* Published Online First: 1971. doi:10.1016/0028-  
49 3932(71)90067-4  
50  
51  
52  
53 79 Cleghorn CL, Harrison RA, Ransley JK, *et al*. Can a dietary quality score derived  
54 from a short-form FFQ assess dietary quality in UK adult population surveys?  
55 *Public Health Nutr* Published Online First: 2016.  
56 doi:10.1017/S1368980016001099  
57  
58  
59  
60



- 1  
2  
3 80 Dumont R, Willis JO, Veizel K, *et al.* Wechsler Abbreviated Scale of  
4 Intelligence. In: *Encyclopedia of Special Education*. 2014.  
5  
6 doi:10.1002/9781118660584.es2519  
7  
8
- 9 81 Steptoe A, Hamer M, Chida Y. The effects of acute psychological stress on  
10 circulating inflammatory factors in humans: A review and meta-analysis. *Brain*.  
11 *Behav. Immun.* 2007. doi:10.1016/j.bbi.2007.03.011  
12  
13  
14
- 15 82 Spielberger CD. State-Trait Anxiety Inventory. In: *The Corsini Encyclopedia of*  
16 *Psychology*. 2010. doi:10.1002/9780470479216.corpsy0943  
17  
18  
19
- 20 83 Dedovic K, Renwick R, Mahani NK, *et al.* The Montreal Imaging Stress Task:  
21 Using functional imaging to investigate the effects of perceiving and processing  
22 psychosocial stress in the human brain. In: *Journal of Psychiatry and*  
23 *Neuroscience*. 2005.  
24  
25  
26
- 27 84 Goodyer IM, Herbert J, Tamplin A, *et al.* Short-term outcome of major  
28 depression: II. Life events, family dysfunction, and friendship difficulties as  
29 predictors of persistent disorder. *J Am Acad Child Adolesc Psychiatry* Published  
30 Online First: 1997. doi:10.1097/00004583-199704000-00009  
31  
32  
33  
34
- 35 85 Cohen S, Kamarck T, Mermelstein R. A global measure of perceived stress. *J*  
36 *Health Soc Behav* Published Online First: 1983. doi:10.2307/2136404  
37  
38  
39
- 40 86 Harb GC, Heimberg RG, Fresco DM, *et al.* The psychometric properties of the  
41 Interpersonal Sensitivity Measure in social anxiety disorder. *Behav Res Ther*  
42 Published Online First: 2002. doi:10.1016/S0005-7967(01)00125-5  
43  
44  
45
- 46 87 Treynor W, Gonzalez R, Nolen-Hoeksema S. Rumination reconsidered: A  
47 psychometric analysis. *Cognit Ther Res* Published Online First: 2003.  
48 doi:10.1023/A:1023910315561  
49  
50  
51
- 52 88 Bellingrath S, Rohleder N, Kudielka BM. Effort-reward-imbalance in healthy  
53 teachers is associated with higher LPS-stimulated production and lower  
54 glucocorticoid sensitivity of interleukin-6 in vitro. *Biol Psychol* Published Online  
55 First: 2013. doi:10.1016/j.biopsycho.2012.12.003  
56  
57  
58  
59  
60

- 1  
2  
3 89 Decker ML, Grobusch MP, Ritz N. Influence of age and other factors on  
4 cytokine expression profiles in healthy children-A systematic review. *Front.*  
5 *Pediatr.* 2017. doi:10.3389/fped.2017.00255  
6  
7  
8  
9 90 Derijk RH, Petrides J, Deuster P, *et al.* Changes in corticosteroid sensitivity of  
10 peripheral blood lymphocytes after strenuous exercise in humans. *J Clin*  
11 *Endocrinol Metab* Published Online First: 1996. doi:10.1210/jc.81.1.228  
12  
13  
14  
15 91 Khoury JE, Gonzalez A, Levitan RD, *et al.* Summary cortisol reactivity  
16 indicators: Interrelations and meaning. *Neurobiol Stress* Published Online First:  
17 2015. doi:10.1016/j.ynstr.2015.04.002  
18  
19  
20  
21 92 Fekedulegn DB, Andrew ME, Burchfiel CM, *et al.* Area under the curve and  
22 other summary indicators of repeated waking cortisol measurements. *Psychosom*  
23 *Med* Published Online First: 2007. doi:10.1097/PSY.0b013e31814c405c  
24  
25  
26  
27 93 Martuzzi R, Ramani R, Qiu M, *et al.* A whole-brain voxel based measure of  
28 intrinsic connectivity contrast reveals local changes in tissue connectivity with  
29 anesthetic without a priori assumptions on thresholds or regions of interest.  
30 *Neuroimage* Published Online First: 2011.  
31 doi:10.1016/j.neuroimage.2011.06.075  
32  
33  
34  
35  
36  
37  
38  
39  
40  
41  
42  
43  
44  
45  
46  
47  
48  
49  
50  
51  
52  
53  
54  
55  
56  
57  
58  
59  
60

## FIGURE LEGENDS:

**Figure 1.** The complex neurobiology of resilience after childhood maltreatment (CM) [39]. Resilient functioning in those individuals who have experienced CM may be facilitated by larger prefrontal cortex (PFC) and hippocampal volume and connectivity, the ability to adequately regulate emotions and dampen stress responsivity, cortisol and proinflammatory baseline and responses, polygenic resilience effects, social support from the immediate environment, and the wider ecology. For readability, the location of the hippocampus is not correct. 5-HTTLPR serotonin-transporter-linked polymorphic region, ACTH adrenocorticotrophic hormone; BDNF brain-derived neurotrophic factor, FKBP5 FK binding protein 5, IL-6 interleukin 6, MAOA monoamine oxidase A, mPFC medial PFC, NPY neuropeptide-Y, TNF $\alpha$ , tumour necrosis factor- $\alpha$ .

**Figure 2.** Risk to Resilient functioning in the NSPN sample of N=1980 adolescents [32]. Green and red lines indicate functioning that is better or 'resilient' (green) or worse 'vulnerable' (red) than expected. Psychosocial functioning reflects a factor score (mean=0, SD=1) derived from multiple measures of psychiatric symptomatology, personality traits, and mental wellbeing. CA reflects a factor score (mean=0, SD=1) from two measures which assess early life family experiences.

**Figure 3.** The neuro-immune network hypothesis of child maltreatment. Inflammatory protein and brain responses to psychosocial stress mediate the relationship between CA and psychological functioning.

**Figure 4.** Summary of the study protocol. Abbreviations: APQ=Alabama Parenting Questionnaire, CBC=Child Behaviours Checklist; CFQ=Cambridge Friendship Questionnaire, CTQ=Childhood Trauma Questionnaire, DASI=Drugs Alcohol and Self-Injury, EHI=Edinburgh Handedness Inventory, ERT=Emotion Regulation Task, FAD=Family Assessment Device, IPSM=Interpersonal Sensitivity Measure, K10=Kessler Psychological Distress Scale, LEQ=Life-Events Questionnaire, LOI=Leyton Obsessional Inventory, MFQ=Mood and Feelings Questionnaire, MINI=Mini-International Neuropsychiatric Interview, MIST=Montreal Imaging Stress Task, MOPS=Measure of Parenting Style, MPRAGE=T1-Weighted rapid three-dimensional radient-echo, PSS=Perceived Stress Scale, RCMAS=Revised Children's

1  
2  
3 Manifest Anxiety Scale, RRS-10=Ruminative Response Scale, RSES=Rosenberg Self-  
4 Esteem Scale, rs-fMRI=Resting state functional magnetic resonance imaging,  
5 SFFFQ=Short-Form Frequency Food Questionnaire, STAI=State-Trait Anxiety  
6 Inventory, WASI=Wechsler Abbreviated Scale of Intelligence, WEMWBS=Warwick-  
7 Edinburgh Mental Well-Being Scale.  
8  
9  
10  
11  
12

13 **Figure 5.** Venepuncture protocol. Bloods will be acquired at 4 time points: (-T1) 45  
14 min before the start of the task, (T0) Just before the start of the task (T30) right after the  
15 start of the task, (T80) 80 min after the start of the task.  
16  
17  
18  
19  
20  
21  
22  
23  
24  
25  
26  
27  
28  
29  
30  
31  
32  
33  
34  
35  
36  
37  
38  
39  
40  
41  
42  
43  
44  
45  
46  
47  
48  
49  
50  
51  
52  
53  
54  
55  
56  
57  
58  
59  
60

For peer review only

**RAISE Consortium list of authors:**

Alicia J. Smith<sup>1,2</sup>, Camilla Nord<sup>2</sup>, Eugenia M. Davidson<sup>1</sup>, Nadia González-García<sup>3</sup>,  
Oksana Berhe<sup>4</sup>, Paul Fletcher<sup>1,5</sup>, Paul Wilkinson<sup>1,5</sup>, Rosalie Shrofer<sup>1</sup>, Sofía Orellana<sup>1</sup>,  
Sophie L. Bellow<sup>1</sup>, Suzanne Schweizer<sup>2,6</sup>

<sup>1</sup> Department of Psychiatry, University of Cambridge, UK.

<sup>2</sup> Medical Research Council Cognition and Brain Sciences Unit, University of Cambridge, UK.

<sup>3</sup> Hospital Infantil de México Federico Gómez. Laboratorio de Neurociencias, Ciudad de México, México.

<sup>4</sup> Department of Psychiatry and Psychotherapy, Central Institute of Mental Health, Medical Faculty Mannheim, University of Heidelberg, Mannheim, Germany.

<sup>5</sup> Cambridgeshire and Peterborough NHS Foundation Trust, Fulbourn, United Kingdom

<sup>6</sup> Institute of Cognitive Neuroscience, University College London, London, UK.

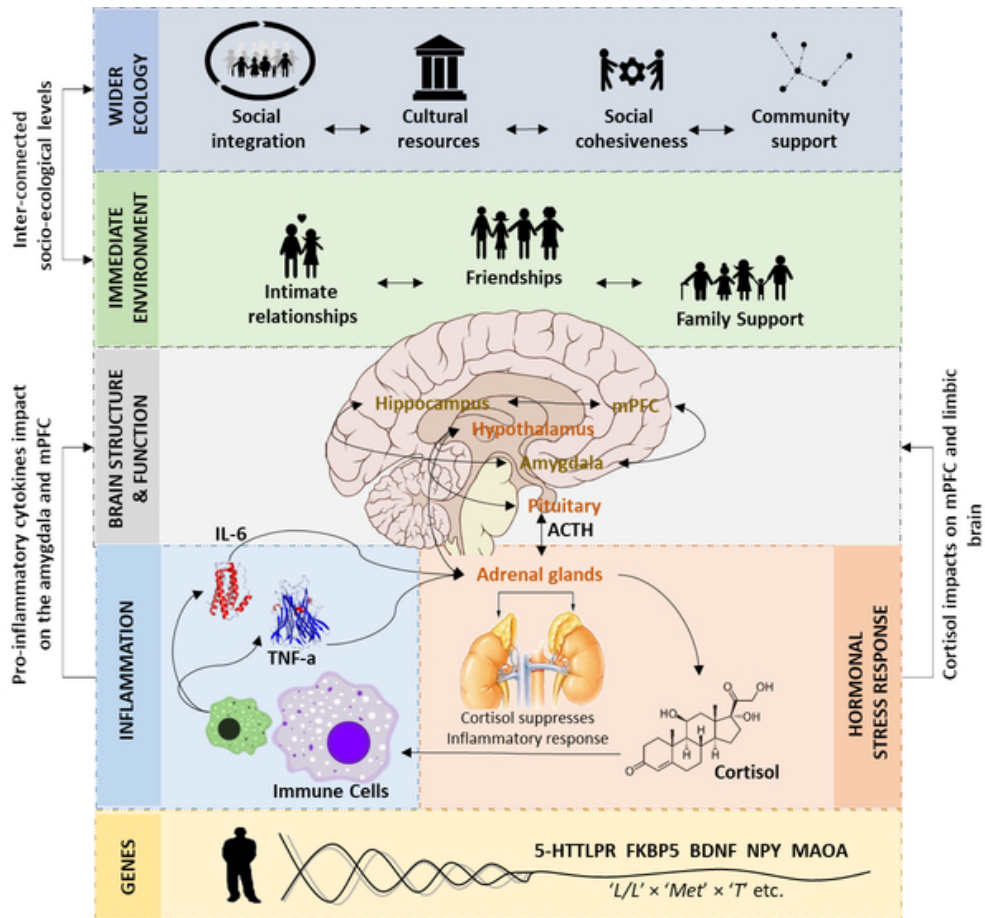

Figure 1. The complex neurobiology of resilience after childhood maltreatment (CM) [39]. Resilient functioning in those individuals who have experienced CM may be facilitated by larger prefrontal cortex (PFC) and hippocampal volume and connectivity, the ability to adequately regulate emotions and dampen stress responsivity, cortisol and proinflammatory baseline and responses, polygenic resilience effects, social support from the immediate environment, and the wider ecology. For readability, the location of the hippocampus is not correct. 5-HTTLPR serotonin-transporter-linked polymorphic region, ACTH adrenocorticotropic hormone; BDNF brain-derived neurotrophic factor, FKBP5 FK binding protein 5, IL-6 interleukin 6, MAOA monoamine oxidase A, mPFC medial PFC, NPY neuropeptide-Y, TNF $\alpha$ , tumour necrosis factor- $\alpha$ .

25x23mm (600 x 600 DPI)

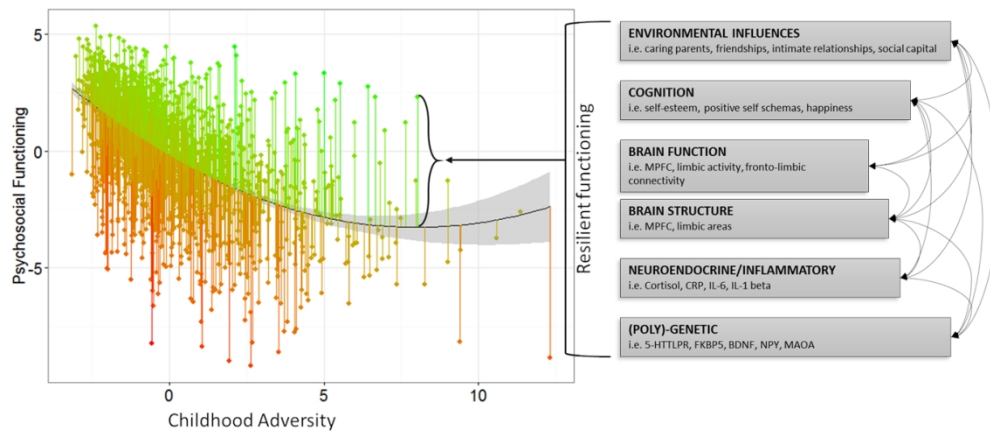

Figure 2. Risk to Resilient functioning in the NSPN sample of N=1980 adolescents (35). Green and red lines indicate functioning that is better or 'resilient' (green) or worse 'vulnerable' (red) than expected. Psychosocial functioning reflects a factor score (mean=0, SD=1) derived from multiple measures of psychiatric symptomatology, personality traits, and mental wellbeing. CA reflects a factor score (mean=0, SD=1) from two measures which assess early life family experiences.



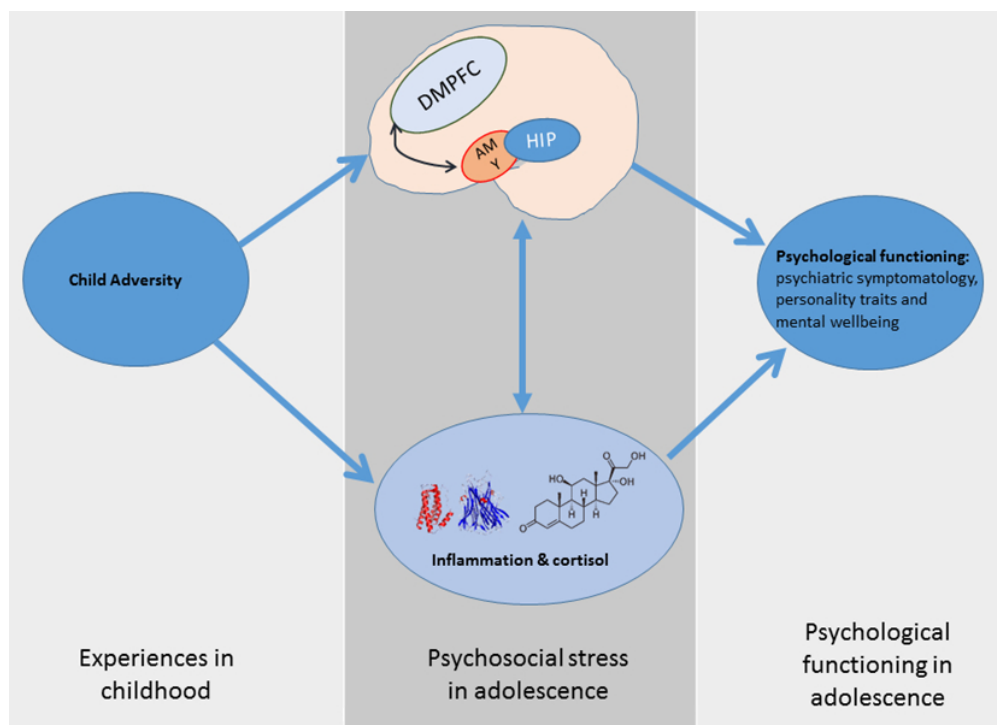

Figure 3. The neuro-immune network hypothesis of child maltreatment. Inflammatory protein and brain responses to psychosocial stress mediate the relationship between CA and psychological functioning.

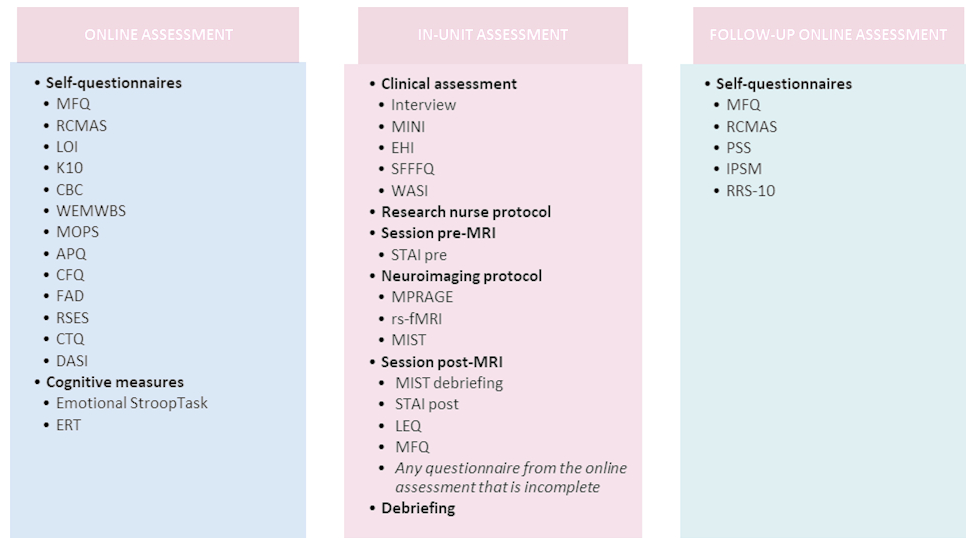

Figure 4. Summary of the study protocol. Abbreviations: APQ=Alabama Parenting Questionnaire, CBC=Child Behaviours Checklist, CFQ=Cambridge Friendship Questionnaire, CTQ=Childhood Trauma Questionnaire, DASi=Drugs Alcohol and Self-Injury, EHI=Edinburgh Handedness Inventory, ERT=Emotion Regulation Task, FAD=Family Assessment Device, IPSM=Interpersonal Sensitivity Measure, K10=Kessler Psychological Distress Scale, LEQ=Life-Events Questionnaire, LOI=Leyton Obsessional Inventory, MFQ=Mood and Feelings Questionnaire, MINI=Mini-International Neuropsychiatric Interview, MIST=Montreal Imaging Stress Task, MOPS=Measure of Parenting Style, MPRAGE=T1-Weighted rapid three-dimensional radiance-echo, PSS=Perceived Stress Scale, RCMAS=Revised Children's Manifest Anxiety Scale, RRS-10=Ruminative Response Scale, RSES=Rosenberg Self-Esteem Scale, rs-fMRI=Resting state functional magnetic resonance imaging, SFFFQ=Short-Form Frequency Food Questionnaire, STAI=State-Trait Anxiety Inventory, WASI=Wechsler Abbreviated Scale of Intelligence, WEMWBS=Warwick-Edinburgh Mental Well-Being Scale.

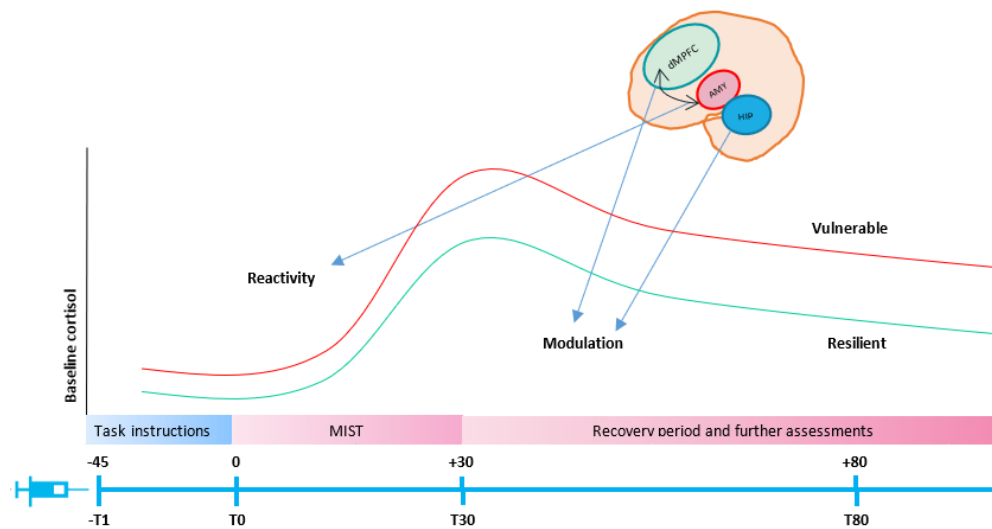

Figure 5. Venepuncture protocol. Bloods will be acquired at 4 time points: (-T1) 45 min before the start of the task, (T0) Just before the start of the task (T30) right after the start of the task, (T80) 80 min after the start of the task.

## Supplementary Material

### The RAISE study protocol; a cross-sectional, multi-level, neurobiological study of studying resilience after individual stress exposure

Laura Moreno-López<sup>1,\*</sup>, Samantha N. Sallie<sup>2</sup>, Konstantinos Ioannidis<sup>3,4</sup>, Muzaffer Kaser<sup>5,6</sup>, Katja Schueler<sup>7</sup>, Adrian Dahl Askelund<sup>8</sup>, Lorinda Turner<sup>9</sup>, RAISE Consortium, & Anne-Laura van Harmelen<sup>10,\*</sup>

#### Contents

|                                       |    |
|---------------------------------------|----|
| Measures used in Phase I.....         | 2  |
| Psychological functioning .....       | 2  |
| Child adversity.....                  | 4  |
| Cognitive functioning.....            | 4  |
| Measures used in Phase II .....       | 5  |
| Clinical evaluation.....              | 5  |
| Neuroimaging protocol.....            | 6  |
| Measures used in Phase III.....       | 7  |
| Risk and ethical issues.....          | 9  |
| Consent.....                          | 9  |
| Confidentiality.....                  | 9  |
| Risks and cost of participation ..... | 10 |
| Compensation for participation .....  | 12 |
| References .....                      | 13 |

## Measures used in Phase I

### Psychological functioning

*Mood and Feelings Questionnaire.* The Mood and Feelings Questionnaire (MFQ; Angold et al., 1995) is a 33-item instrument that was developed to measure depressive symptoms (over the course of two weeks prior and up to the date of the assessment) in children and adolescents from 8- to 18-year-olds. The MFQ has shown prognostic validity in clinical and non-clinical samples (Daviss et al., 2006; Wood et al., 1995). Higher sum scores indicate more symptoms.

*Revised Children's Manifest Anxiety Scale.* The Revised Children's Manifest Anxiety Scale (RCMAS; Reynolds & Richmond, 1978) is a 37-item questionnaire that includes three anxiety factors (physiological anxiety, worry/oversensitivity, and social concerns/concentration), as well as a total anxiety score. A higher score indicates a high level of anxiety.

*Leyton Obsessional Inventory.* The Leyton Obsessional Inventory (LOI; Bamber et al., 2002) is an 11-item questionnaire that measures obsessional/anxiety symptoms. Responses ranged from 'always,' 'mostly,' 'sometimes,' to 'never.' Higher scores indicate more obsessions.

*Kessler Psychological Distress Scale.* The 10-item version of the Kessler Psychological Distress Scale (K10; Kessler et al., 2002) measures frequency of nervousness, hopelessness, sadness, worthlessness, and fatigue. Responses are summed to create a total score, with higher scores signifying more psychological distress.

*Child Behaviours checklist.* The Child Behaviours Checklist (CBC) is an 11-item questionnaire for symptoms of antisocial behaviour based on the Diagnostic and Statistical Manual (DSM-IV) conduct disorder definition (Achenbach, 1991). Responses on these items ranged from 'always', 'mostly', 'sometimes' to 'never'. Internal consistency of the measure has been found to be good (Cronbach's  $\alpha = 0.89$ ) (Rubio-Stipec et al., 1990). A high score indicates greater emotional and behavioural problems.

1  
2  
3 *Warwick-Edinburgh Mental Well-being Scale.* The Warwick-Edinburgh Mental Well-being Scale (WEMWBS; Tennant et al., 2007) was developed to enable the monitoring  
4 of mental wellbeing in the general population; and the evaluation of projects, programs,  
5 and policies aiming to improve mental wellbeing in the UK. It comprises 14 positively  
6 worded statements with five response categories from 'none of the time' to 'all of the  
7 time.' Higher scores indicate better mental well-being.  
8  
9

10  
11  
12  
13  
14 *Cambridge Friendship Questionnaire.* The Cambridge Friendship Questionnaire (CFQ)  
15 is an 8-item questionnaire assessing the number, availability, and quality of friendships.  
16 Higher scores indicate better perceived overall quality of friendships. The CFQ has  
17 good measurement invariance and external validity, and has demonstrated ecological  
18 validity across two samples (van Harmelen et al., 2016).  
19  
20  
21  
22

23  
24 *Family Assessment Device.* The Family Assessment Device (FAD; Epstein et al., 1983;  
25 Miller et al., 1985) is a 12-item scale measuring overall functioning of the family. Six  
26 items describe healthy functioning and the other six describe unhealthy functioning.  
27 Each item is rated on a 4-point Likert scale (4='strongly agree,' 3='agree,' 2='disagree,'  
28 1='strongly disagree'). The higher the score the worse the family functioning.  
29  
30  
31  
32

33  
34 *Rosenberg Self-Esteem Scale.* The Rosenberg Self-Esteem Scale (RSES; Petersen,  
35 1975) is a 10-item scale that measures positive and negative feelings of self-worth. All  
36 items are answered using a 4-point Likert scale format ranging from strongly agree to  
37 strongly disagree. Lower scores indicate lower self-esteem.  
38  
39  
40

41  
42 *Childhood Trauma Questionnaire.* The Childhood Trauma Questionnaire (CTQ;  
43 Bernstein et al., 1994) is a standardised, retrospective 28-item self-report inventory that  
44 measures the severity of different types of childhood trauma, producing five clinical  
45 subscales: emotional abuse, physical abuse, sexual abuse, emotional neglect, and  
46 physical neglect. Participants respond to each item in the context of 'when you were  
47 growing up' and answer according to a 5-point Likert scale ranging from 1='never' to  
48 5='very often.' The score ranges from 5 to 25 for each subscale, with scores falling into  
49 four categories: none to low trauma exposure, low to moderate trauma exposure,  
50 moderate to severe trauma exposure, and severe to extreme trauma exposure. The  
51 measure also includes a 3-item minimisation/denial scale indicating the potential  
52 underreporting of maltreatment.  
53  
54  
55  
56  
57  
58  
59  
60

1  
2  
3 *Drugs Alcohol and Self-injury.* The drugs, alcohol, and self-injury inventory (DASI;  
4 Cassels et al., 2018) is a 14-item self-report measure of cigarette, alcohol, and drug use,  
5 and non-suicidal self-injury.  
6  
7

### 8 9 **Child adversity**

10  
11 *Measure of Parenting Style.* The Measure of Parenting Style (MOPS; Parker et al.,  
12 1997) is a questionnaire designed to assess different approaches to parenting during the  
13 first 16 years of life. Participants have to evaluate each parent based on 15 statements  
14 (e.g., ‘overprotective of me’ and ‘uncaring of me’) using a four-point scale, yielding  
15 total scores for each parent on subscales labelled ‘indifference,’ ‘abuse,’ and ‘over-  
16 control.’ The sum scores of items in each category indicate the degree to which that  
17 parenting style was experienced by an individual.  
18

19 *The Alabama Parenting Questionnaire.* The Alabama Parenting Questionnaire (APQ;  
20 Elgar et al., 2007) measures parenting practices. Participants are asked to rate how  
21 frequently each behaviour occurred in their family home on a 5-point scale ranging  
22 from ‘never’ to ‘always.’ High scores can indicate positive (i.e., involvement) or  
23 negative (i.e., inconsistent discipline, poor supervision, corporal punishment) parenting.  
24  
25

### 26 27 28 29 30 31 32 33 **Cognitive functioning**

34  
35 *Emotional Stroop task.* In this task, participants have to categorise an adjective as angry,  
36 happy, or sad while ignoring the valence of the expression on a face upon which the  
37 adjective is superimposed (Preston & Stansfield, 2008). There are three blocks of trials:  
38 words only (32 trials), faces only (32 trials), and words and faces combined (64 trials).  
39 In the word-only block, the stimulus is one of the four emotion words (HAPPY, SAD,  
40 ANGRY, or SCARED; 8 trials each). In the face-only block, the stimulus is 1 of 16  
41 pictures of facial affect (Ekman & Friesen, 1976), each appearing twice. The 16 pictures  
42 consist of 1 picture displaying each of the four emotions (happy, sad, angry, and scared)  
43 from each of four actors (older man, younger man, blonde woman, and brunette  
44 woman). In the word-and-face block, the stimulus is 1 of the same 16 faces with one of  
45 the four emotion words superimposed semi-transparently (89% transparent) over the  
46 face, centred vertically on the nose. On 48 trials in the word-and-face block, the facial  
47 expression matched the word (congruent trials—12 repetitions of each word matched to  
48 three iterations of each of the four actors expressing that emotion). On the other 16  
49  
50  
51  
52  
53  
54  
55  
56  
57  
58  
59  
60



1  
2  
3 trials, the facial expression did not match the word (incongruent trials—4 repetitions of  
4 each word matched at random to one of the possible remaining incongruent facial  
5 expressions). The emotional Stroop task generates two indices of affective executive  
6 control: the incongruency index and the congruency index. The incongruency index is  
7 the cost in reaction time to correctly categorize an emotional adjective when the  
8 background face depicts an incongruent emotional expression relative to when the face  
9 depicts a neutral emotional expression. The congruency index reflects the facilitation in  
10 reaction time to categorize an emotional adjective when the background face depicts a  
11 congruent facial expression relative to the neutral condition.  
12  
13  
14  
15  
16  
17  
18  
19

20 *Emotion Regulation task.* This task assesses the use of two strategies of cognitive  
21 emotion regulation: reappraisal and attentional control (i.e., distraction) (Kanske et al.,  
22 2011). Participants view neutral or negative emotional pictures on the screen one by  
23 one. After a short time, a text instruction appears on the screen to either ‘View,’  
24 ‘Reappraise,’ or ‘Distract’ the emotion elicited by the current picture. Each picture  
25 appears in nearly every condition for approximately 6 seconds (in total, 128 trials). The  
26 ‘View’ condition refers to not regulating the emotional response to the picture at all.  
27 ‘Reappraisal’ means attenuating the initial emotional response by finding alternative  
28 interpretations of the picture. During ‘Distraction’ trials, a simple arithmetic task  
29 appears on the screen to which participants can then shift their attention in order to  
30 downregulate their emotions. After each trial, participants rate their current emotional  
31 state using the Self-Assessment Manikin (SAM). This task provides indices of  
32 individual general emotional reactivity, reappraisal effects and distraction effects.  
33 Scores are derived from rating differences between emotional categories and emotion  
34 regulation conditions.  
35  
36  
37  
38  
39  
40  
41  
42  
43  
44  
45

## 46 Measures used in Phase II

### 47 Clinical evaluation

48  
49 *Mini-International Neuropsychiatric Interview.* The Mini-International  
50 Neuropsychiatric Interview (MINI) was developed by Sheehan and Lecrubier (Sheehan  
51 et al., 1998) to meet the need for a brief, reliable, and valid structured diagnostic  
52 interview. The MINI contains 130 questions that assess 16 axis I DSM-IV disorders and  
53 is organised in diagnostic modules. For most modules, two to four screening questions  
54  
55  
56  
57  
58  
59  
60

1  
2  
3 are used to rule out the diagnosis when answered negatively. Positive responses to  
4 screening questions are explored by further investigation of other diagnostic criteria  
5 (according to the standard MINI assessment protocol).  
6  
7

8  
9 *Edinburgh Handedness Inventory.* The Edinburgh handedness inventory is an  
10 instrument used to assess the dominance of a person's hand in everyday activities  
11 (Oldfield, 1971). We will use the self-administered version.  
12  
13

14  
15 *Short-form Frequency Food Questionnaire.* The Short-form Frequency Food  
16 questionnaire (SFFFQ; Cleghorn et al., 2016) is a measure of the quality of dietary  
17 habits. It evaluates the consume of 25 items including fruit, vegetables, fibre-rich foods,  
18 high fat and high-sugar foods, meat, meat products, and fish. The participants are asked  
19 to tick one option (ranging from 'rarely' to '5+ a day') for each of the items.  
20  
21  
22  
23

24  
25 *Wechsler Abbreviated Scale of Intelligence.* The Wechsler Abbreviated Scale of  
26 Intelligence (WASI; Wechsler, 1999) is a short measure of IQ composed by four  
27 subtests: Vocabulary, Block Design, Similarities and Matrix Reasoning. We will use the  
28 subtests Vocabulary and Matrix reasoning to estimate the IQ of each participants.  
29  
30  
31

### 32 **Neuroimaging protocol**

33  
34  
35  
36 *The State-Trait Anxiety Inventory (STAI;* Spielberger et al., 1983) is a measure of state  
37 and trait anxiety that includes items such as: 'I am tense,' 'I am worried,' 'I feel calm,'  
38 and 'I feel secure.' All items are rated on a 4-point scale (e.g., from 'Almost Never' to  
39 'Almost Always'). Higher scores indicate greater anxiety. Internal consistency  
40 coefficients for the scale have ranged from 0.86 to 0.95.  
41  
42  
43

44  
45 *Montreal Imaging Stress Task (30 mins).* We will use a modified version of the  
46 Montreal imaging stress task (MIST; Dedovic et al., 2005). This task comprises a series  
47 of computerized mental arithmetic tasks with an induced failure component. The  
48 protocol consists of a training session conducted outside the imaging unit, and a test  
49 session during which the functional images are acquired. Please see the Supplementary  
50 Material for a description of the paradigm. The test session has two runs. Each run has  
51 three conditions: rest, control, and experimental. During the experimental session, the  
52 program is set to a time limit that is 10% less than the subject's average response time  
53 recorded during the training session. This approach induces a high failure rate. In  
54  
55  
56  
57  
58  
59  
60

1  
2  
3 addition, the program continuously records the participant's average response time and  
4 the number of correct responses. If the participant answers a series of 3 consecutive  
5 mental arithmetic tasks correctly, the program reduces the time limit to 10% less than  
6 the average time for the 3 correctly solved tasks. Conversely, if the subject answers a  
7 series of 3 consecutive tasks incorrectly, the program increases the time limit for the  
8 following tasks by 10%. As such, under experimental conditions, a range of about 20%  
9 to 45% correct answers is enforced (Figure S1). Moreover, between experimental runs,  
10 the participant will see a screen with information about their performance, reminding  
11 them that the average performance is about 80%–90% correct answers and that they  
12 must improve their performance. During the control condition, mental arithmetic is  
13 presented with the same level of difficulty and at the same frequency as during the  
14 experimental sessions, but no time restriction is enforced, and individual performance  
15 and average users' performance are not displayed. Feedback (“correct” or “incorrect”) is  
16 still shown after each task, but because of the absence of a time limit, average  
17 performance increases to about 90%. Finally, during the rest condition, the interface of  
18 the computer program remains on the screen, but no tasks are shown. After the first run,  
19 a member of the radiographer team will show disappointment about the participant’s  
20 performance and ask him/her to try harder (e.g., “You are not doing as well as we had  
21 hoped”, “Please remember that your performance needs to be close to the average to  
22 allow us to use your data”, “Let’s try it again” etc.).

23  
24  
25  
26  
27  
28  
29  
30  
31  
32  
33  
34  
35  
36  
37  
38  
39  
40  
41  
42  
43  
44  
45  
46  
47  
48  
49  
50  
51  
52  
53  
54  
55  
56  
57  
58  
59  
60  
*The Life-Events Questionnaire* evaluates recent undesirable and desirable life events and  
friendships (LEQ; Goodyer et al., 1997). Participants are asked to rate 13 major life  
events during the preceding 12-month period that may have affected them. These may  
include changes in school, deaths, household disasters, friendship difficulties, and  
illnesses. Respondents are asked how they felt about the event on a scale of 1=‘very  
pleasant/happy’ to 5=‘very unpleasant/sad/painful.’ A quantitative estimate of the  
adverse life events is obtained by summarising the number of events rated either 4 or 5  
for more than two weeks.

### Measures used in Phase III

*Perceived Stress Scale.* The Perceived Stress Scale (PSS; Cohen et al., 1983) is the most  
widely used psychological instrument for measuring the perception of stress. This 10-  
item scale measures the degree to which situations in one’s life are appraised as

stressful. Items are designed to tap how unpredictable, uncontrollable, and overloaded respondents find their lives. The scale also includes direct queries about current levels of experienced stress. Scores can range from 0-40 with higher scores indicating higher perceived stress.

*Interpersonal Sensitivity Measure.* The Interpersonal Sensitivity Measure (IPSM; Harb et al., 2002) is a 28-item scale that assesses excessive sensitivity to the interpersonal behaviour of others, social feedback, and (perceived or actual) negative evaluation by others. The measure includes a total score and three subscale scores: interpersonal worry and dependency (eleven items; e.g., 'I worry about what others think of me'), low self-esteem (ten items e.g., 'If other people knew what I am really like, they would think less of me'), and unassertive interpersonal behaviour (eight items; e.g., 'I find it hard to get angry with people').

*Ruminative Response Scale.* The 10-item Ruminative Response Scale (RRS-10; Treynor et al., 2003) is one of the most widely used self-report measures of rumination, comprising 10 items and describing the factors of brooding and reflection. Each item is rated on a 4-points Likert scale ranging from 1='never' to 4='always'. The total score ranges from 10 to 40, with higher scores indicating higher degrees of ruminative symptoms.

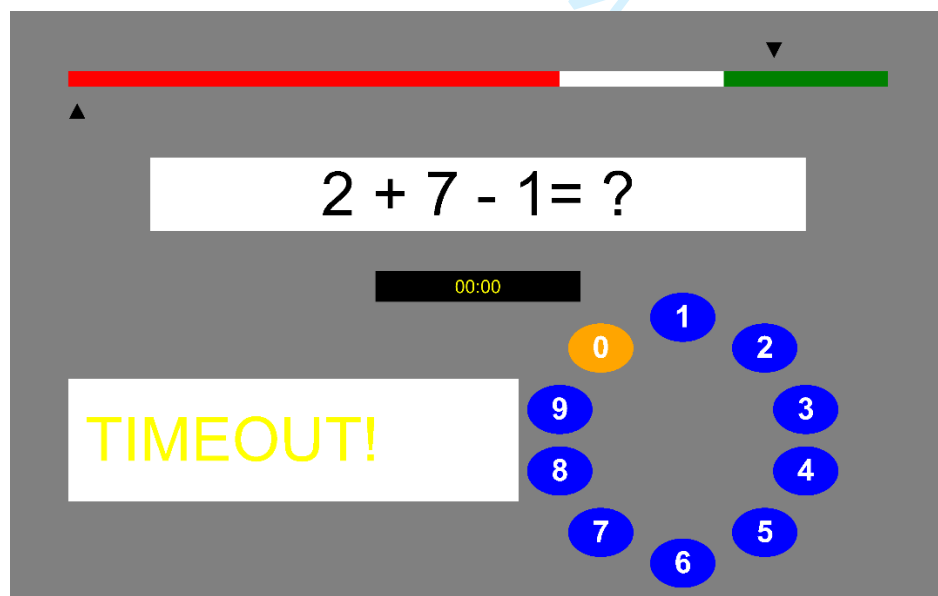

**Figure S1.** Graphical user interface of the MIST. From top to bottom, the figure shows the performance indicators (top arrow=average performance, bottom arrow=individual subject's performance), the mental arithmetic task, the progress bar reflecting the imposed time limit, the text field for feedback, and the rotary dial for the response submission.

## Risk and ethical issues

The main risk and ethical issues associated with the protocol are: 1) Consent, 2) Confidentiality, 3) Risks and costs of participation, and 4) Compensation for participation.

### **Consent**

Our participants will be 16 years old or older. We will obtain informed consent for each of the phases of the study: first, we will obtain consent verbally over the telephone when participants express their interest in the study. We will go through the PIS and inclusion/exclusion criteria to ensure participants are aware of the nature of the study. Participants will have opportunities to ask questions and details regarding confidentiality, anonymity, storage and use of data, as well as right to withdraw. Only those participants who meet the inclusion criteria and are willing to participate in the study will be invited to do so. We will send them an email with the links and instructions to complete the first online ICF, a set of self-rate questionnaires, and three cognitive tasks online. On the day of the scanning we will obtain informed consent in writing before the participants start the assessments. We will ensure that consent is voluntary and that participants are fully informed by asking whether they have understood everything on the form and whether they have any questions regarding the different assessments. We will then reiterate that participation is voluntary and that they can stop the evaluations at any time. Finally, and within a month of their in-unit evaluation at Addenbrooke's Hospital, we will send them an email with the link to complete the last online ICF and a set of self-rate questionnaires.

### **Confidentiality**

Identifiable data will be linked by a unique ID number to the participant's anonymised study assessments. Participants will be carefully monitored to ensure that the procedures are followed in accordance with the UK Data Protection Act 2018. Only RAISE study team members, who are fully aware of their responsibilities to conform to the Data Protection Act 2018, will be allowed access to the personally identifiable data which will be stored in a highly secure, password encrypted database.

1  
2  
3 The transfer and storage of the participant's biological samples (venous blood) will be  
4 appropriately handled by our collaborators according to their standard operating  
5 procedures. All tissue samples will be labelled with a non-identifiable participant ID,  
6 date of birth, data of collection and sample identifier (i.e., serum), and stored in a -80°  
7 Celsius freezer at Addenbrookes Hospital. All samples will be scanned into a secure  
8 electronic database (i.e., RedCAP) to track their location and to ensure that all samples  
9 are accounted for.  
10  
11  
12  
13  
14

15  
16 All participants will be asked to provide consent to contact their parents (<18 year old  
17 participants) or general practitioner, in case the collected data suggest that the  
18 participant might require further clinical assessment or treatment.  
19  
20  
21

### 22 **Risks and costs of participation**

23  
24  
25 *Distress during the completion of the questionnaires and cognitive tasks online:* some  
26 participants may find the questionnaires (e.g., CTQ, MFQ) or the cognitive tasks (e.g.,  
27 emotion regulation task) distressing. In order to minimise this emotional burden we  
28 have made sure that both the questionnaires and cognitive tasks included in the study  
29 reiterate that the participant may withdraw at any time during the completion of the  
30 questionnaires/tasks, in which case, they will see a screen with a list of local mental  
31 health resources with activated web links. Moreover, following the completion of the  
32 Emotional Regulation Task, participants will be debriefed to inform them that the task  
33 was designed to produce an emotional response and it is completely normal and even  
34 intended that they reacted emotionally to the pictures presented.  
35  
36  
37  
38  
39  
40  
41  
42

43 *Self-injury and suicidality disclosure:* self-injury and suicidality disclosure will be  
44 addressed during the completion of the questionnaires online and at the end of the in-  
45 unit assessment. The completion of the questionnaires is configured in such a way that  
46 the RAISE study research team will receive an immediate email if the participant  
47 discloses current self-injury or suicidality (i.e., affirmative answer on Q19 of the MFQ  
48 and/or Qs11-12, or Qs14-15 of the DASI). The principal investigator and/or a suitable  
49 member of the research team will then review the participant's questionnaires with the  
50 psychiatrists affiliated with the study and if there is concern about imminent risk of self-  
51 injury or danger to the participant (e.g. disclosed current physical, sexual, or emotional  
52 abuse), they will call the participant. This will also be an opportunity to gather further  
53  
54  
55  
56  
57  
58  
59  
60

1  
2  
3 details (particularly regarding suicidal thoughts) and clarify whether they are in need of,  
4 and seeking, the appropriate help. If the risk is imminent, we will suggest the participant  
5 call First Response Service (111) or attend E&A. If the risk is not imminent and the  
6 participant is 18+ we will suggest they talk to their GP. If the participant is 16-17, we  
7 will suggest they talk to their GP and their parents/the people they live with about how  
8 they are feeling. If the participant refuses to seek help, we have a duty to care and it will  
9 be necessary to breach confidentiality. If the participant is 18+ we will contact their GP.  
10 If the participant is 16-17 we will contact their parents/guardians first. If contacting  
11 parents/guardians is contraindicated because of poor guardians-participant relationships  
12 (e.g., when disclosing to a parent may increase risk of suicide), direct contact with the  
13 participant's GP, or other local clinic or clinical support will be sought. Important points  
14 to note during disclosure to parents/guardians include: explaining that the study  
15 measures are not clinical instruments and thus cannot be used to detect future risk with  
16 absolute certainty, expressing concern about their child's responses to specific items,  
17 reinforcing that the safety of their child is of primary importance, helping them to think  
18 about how to get a psychological evaluation of their child and encouraging them to do  
19 so, reminding them that any information shared by their child was difficult for them to  
20 disclose, and recommending non-punitive and sensitive behaviour towards their child  
21 with regard to the issue. In the in-unit assessment, in addition to having lunch and time  
22 to relax, we will have a distress protocol in place in case the participant reports severe  
23 distress during or after the assessments.

24  
25  
26  
27  
28  
29  
30  
31  
32  
33  
34  
35  
36  
37  
38  
39  
40  
41 *Risks associated with the venepuncture:* to minimise discomfort, blood taking will be  
42 conducted by a clinical research nurse, according to the standard Clinical Research  
43 Facilities operating procedures and risk protocols. The participant will have time to rest  
44 after the procedure.

45  
46  
47  
48 Distress and discomfort during brain scanning: the MIST task is intended to be stressful.  
49 Therefore, after the session, we will debrief our participants by explaining to them that  
50 the task was designed to be impossible to accomplish and that it did not assess their true  
51 ability to perform mental arithmetic. Moreover, MRI scanners are very loud. In order to  
52 reduce any potential discomfort, all participants will be given earplugs for aural  
53 protection. MRI scanning also requires participants to lie still in the scanner which some  
54 may find uncomfortable or may induce feelings of claustrophobia. We will ensure that  
55  
56  
57  
58  
59  
60



1  
2  
3 participants are as comfortable as possible by providing neck and arm pillows.  
4  
5 Furthermore, we will make sure that participants can communicate with a member of  
6  
7 the research team at any time during scanning. They will be informed that if they would  
8  
9 like to stop they may do so by pressing a button which will be easily accessible to them  
10  
11 at all times.

12 *Potential clinical findings:* we will obtain consent from participants to inform their GP  
13  
14 if any clinically relevant information comes to light during their participation in the  
15  
16 study. In all cases, we will discuss it with a specialist and contact the participant first. If  
17  
18 the participant refuses to seek help, we have a duty to care and it will be necessary to  
19  
20 breach confidentiality. For neuroimaging findings, the Wolfe Brain Imaging Center  
21  
22 (where the acquisition of the images will take place) policy is that all studies will  
23  
24 include at least T1 and T2 weighted datasets, that are internally reported by a clinically  
25  
26 qualified reviewer, who will refer to the WBIC clinical lead. The clinical lead will  
27  
28 counsel the individual regarding further clinical referrals (including potential GP  
29  
30 referral).

31 *Time burden:* the online assessments are not expected to last more than 2 and 1 hours  
32  
33 respectively. During the in-unit assessment each participant will be tested for no longer  
34  
35 than 5 hours in total. These durations will be clearly communicated to the participants at  
36  
37 the beginning of the study.

### 38 39 **Compensation for participation**

40  
41  
42 To compensate for their time, participants will be paid £150. In addition, breakfast and  
43  
44 lunch will be provided on the in-unit assessment day.  
45  
46  
47  
48  
49  
50  
51  
52  
53  
54  
55  
56  
57  
58  
59  
60

## References

- Achenbach TM. Manual for the child behavior checklist/4-18 and 1991 profile. Department of Psychiatry: University of Vermont, 1991.
- Angold A, Costello EJ, Messer SC, Pickles A. Development of a short questionnaire for use in epidemiological studies of depression in children and adolescents. *International Journal of Methods in Psychiatric Research* 1995;5:237–49.
- Bamber D, Tamplin A, Park RJ, Kyte ZA, Goodyer IM. Development of a Short Leyton Obsessional Inventory for children and adolescents. *Journal of the American Academy of Child & Adolescent Psychiatry* 2002;41:1246–52.
- Bernstein DP, Fink L, Handelsman L, Foote J, Lovejoy M, Wenzel K, et al. Initial reliability and validity of a new retrospective measure of child abuse and neglect. *The American Journal of Psychiatry* 1994;151:1132–6.
- Cassels M, van Harmelen A, Neufeld S, Goodyer I, Jones PB, Wilkinson P. Poor family functioning mediates the link between childhood adversity and adolescent nonsuicidal self-injury. *Journal of Child Psychology and Psychiatry, and allied disciplines* 2018;59:881–7.
- Cleghorn CL, Harrison RA, Ransley JK, Wilkinson S, Thomas J, Cade JE. Can a dietary quality score derived from a short-form FFQ assess dietary quality in UK adult population surveys? *Public Health Nutrition* 2016;19:2915–23.
- Cohen S, Kamarck T, Mermelstein R. A Global Measure of Perceived Stress. *Journal of Health and Social Behavior* 1983;24:385–96.
- Daviss WB, Birmaher B, Melhem NA, Axelson DA, Michaels SM, Brent DA. Criterion validity of the Mood and Feelings Questionnaire for depressive episodes in clinic and non-clinic subjects. *Journal of Child Psychology and Psychiatry* 2006;47:927–34.
- Dedovic K, Renwick R, Mahani NK, Engert V, Lupien SJ, Pruessner JC. The Montreal Imaging Stress Task: using functional imaging to investigate the effects of perceiving and processing psychosocial stress in the human brain. *The Journal of Psychiatry & Neuroscience* 2005;30:319–25.

1  
2  
3 Ekman P, Friesen WV. Pictures of Facial Affect. Palo Alto, CA: Consulting  
4 Psychologists Press, 1976.

5  
6  
7 Elgar FJ, Waschbusch DA, Dadds MR, Sigvaldason N. Development and validation of  
8 a short form of the Alabama Parenting Questionnaire. *Journal of Child and Family*  
9 *Studies* 2007;16:243–59.

10  
11  
12 Epstein NB, Baldwin LM, Bishop DS. The McMaster Family Assessment Device.  
13 *Journal of Marital and Family Therapy* 1983;9:171–80.

14  
15  
16  
17  
18 Goodyer IM, Herbert J, Tamplin A, Secher SM, Pearson J. Short-term outcome of  
19 major depression: II. Life events, family dysfunction, and friendship difficulties as  
20 predictors of persistent disorder. *Journal of the American Academy of Child &*  
21 *Adolescent Psychiatry* 1997;36:474–80.

22  
23  
24  
25  
26 Harb GC, Heimberg RG, Fresco DM, Schneier FR, Liebowitz MR. The psychometric  
27 properties of the Interpersonal Sensitivity Measure in social anxiety disorder. *Behaviour*  
28 *Research and Therapy* 2002;40:961–79.

29  
30  
31  
32 Kanske P, Heissler J, Schönfelder S, Bongers A, Wessa M. How to regulate emotion?  
33 Neural networks for reappraisal and distraction. *Cerebral Cortex* 2011;21:1379–88.

34  
35  
36  
37 Kessler RC, Andrews G, Colpe LJ, Hiripi E, Mroczek DK, Normand S-LT, et al. Short  
38 screening scales to monitor population prevalences and trends in non-specific  
39 psychological distress. *Psychological Medicine* 2002;32:959–76.

40  
41  
42  
43 Miller IW, Epstein NB, Bishop DS, Keitner GI. The McMaster Family Assessment  
44 Device: reliability and validity. *Journal of Marital and Family Therapy* 1985;11:345–56.

45  
46  
47  
48 Oldfield RC. The assessment and analysis of handedness: The Edinburgh inventory.  
49 *Neuropsychologia* 1971;9:97–113.

50  
51  
52  
53  
54  
55  
56  
57  
58  
59  
60  
Parker G, Roussos J, Hadzi-Pavlovic D, Mitchell P, Wilhelm K, Austin M-P. The  
development of a refined measure of dysfunctional parenting and assessment of its  
relevance in patients with affective disorders. *Psychological Medicine* 1997;27:1193–  
203.

1  
2  
3 Petersen W. *Society and the Adolescent Self-Image*. Morris Rosenberg. Princeton  
4 University Press, Princeton, N.J., 1965.

7 Preston SD, Stansfield RB. I know how you feel: Task-irrelevant facial expressions are  
8 spontaneously processed at a semantic level. *Cognitive, Affective, & Behavioral*  
9 *Neuroscience* 2008;8:54–64.

13 Reynolds CR, Richmond BO. What I think and feel: a revised measure of children's  
14 manifest anxiety. *Journal of Abnormal Child Psychology* 1978;6:271–80.

18 Rubio-Stipec M, Bird H, Canino G, Gould M. The internal consistency and concurrent  
19 validity of a Spanish translation of the Child Behavior Checklist. *Journal of Abnormal*  
20 *Child Psychology* 1990;18:393–406.

24 Sheehan DV, Lecrubier Y, Sheehan KH, Amorim P, Janavs J, Weiller E, et al. The  
25 Mini-International Neuropsychiatric Interview (M.I.N.I.): the development and  
26 validation of a structured diagnostic psychiatric interview for DSM-IV and ICD-10. *The*  
27 *Journal of Clinical Psychiatry* 1998;59(suppl 20):22–33.

32 Spielberger C, Gorsuch R, Lushene R, Vagg P, Jacobs G. *Manual for the State-Trait*  
33 *Anxiety Inventory*. Palo Alto, CA: Consulting Psychologists Press 1983.

36 Tennant R, Hiller L, Fishwick R, Platt S, Joseph S, Weich S, et al. The Warwick-  
37 Edinburgh Mental Well-being Scale (WEMWBS): development and UK validation.  
38 *Health and Quality of Life Outcomes* 2007;5:63.

42 Treynor W, Gonzalez R, Nolen-Hoeksema S. Rumination reconsidered: a psychometric  
43 analysis. *Cognitive Therapy and Research* 2003;27:247–59.

47 van Harmelen A-L van, Gibson JL, Clair MCS, Owens M, Brodbeck J, Dunn V, et al.  
48 Friendships and family support reduce subsequent depressive symptoms in at-risk  
49 adolescents. *PLOS ONE* 2016;11:e0153715.

53 van Harmelen A-L, Kievit RA, Ioannidis K, Neufeld S, Jones PB, Bullmore E, et al.  
54 Adolescent friendships predict later resilient functioning across psychosocial domains in  
55 a healthy community cohort. *Psychological Medicine* 2017;47:2312–22.

1  
2  
3 Wechsler D. Wechsler Abbreviated Scale of Intelligence. San Antonio, TX: The  
4 Psychological Corporation, 1999.

5  
6  
7 Wood A, Kroll L, Moore A, Harrington R. Properties of the Mood and Feelings  
8 Questionnaire in adolescent psychiatric outpatients: a research note. Journal of Child  
9 Psychology and Psychiatry 1995;36:327–34.  
10  
11  
12  
13  
14  
15  
16  
17  
18  
19  
20  
21  
22  
23  
24  
25  
26  
27  
28  
29  
30  
31  
32  
33  
34  
35  
36  
37  
38  
39  
40  
41  
42  
43  
44  
45  
46  
47  
48  
49  
50  
51  
52  
53  
54  
55  
56  
57  
58  
59  
60

For peer review only
